# Supplementary material for: High variability within pet foods prevents the identification of native species in pet cats’ diets using isotopic evaluation
Source: PeerJ. 2020 Jan 22;8:e8337. doi: 10.7717/peerj.8337 (PMC6982418; doi:10.7717/peerj.8337)
Supplement: Table S2 — The isotope values for cats from the U.K., names, and the identifiers for what pet foods they are given (wet and dry) and the isotope values for both wet and dry pet food from the U.K. as well as brand and flavor. [file peerj-08-8337-s004.xlsx]

## Sheet: UK Cats
Name	Identifier	d13C	d15N	Associated Dry Food	Associated Wet Food
Maverick	F88	-22.1815	6.87785	3A	7X, 8X, 9X, 10X, 19X, 20X, 21X, and 22X
Frank	F89	-22.5488	6.03993	38A	N/A
Dory	F90	-22.4358	6.79582	31A	7X, 8X, 9X, 10X, 19X, 20X, 21X, and 22X
Skye	F91	-22.2483	6.9887	31A	7X, 8X, 9X, 10X, 19X, 20X, 21X, and 22X
Moscow	F92	-22.2835	6.31688	58A	N/A
Neva	F93	-20.9133	6.43583	58A	N/A
Missy	F100	-23.0823	6.7694	47A	ALL
Charlie	F107	-20.7233	8.04215	N/A	7X, 8X, 9X, 10X, 19X, 20X, 21X, and 22X
Lucy	F108	-20.9402	7.95261	N/A	7X, 8X, 9X, 10X, 19X, 20X, 21X, and 22X
Vinni	F111	-20.685	6.44146	N/A	32X, 33X, and 34X
Ares	F112	-20.9576	6.10304	1A	N/A
Athena	F113	-20.6965	6.0587	1A	N/A
Boots	F115	-21.0607	6.88401	30A	7X, 8X, 9X, 10X, 19X, 20X, 21X,22X, 27X, 28X, 29X, 30X, 31X, 52X, 53X, 54X and 55X
Jago	F116	-22.0384	6.79463	30A	7X, 8X, 9X, 10X, 19X, 20X, 21X,22X, 27X, 28X, 29X, 30X, 31X, 52X, 53X, 54X and 55X
Jezebel	F117	-21.5954	6.84949	30A	7X, 8X, 9X, 10X, 19X, 20X, 21X,22X, 27X, 28X, 29X, 30X, 31X, 52X, 53X, 54X and 55X
Spike	F118	-21.8793	7.08827	30A	7X, 8X, 9X, 10X, 19X, 20X, 21X,22X, 27X, 28X, 29X, 30X, 31X, 52X, 53X, 54X and 55X
Ginge	F120	-24.3885	8.72584	60A	N/A
Lola	F124	-22.8867	6.59767	2A	15X, 16X, 17X, and 18X
Gracie	F133	-20.067	7.09695	40A	N/A
Neil	F134	-21.1882	7.02084	53A	23X, 24X, 25X, and 26X
Roger	F137	-20.7261	5.97181	41A	N/A
Dexter	F138	-22.2357	6.3131	50A	37X, 38X, 39X and 40X
Meg	F142	-21.9009	7.37932	6A	7X, 8X, 9X, 10X, 19X, 20X, 21X, and 22X
Sparky	F143	-21.0848	5.71967	12A	N/A
Holly	F153	-23.4505	6.10316	N/A	11X, 12X, 13X, 14X, 15X, 16X, 17X, and 18X
Marley	F154	-22.0716	6.6016	54A	7X, 8X, 9X, 10X, 19X, 20X, 21X, and 22X
Beanie	F155	-20.7812	5.83329	25A	23X, 24X, 25X, 26X, 32X, 33X, 34X, 35X, 36X, 37X, 38X, 39X, and 40X
Binky	F156	-20.6695	6.14509	25A	23X, 24X, 25X, 26X, 32X, 33X, 34X, 35X, 36X, 37X, 38X, 39X, and 40X
Sid	F157	-20.9694	6.12567	25A	23X, 24X, 25X, 26X, 32X, 33X, 34X, 35X, 36X, 37X, 38X, 39X, and 40X
Gracie	F164	-21.8095	6.95783	49A	N/A
Reggie	F165	-21.9833	6.7455	49A	N/A
Lucy	F171	-20.9326	7.63654	44A	N/A
Teddy	F184	-23.9287	5.65715	52A	N/A
Merlin	F185	-21.0513	5.70322	23A	N/A
Macauley	F186	-22.333	6.75277	43A	37X, 38X, 39X and 40X
Lily	F187	-21.2684	5.97407	42A	N/A
Maggie	F188	-20.8271	5.81955	42A	N/A
Maxwell	F190	-22.4746	6.67143	28A	7X, 8X, 9X, 10X, 19X, 20X, 21X, and 22X
Indie	F198	-19.8826	6.33759	10A	N/A
Rusty	F199	-20.5519	5.88492	10A	N/A
Billy	F211	-22.3728	7.0353	56A	N/A
Jim	F212	-22.0025	6.59042	56A	N/A
Pants	F213	-22.6174	7.06853	56A	N/A
Flash	F217	-22.5922	7.3242	39A	7X, 8X, 9X, 10X, 11X, 12X, 13X, 14X, 15X, 16X, 17X, 18X, 19X, 20X, 21X,22X, 52X, 53X, 54X and 55X
Tipsy	F218	-23.0553	6.86186	39A	7X, 8X, 9X, 10X, 11X, 12X, 13X, 14X, 15X, 16X, 17X, 18X, 19X, 20X, 21X,22X, 52X, 53X, 54X and 55X
Mifty	F221	-22.5302	6.48949	16A	7X, 8X, 9X, 10X, 11X, 12X, 13X, 14X, 15X, 16X, 17X, 18X, 19X, 20X, 21X,22X, 27X, 28X, 29X, 30X, 31X, 52X, 53X, 54X and 55X
Balu	F223	-21.4748	6.20692	48A	N/A
Charlie	F224	-21.6875	6.9667	22A	ALL
Max	F225	-20.5422	7.91249	22A	ALL
Jasper	F226	-22.3746	6.22496	62A	N/A
Dexter	F247	-22.0798	5.90894	46A	ALL
Seb	F257	-21.2855	5.82889	63A	11X, 12X, and 13X
CJ	F258	-22.6631	7.05619	63A	11X, 12X, and 13X
Bella	F259	-22.2047	7.43453	21A	23X, 24X, 25X, and 26X
Tom	F260	-22.2159	7.38214	21A	23X, 24X, 25X, and 26X
Jessie	F263	-20.6693	5.66478	N/A	44X, 45X, 46X, and 47X
Jesse	F279	-22.3888	6.57686	N/A	7X, 8X, 9X, 10X, 19X, 20X, 21X, and 22X
Carbonel	F278	-21.5914	6.15202	9A	N/A
Johnny	F281	-21.1661	6.92136	17A	11X, 12X, 13X, 14X, 15X, 16X, 17X, and 18X
Smokey Longnose	F295	-22.6073	6.62821	61A	48X, 49X, 50X, and 51X
Charlie	F296	-22.9914	6.36412	5A	ALL
Coco	F297	-20.8332	6.49909	5A	ALL
Nettle	F301	-22.0306	8.1349	7A	N/A
Magic	F311	-20.858	8.75556	32A	N/A
Smudge	F312	-22.2764	7.29624	32A	N/A
Tigger	F313	-21.9201	6.68772	32A	N/A
Friday	F319	-23.3883	5.80908	8A	N/A
Abba Strange	F326	-23.4224	5.85014	45A	N/A
L. C. Worf	F327	-23.0137	7.56095	45A	N/A
Jessy	F333	-20.9815	6.14196	13A	7X, 8X, 9X, 10X, 19X, 20X, 21X, and 22X
Conker	F342	-18.4139	8.69781	N/A	23X, 24X, 25X, and 26X
Freya	F344	-20.7177	6.81804	33A	7X, 8X, 9X, 10X, 11X, 12X, 13X, 14X, 15X, 16X, 17X, 18X, 23X, 24X, 25X, 26X, 41X, 42X, and 43X
Spot	F346	-22.3859	6.54112	33A	7X, 8X, 9X, 10X, 11X, 12X, 13X, 14X, 15X, 16X, 17X, 18X, 23X, 24X, 25X, 26X, 41X, 42X, and 43X
Bits	F349	-23.0133	6.20449	29A	N/A
Bobs	F350	-22.5611	6.18969	29A	N/A
Lightening Bugg	F351	-21.8815	7.01142	29A	N/A
Bumble	F356	-22.5141	7.39778	N/A	27X, 28X, 29X, 30X, 31X, 52X, 53X, 54X and 55X
Ebby	F357	-21.687	6.09899	N/A	27X, 28X, 29X, 30X, 31X, 52X, 53X, 54X and 55X
Tilly	F362	-21.2313	6.50966	51A	N/A
Henry	F363	-22.5009	7.77599	19A	7X, 8X, 9X, 10X, 19X, 20X, 21X, and 22X
Guinness	F377	-22.0243	7.62148	55A	N/A
Ladyboyhawke	F378	-22.3426	7.36711	15A	7X, 8X, 9X, 10X, 11X, 12X, 13X, 14X, 15X, 16X, 17X, and 18X
Poppet	F379	-21.7944	6.95077	15A	7X, 8X, 9X, 10X, 11X, 12X, 13X, 14X, 15X, 16X, 17X, and 18X
Pussy	F380	-21.4289	6.50545	15A	7X, 8X, 9X, 10X, 11X, 12X, 13X, 14X, 15X, 16X, 17X, and 18X
Jago	F385	-21.4899	7.68478	4A	32X, 33X, 34X, 35X, 36X, 37X, 38X, 39X, and 40X
Lady T	F416	-22.1794	7.07099	20A	7X, 8X, 9X, 10X, 19X, 20X, 21X, 22X, 23X, 24X, 25X, 26X, 32X, 33X, 34X, 35X, 36X, 37X, 38X, 39X, and 40X
Winnie	F417	-22.1621	7.43818	20A	7X, 8X, 9X, 10X, 19X, 20X, 21X, 22X, 23X, 24X, 25X, 26X, 32X, 33X, 34X, 35X, 36X, 37X, 38X, 39X, and 40X
Barney	F418	-22.2926	7.15719	14A	27X, 28X, 29X, 30X, 31X, 52X, 53X, 54X and 55X
Fonzie	F419	-20.6982	5.7469	14A	27X, 28X, 29X, 30X, 31X, 52X, 53X, 54X and 55X
Whiskey	F422	-21.4796	6.7203	11A	N/A
Biscuit	F431	-22.7418	7.13986	N/A	7X, 8X, 9X, 10X, 19X, 20X, 21X, 22X, 23X, 24X, 25X, and 26X
Charlie	F439	-22.075	6.16438	N/A	27X, 28X, 29X, 30X, 31X, 52X, 53X, 54X and 55X
Amber	F442	-22.7204	6.78737	27A	37X, 38X, 39X and 40X
Millie	F446	-22.1691	6.60952	N/A	27X, 28X, 29X, 30X, 31X, 52X, 53X, 54X and 55X
Ernie	F449	-19.2382	6.20622	27A	37X, 38X, 39X and 40X
Frank	F467	-18.7277	6.09075	36A	N/A
Smudge	F469	-19.4304	6.5989	35A	N/A
Carrots	F471	-22.3832	6.88704	37A	N/A
Wilfred	F515	-22.0392	7.13709	18A	7X, 8X, 9X, 10X, 19X, 20X, 21X, and 22X
Alfie	F521	-22.5631	6.57045	N/A	37X, 38X, 39X and 40X
China	F523	-22.9414	6.79977	N/A	37X, 38X, 39X and 40X
Siberia	F544	-20.5629	6.08842	57A	N/A
Casper	F592	-21.9186	6.49503	59A	N/A
Mac	F-MAC	-20.673	7.54292	MACA	56X and 57X
Bailey	F-IND	-22.7175	6.74055	N/A	N/A
Victor	F-FER	-24.0825	7.32825	N/A	N/A

## Sheet: UK Food
Brand	Flavor	Identifier	d13C	d15N
Hill's	Science Plan Light adult 1-6 tuna	10A	-19.6334	5.27486
Whiskas	1 + years Whitefish in Jelly	10X	-26.3576	3.9115
Purina	One chicken	11A	-22.8437	2.87791
Felix	As Good as it looks Tuna in Jelly	11X	-27.0712	3.629
Whiskas	kitten	12A	-23.9181	4.14851
Felix	As Good as it looks Salmon in Jelly	12X	-27.5651	3.38543
Purina	GoCat Tuna and herring/chicken and turkey	13A	-27.0337	2.92863
Felix	As Good as it looks Sardine in Jelly	13X	-27.0068	3.21105
Whiskas	Chicken Complete	14A	-24.1173	4.42145
Felix	As Good as it looks Saithe in Jelly	14X	-28.1265	3.67768
Purina	Adult chicken	15A	-24.4566	2.96815
Felix	7 + As Good as it looks Doubly Delicious Chicken and Kidney in Jelly	15X	-27.9122	2.7037
Purina	GoCat crunchy and tender with salmon	16A	-26.1008	3.59296
Felix	7 + As Good as it looks Doubly Delicious Turkey and Liver in Jelly	16X	-27.5273	3.86189
Purina	One adult with chicken	17A	-22.3903	4.36695
Felix	7 + As Good as it looks Doubly Delicious Lamb and Chicken in Jelly	17X	-27.7517	3.06149
Purina	GoCat	18A	-24.3015	4.31134
Felix	7 + As Good as it looks Doubly Delicious Beef and Poultry in Jelly	18X	-27.7569	3.30069
Purina	One light	19A	-23.9557	4.95633
Whiskas	1 + years Chicken in Gravy	19X	-26.6629	5.35232
N/A	Unknown	1A	-16.9766	3.80472
Whiskas	1+yrs chicken	20A	-23.3437	4.36811
Whiskas	1 + years Turkey in Gravy	20X	-26.9575	5.00441
Whiskas	7 +years	21A	-23.1117	4.49179
Whiskas	1 + years Duck in Gravy	21X	-25.7551	4.87711
Purina	One light chicken flavour	22A	-25.1923	3.12988
Whiskas	1 + years Poultry in Gravy	22X	-26.1717	4.98449
James Wellbeloved	Turkey	23A	-25.4803	3.96556
Sheba	Turkey in white sauce	23X	-23.3384	3.11738
Sheba	Lamb and vegetables	24X	-23.872	4.05947
Purina, Royal Canin	One salmon, Urinary S/O	25A	-23.2809	2.15853
Sheba	Select slices in gravy Chicken	25X	-23.9467	3.75331
Sheba	Select slices in gravy Beef	26X	-23.3	3.95569
Perfect Fit	Adult with salmon	27A	-23.2053	5.48858
Asda Tiger	Adult Salmon and trout pate	27X	-26.0777	5.44853
Harringtons Chicken	Chicken and rice	28A	-22.5134	4.03568
Asda Tiger	Adult Tuna pate	28X	-25.5095	4.93816
Purina	GoCat and other assorted cheap DFs	29A	-26.6155	3.24573
Asda Tiger	1+ Chicken pate	29X	-25.8045	5.40935
Royal Canin	Appetite Control 7+	2A	-24.0574	3.68653
Iams	mullticat chicken supplemented with cheap df	30A	-21.6027	4.45031
Asda Tiger	1+ Salmon in Jelly	30X	-25.417	3.5477
Whiskas	1 year chicken	31A	-24.2191	4.4679
Asda Tiger	8+ Chicken and turkey pate	31X	-25.9378	5.47272
Sainsbury's Own	Sainsburys own complete with salmon, shrimp & tuna	32A	-26.0648	5.12734
Gourmet	Gold adult Salmon	32X	-24.9018	4.71126
Purina	One Sensitive	33A	-22.9436	3.55078
Gourmet	Gold adult Turkey	33X	-24.7214	3.59185
Gourmet	Gold senior 7+ Ocean fish	34X	-23.9937	4.69087
Hill's, Iams	Science plan metabolic, Chicken	35A	-22.659	3.83889
Gourmet	Solitaire Duck in a sauce with garden vegetables	35X	-26.4117	3.07777
Hill's	Science plan CD & reduced calorie chicken biscuits, CD chicken wet meat pouches	36A	-21.5666	4.36826
Gourmet	Solitaire Beef in a sauce with tomato	36X	-26.5172	3.70517
Iams	Chicken	37A	-21.1101	3.76284
Gourmet	Perle Beef	37X	-27.728	4.23971
Purina	Unknown	38A	-22.568	2.62677
Gourmet	Perle Chicken	38X	-27.5462	2.97988
Whiskas	Chicken	39A	-23.8708	5.56183
Gourmet	Perle Turkey	39X	-27.5899	2.96014
N/A	Unknown	3A	-26.798	2.89861
Purina	Veterintary diet feline (Renal Function)	40A	-24.2755	4.00884
Gourmet	Perle Salmon	40X	-27.3262	3.16183
Animonda vom Feinstein	Deluxe Adult Chicken	41A	-21.7792	3.81567
Encore	Chicken breast	41X	-21.1233	2.26077
Royal Canin	Hairball Control	42A	-24.2269	5.09123
Encore	Chicken with cheese	42X	-24.1919	2.79151
Affinity	Advanced Veterinary Diets Obesity Formula	43A	-20.497	4.89376
Encore	Chicken with ham	43X	-21.185	2.64327
Iams	Mature and Senior	44A	-20.8759	4.4489
Tesco	Cuts in Jelly adult Tuna	44X	-25.9384	4.2308
Purina	GoCat chicken and duck	45A	-26.8307	3.48815
Tesco	Cuts in Jelly adult Salmon	45X	-26.3425	4.09998
Asda Tiger	Chicken, turkey and vegetables	46A	-26.7036	4.30445
Tesco	Cuts in Jelly adult Prawn	46X	-26.1777	3.94071
Whiskas, Iams	whiskas duck and turkey filled pockets and Iams delight	47A	-23.9027	3.90458
Tesco	Cuts in Jelly adult Haddock	47X	-25.3746	5.24283
Purina	GoCat tuna and herring	48A	-26.2489	2.61967
Sainsburys	Adult complete nutrition in jelly Salmon	48X	-25.7205	4.05278
Whiskas	Unknown	49A	-24.0865	3.62983
Sainsburys	Adult complete nutrition in jelly Ocean white fish and shrimp	49X	-25.8628	4.05431
Royal canin	Fit regular	4A	-24.2293	3.86384
Purina	One coat and hairball adult with chicken	50A	-25.0866	3.55455
Sainsburys	Adult complete nutrition in jelly Trout	50X	-26.2444	4.09429
N/A	Homemade	51A	-27.2243	4.04911
Sainsburys	Adult complete nutrition in jelly Sardine and hake	51X	-26.2072	4.4322
Purina	Go Cat Chicken	52A	-27.2592	3.45186
Lidls Coshida	Succulent chunks in jelly Duck	52X	-25.3675	4.13345
Whiskas	with tuna 1+years	53A	-24.6174	4.19809
Lidls Coshida	Succulent chunks in jelly Salmon	53X	-24.4039	3.9553
James wellbeloved	Adult fish flavour	54A	-24.145	7.59378
Lidls Coshida	Succulent chunks in jelly Chicken	54X	-24.115	3.6541
Arden Grange	Grain free adult chicken and potatoes	55A	-26.9904	3.19209
Lidls Coshida	Succulent chunks in jelly Beef	55X	-25.0525	4.5978
Purina	Go- cat crunchy and tender salmon and tuna	56A	-26.4916	3.62582
Applaws	Tuna fillet	56X	-17.7389	14.9282
Royal Canin	Royal Canin neutered young female	57A	-23.8535	3.64788
Applaws	Ocean fish	57X	-20.4863	11.0932
Harringtons, Benevo	Harringtons Chicken and rice, Benevo adult original flavour, unknown brand renal biscuits	58A	-22.4902	3.28528
Purina	GoCat	59A	-26.1184	4.31318
Purina	One	5A	-25.4737	2.76264
Burgess	supercat salmon/chicken	60A	-22.5852	4.11876
Iams	Adult 1-6 years Proactive health chicken	61A	-21.6073	3.85408
James Wellbeloved	Light fish and turkey	62A	-25.5911	5.11822
Purina	One Bifensis Dual Defense Chicken	63A	-24.5386	3.55136
Whiskas	1+ years	6A	-22.9309	5.26857
Royal Canin	Royal Canin Outdoor	7A	-23.3392	4.13663
Whiskas	1 + years Tuna in Jelly	7X	-26.0416	4.54036
AVA	AVA optimum health	8A	-26.2714	4.02088
Whiskas	1 + years Salmon in Jelly	8X	-26.5576	5.03823
Purina, Royal Canin	One, Satiety	9A	-23.9365	4.62597
Whiskas	1 + years Coley in Jelly	9X	-26.2325	4.36968
Encore	Encore	MACA	-25.3486	2.82114
