# Supplementary figures and images for: High variability within pet foods prevents the identification of native species in pet cats’ diets using isotopic evaluation
Source: PeerJ journal article supplement (doi:10.7717/peerj.8337), 2020-01-22

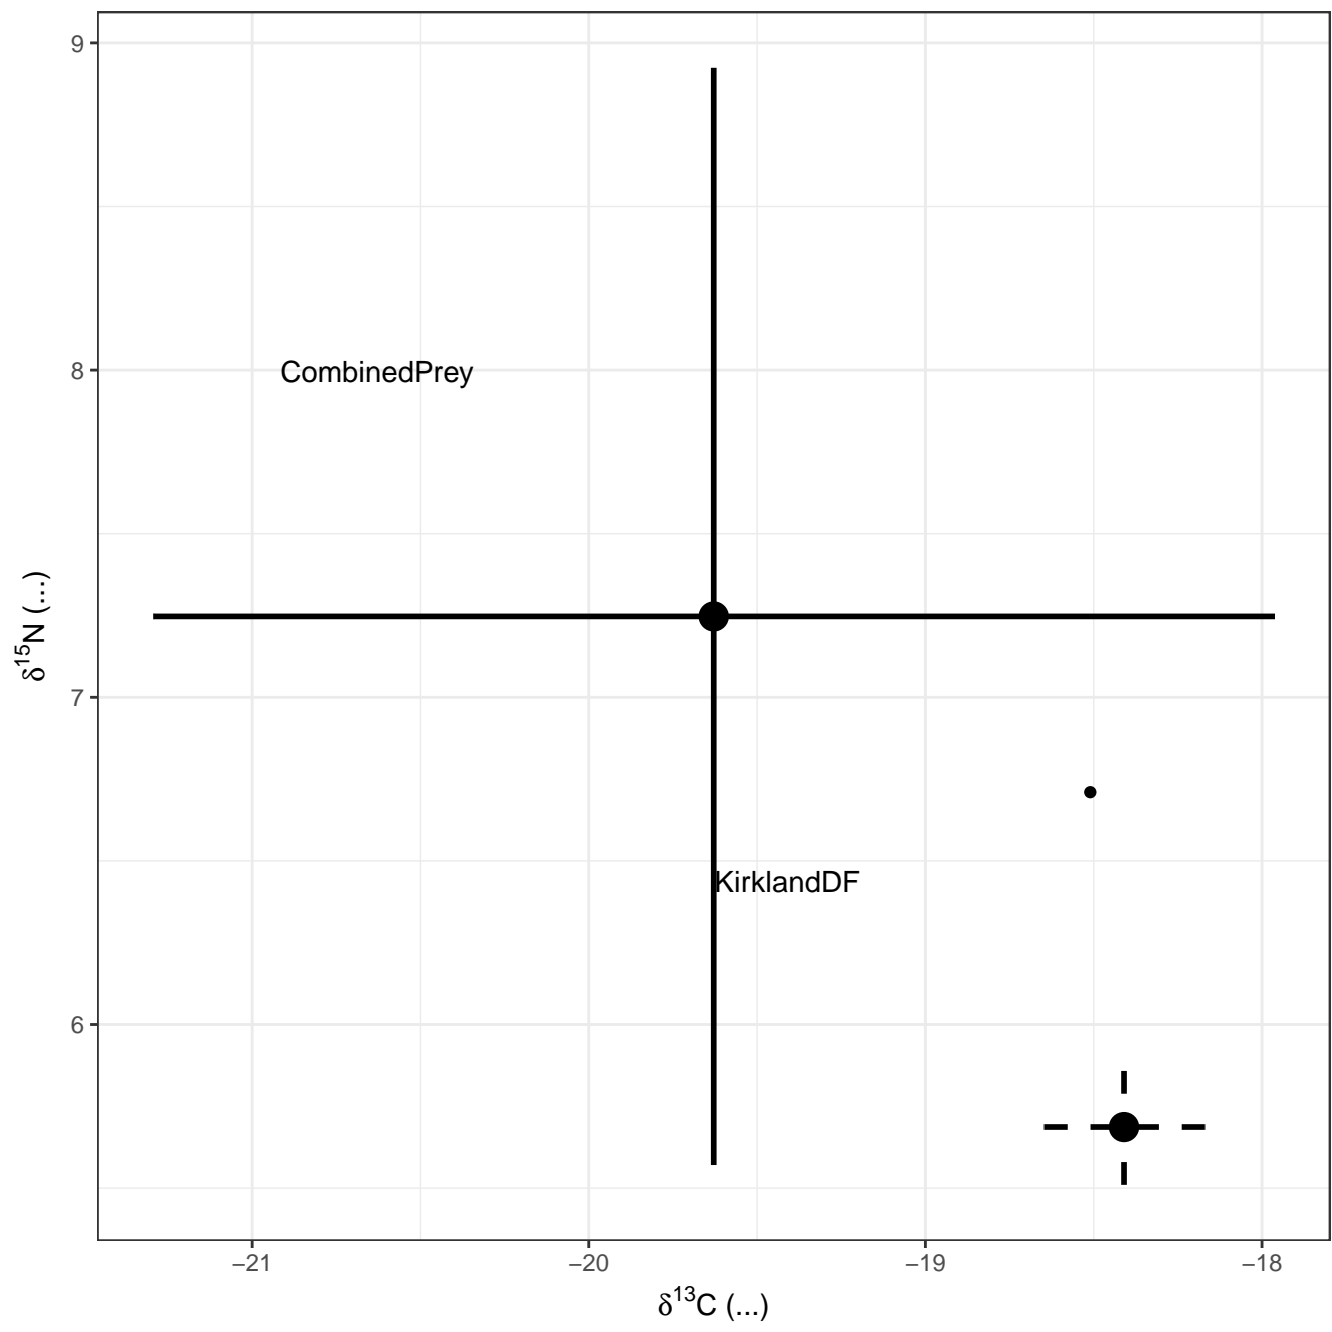

Supplement: Isospace_plots.zip [file Isospace_plots.zip]

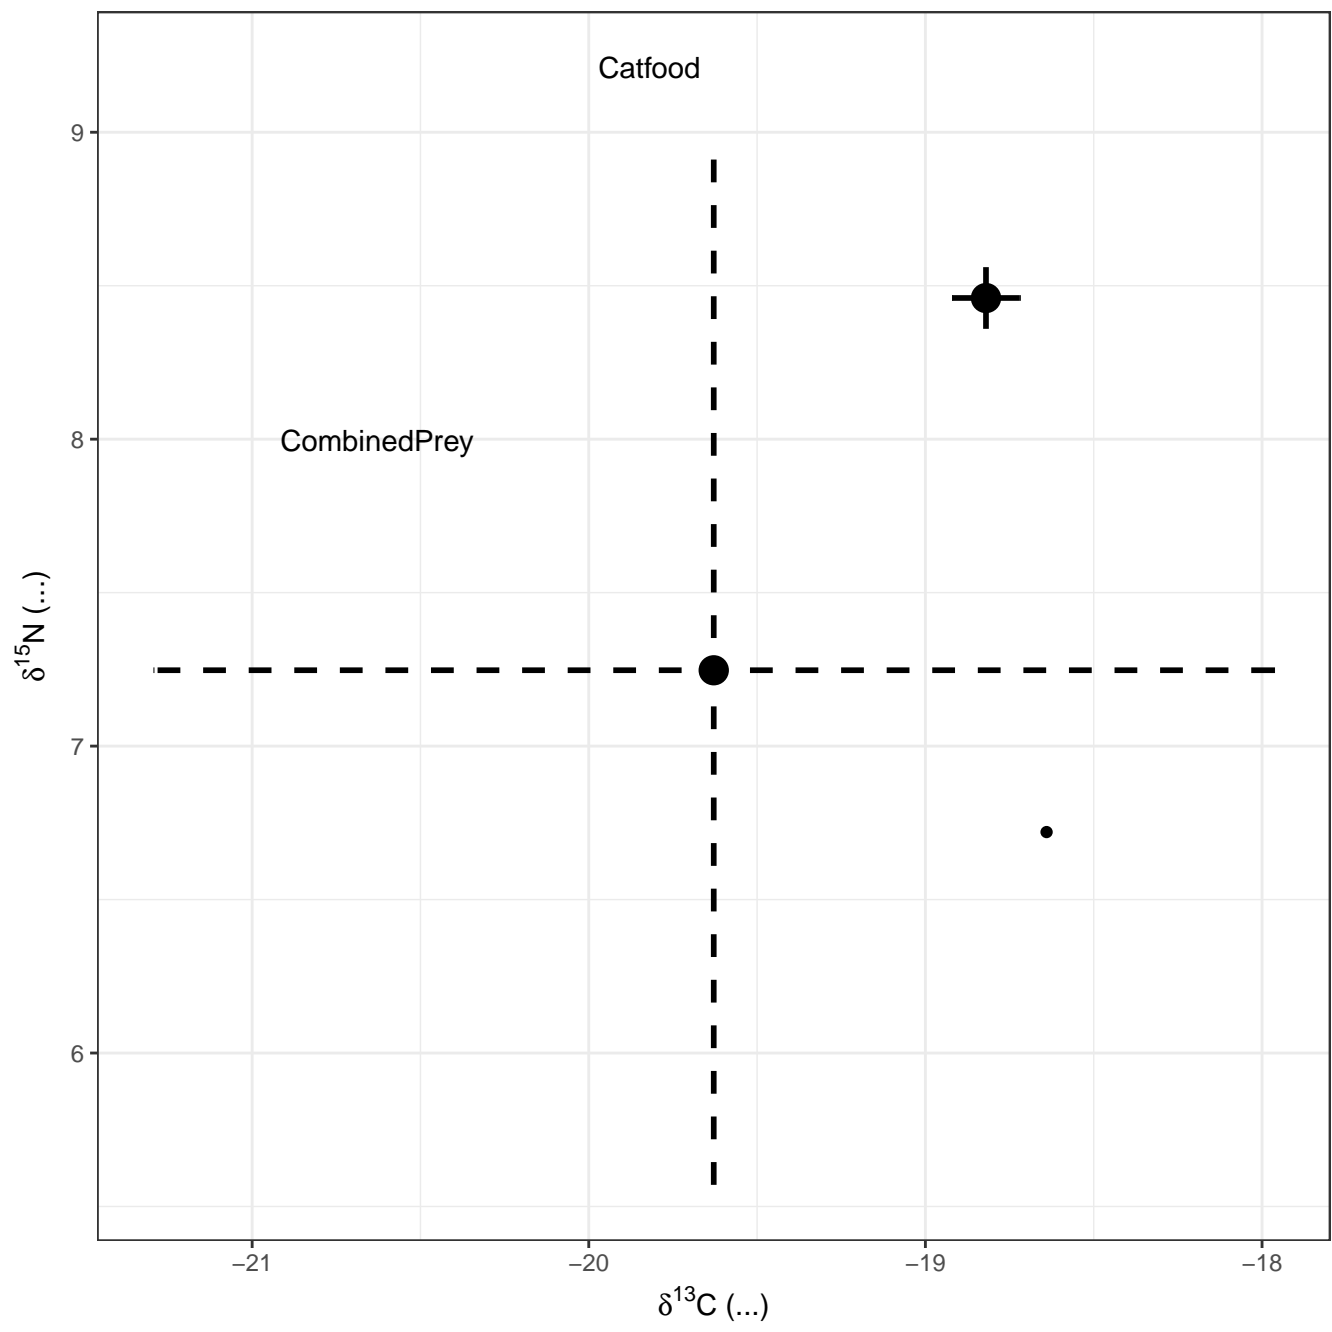

Supplement: Isospace_plots.zip [file Isospace_plots.zip]

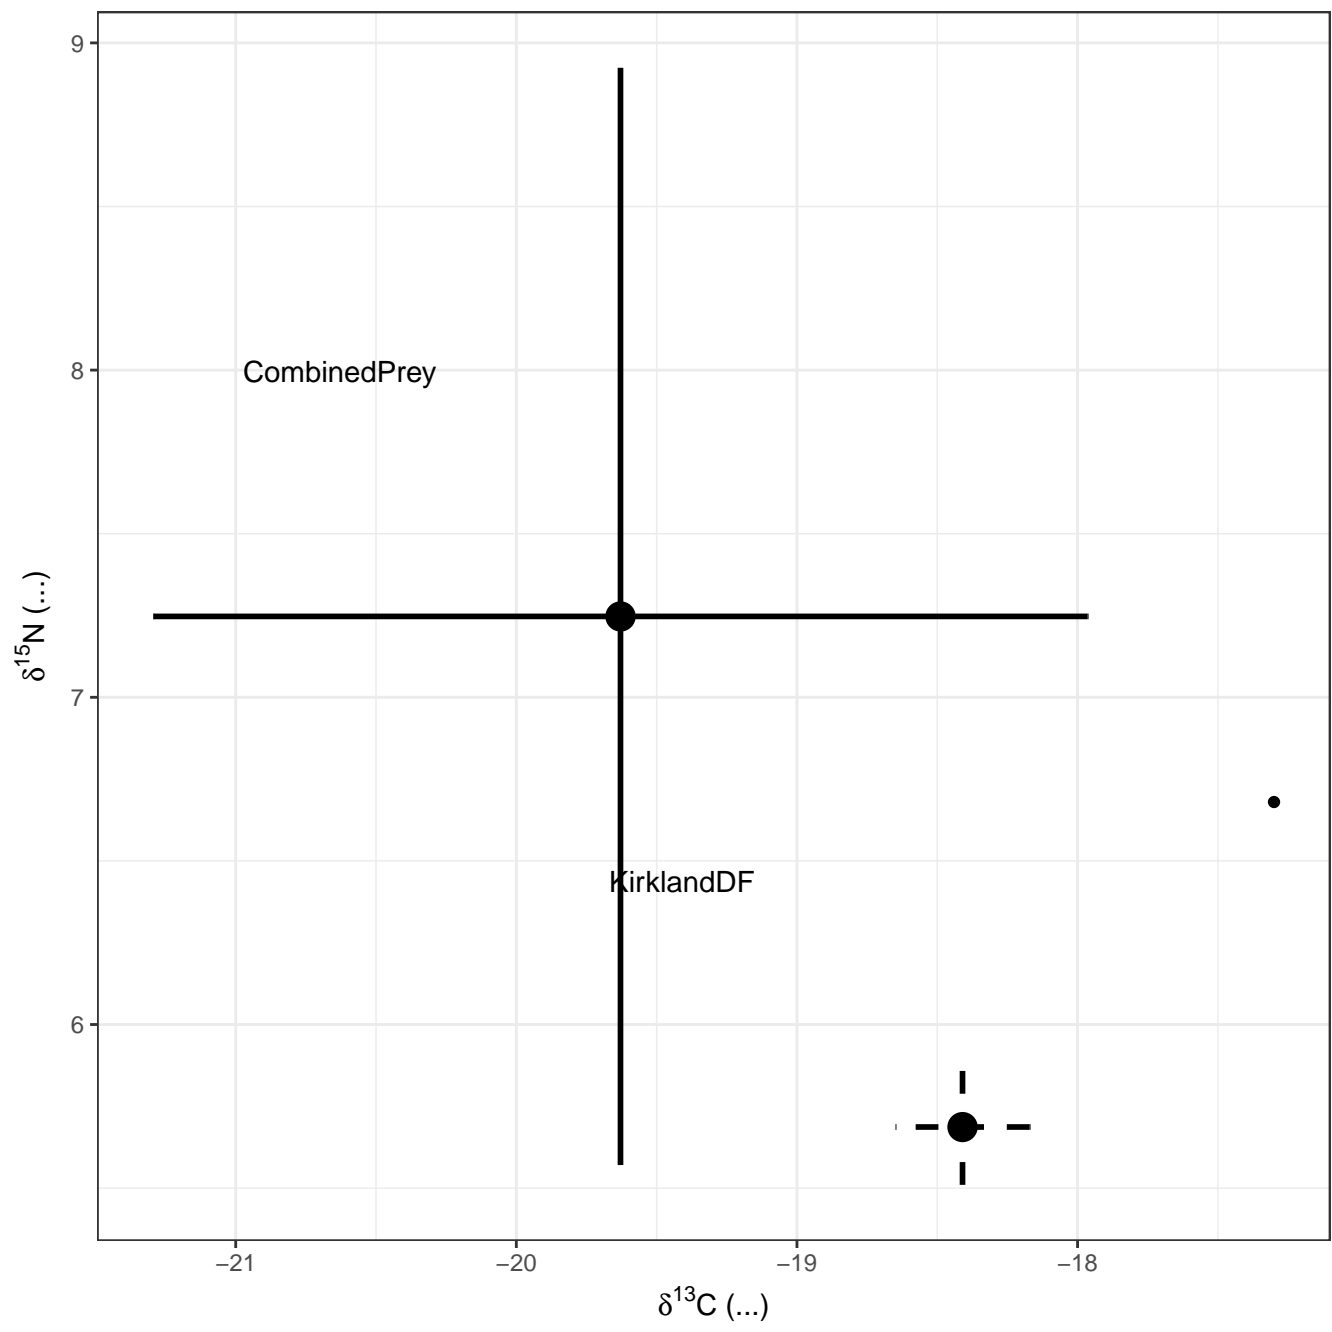

Supplement: Isospace_plots.zip [file Isospace_plots.zip]

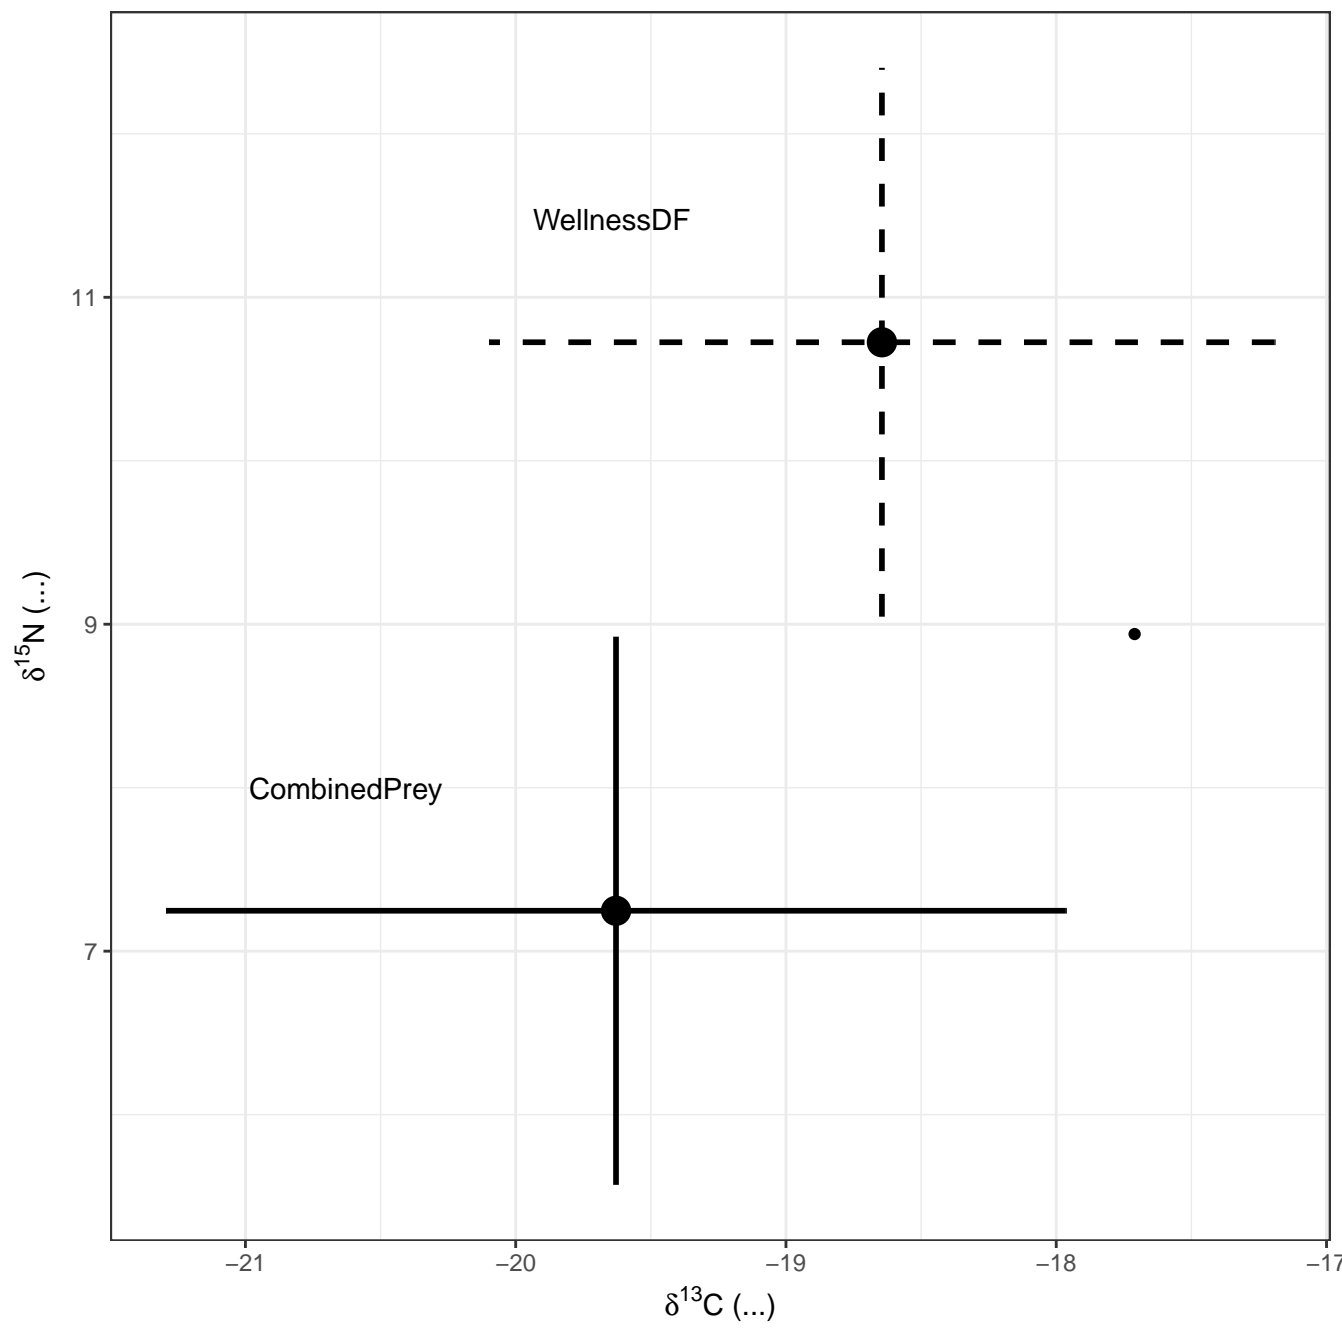

Supplement: Isospace_plots.zip [file Isospace_plots.zip]

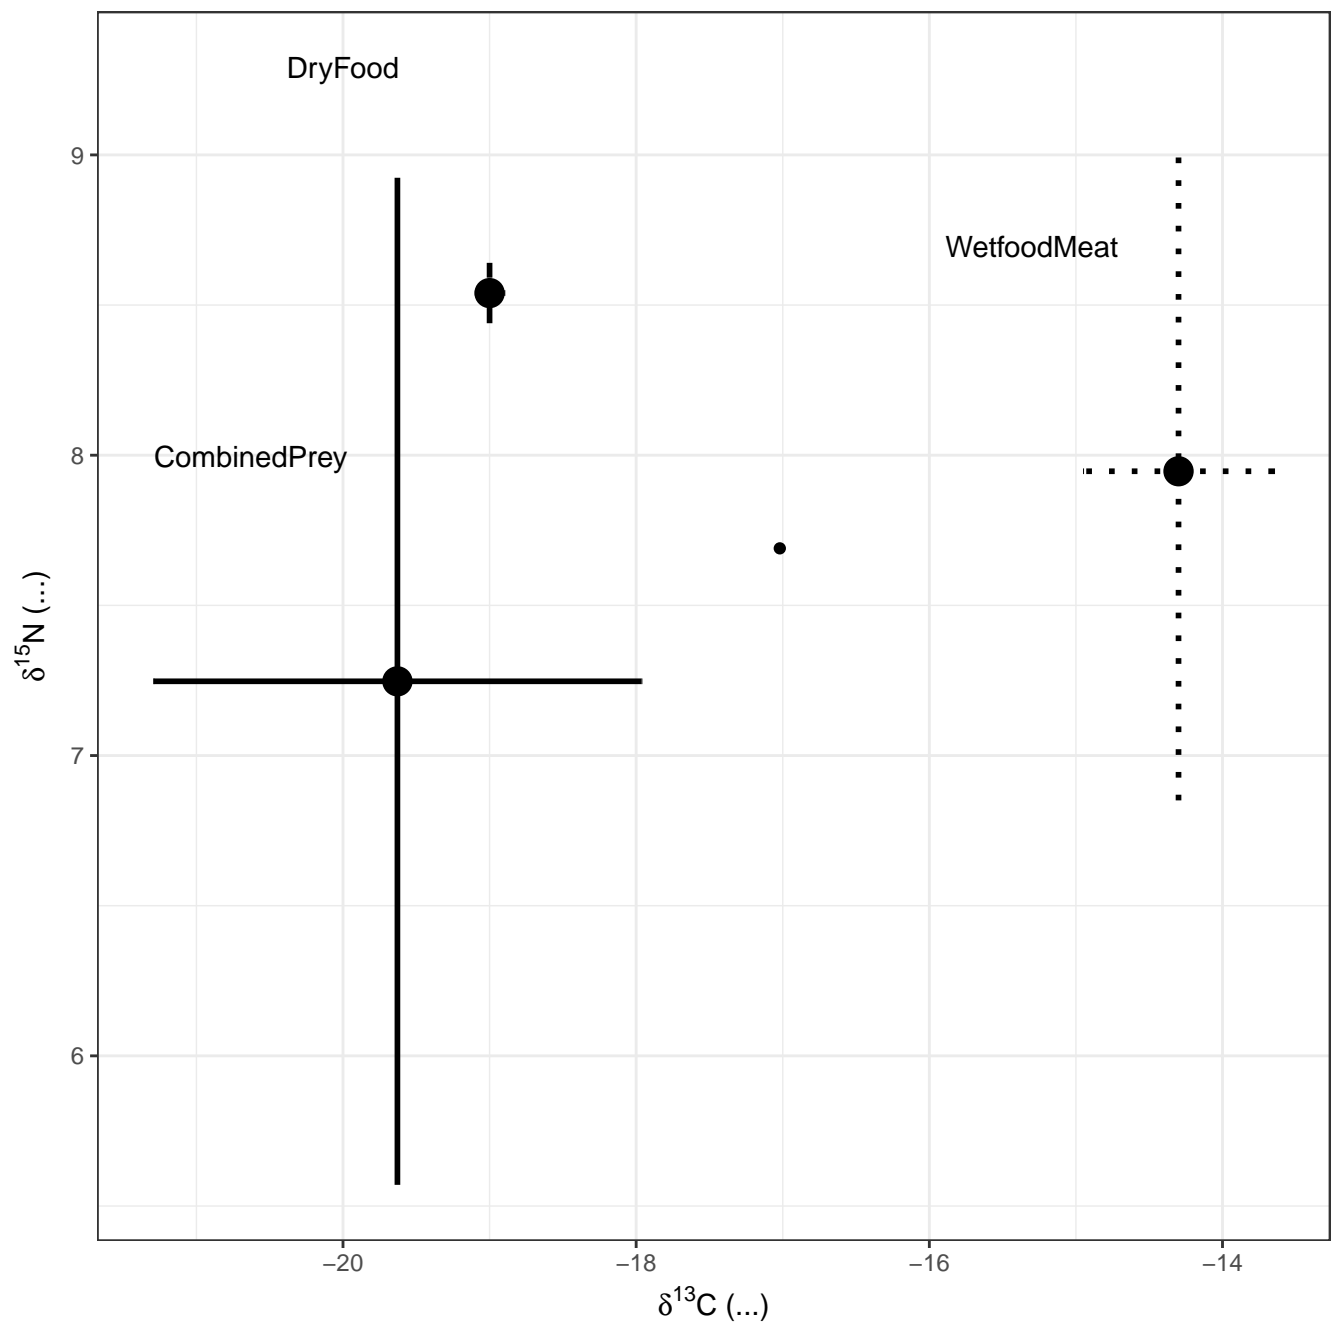

Supplement: Isospace_plots.zip [file Isospace_plots.zip]

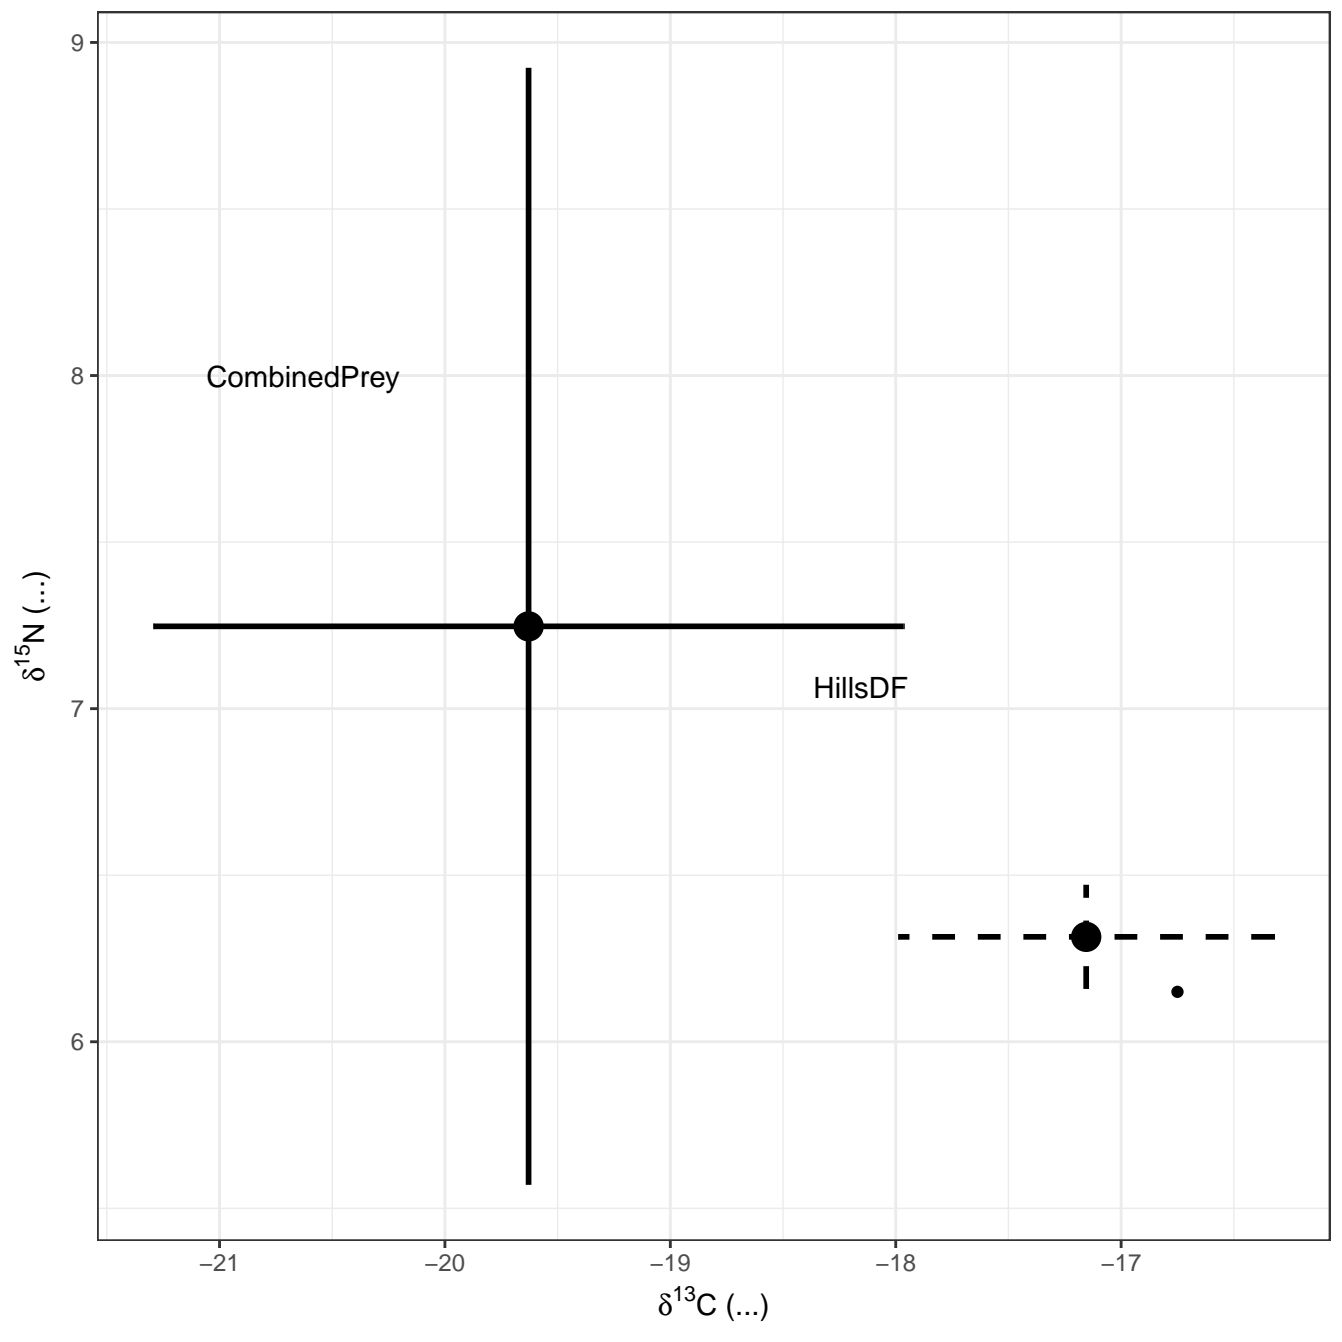

Supplement: Isospace_plots.zip [file Isospace_plots.zip]

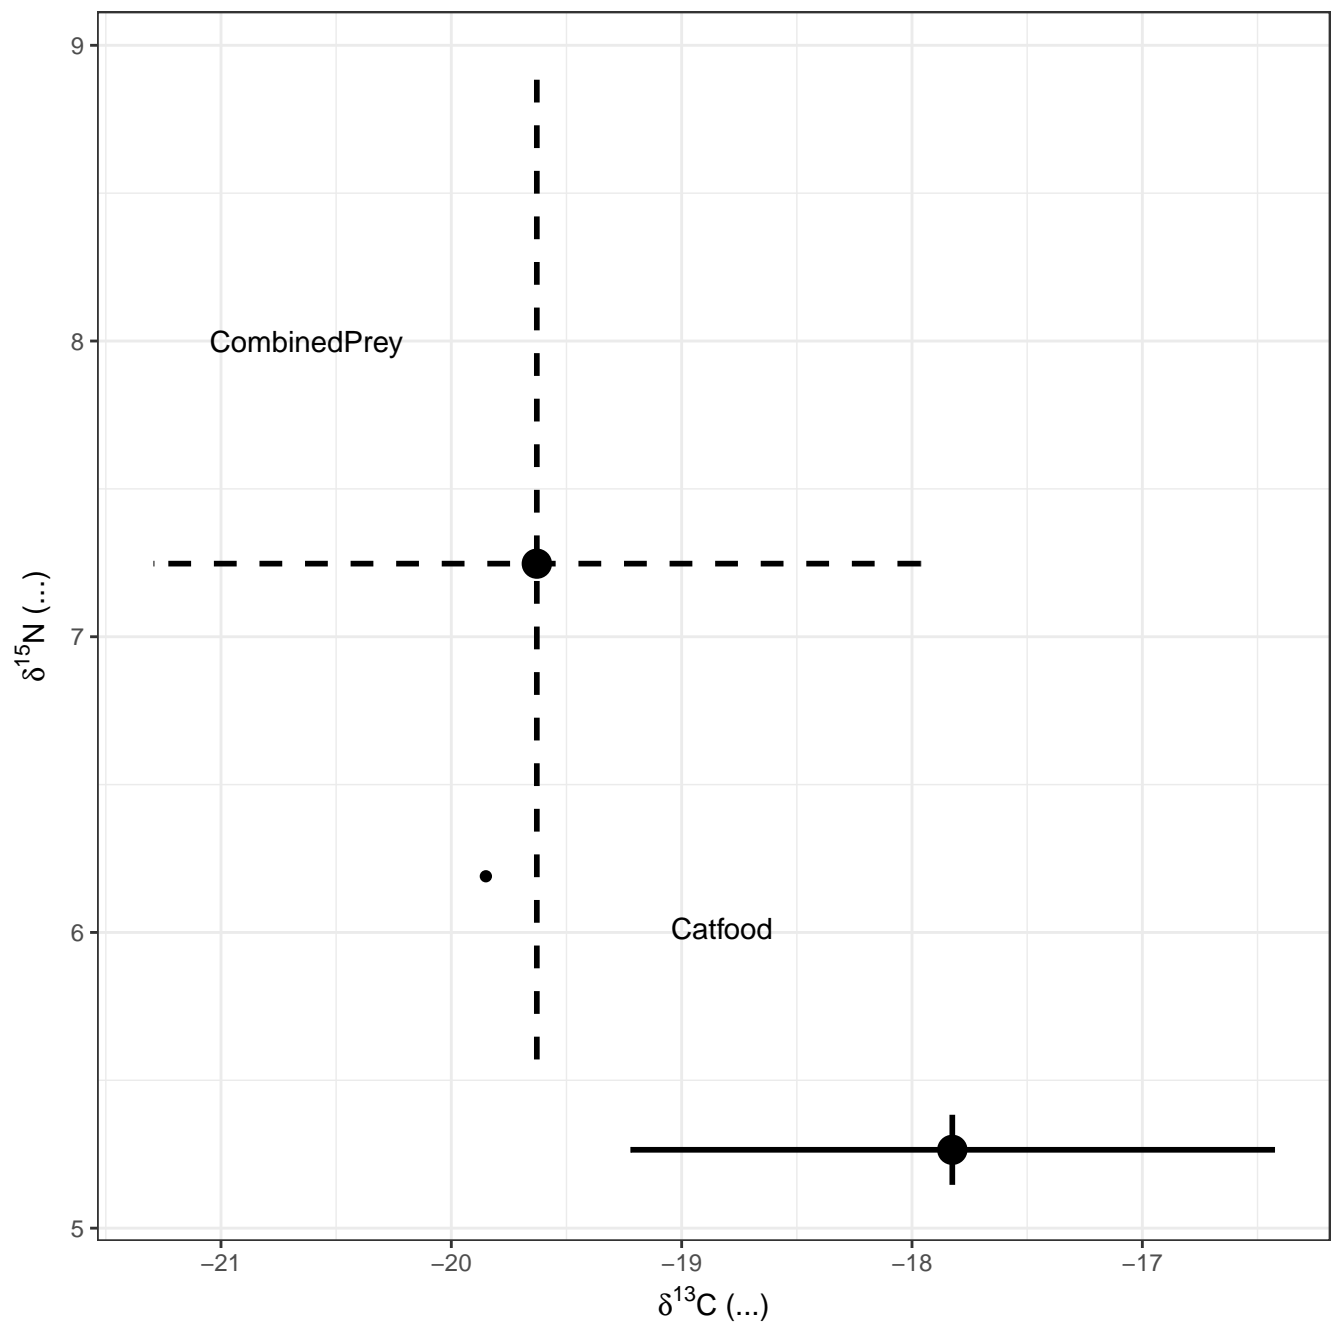

Supplement: Isospace_plots.zip [file Isospace_plots.zip]

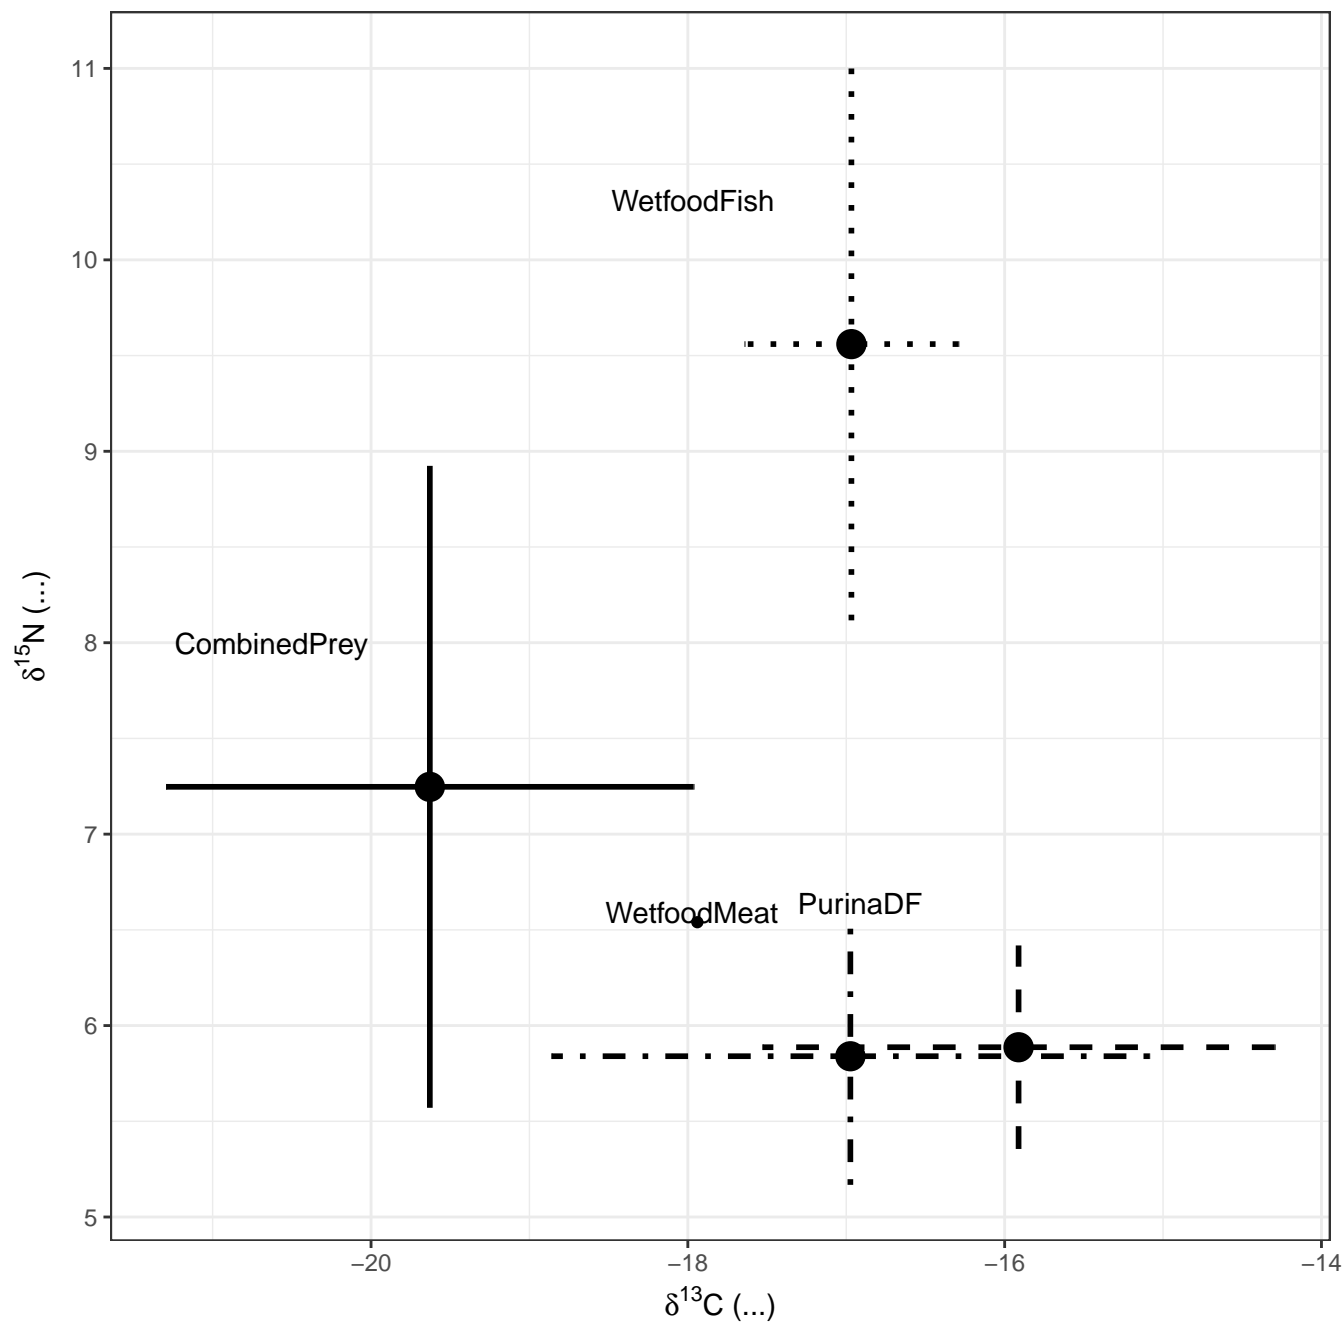

Supplement: Isospace_plots.zip [file Isospace_plots.zip]

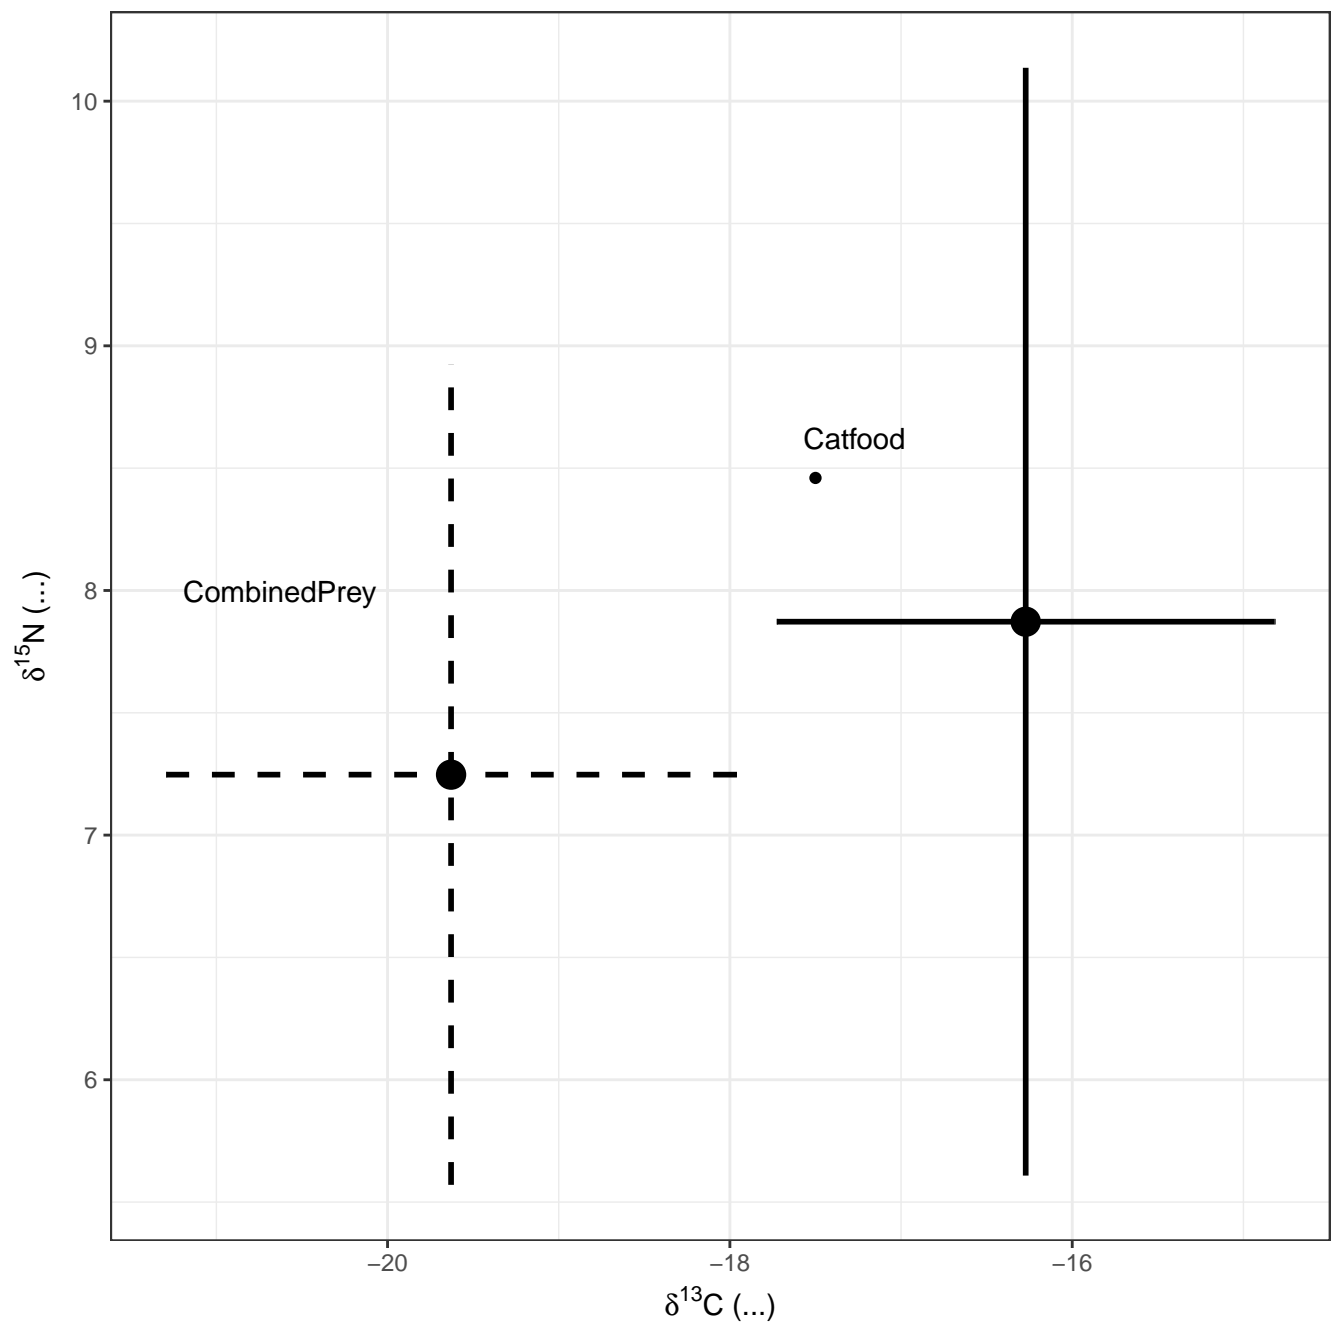

Supplement: Isospace_plots.zip [file Isospace_plots.zip]

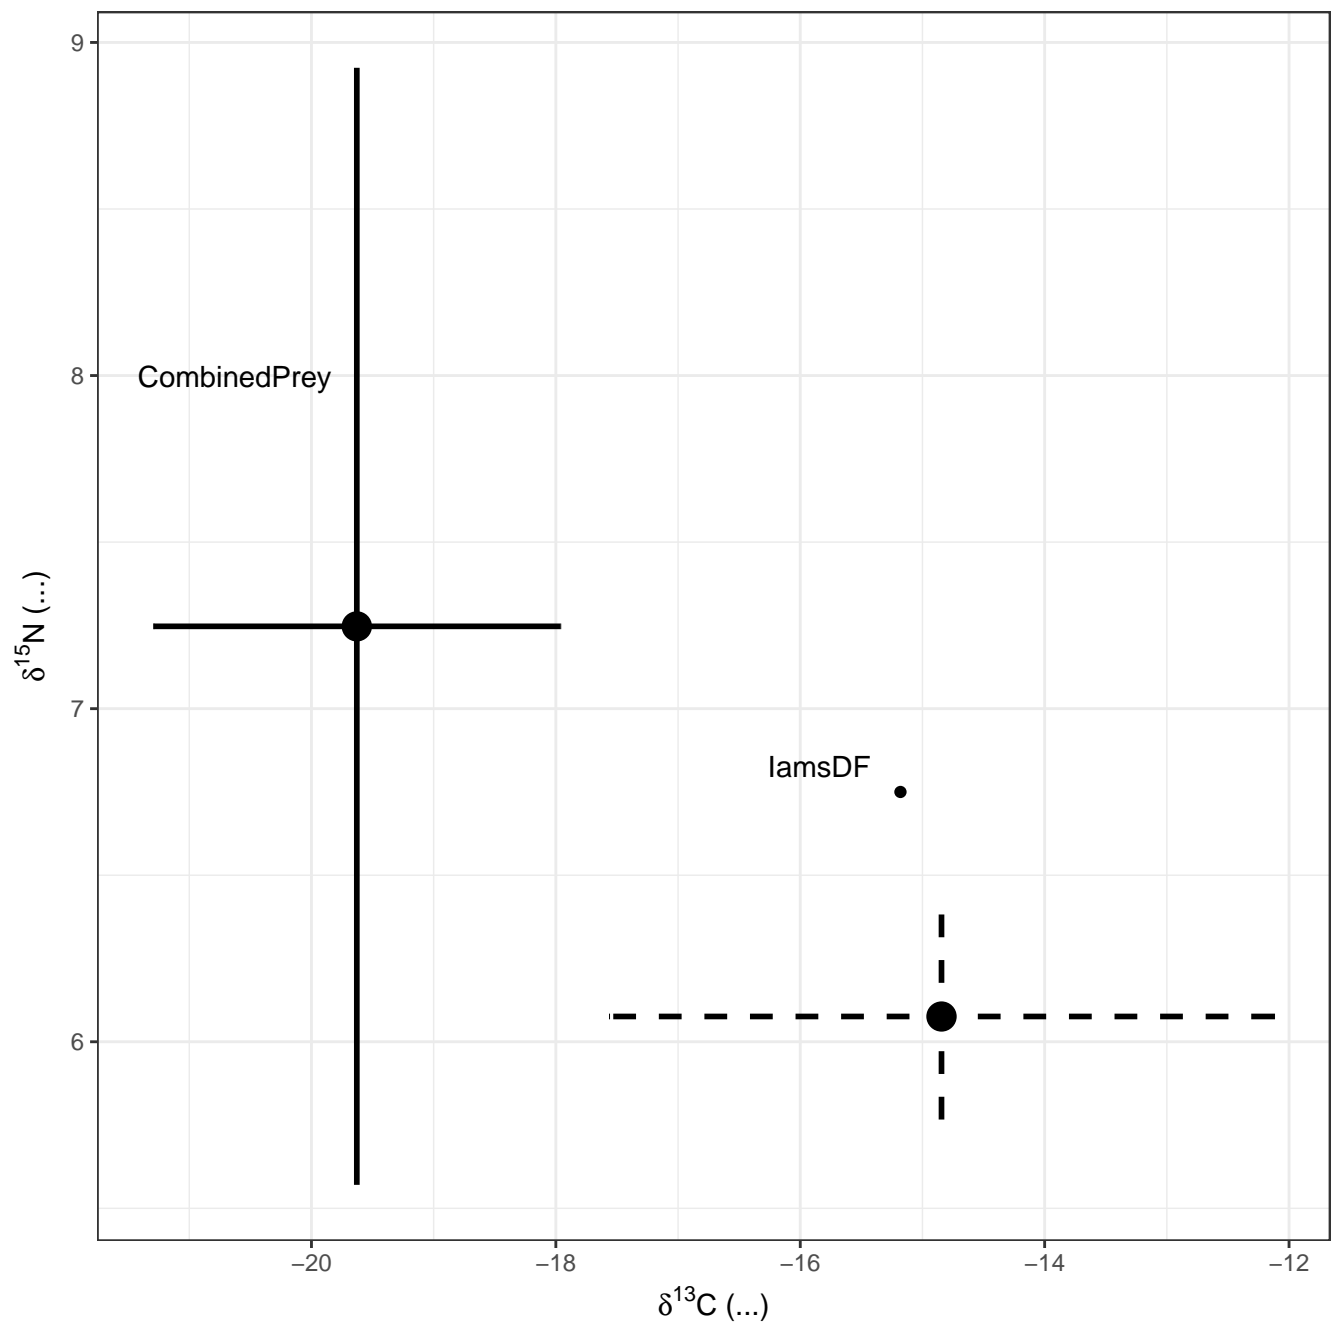

Supplement: Isospace_plots.zip [file Isospace_plots.zip]

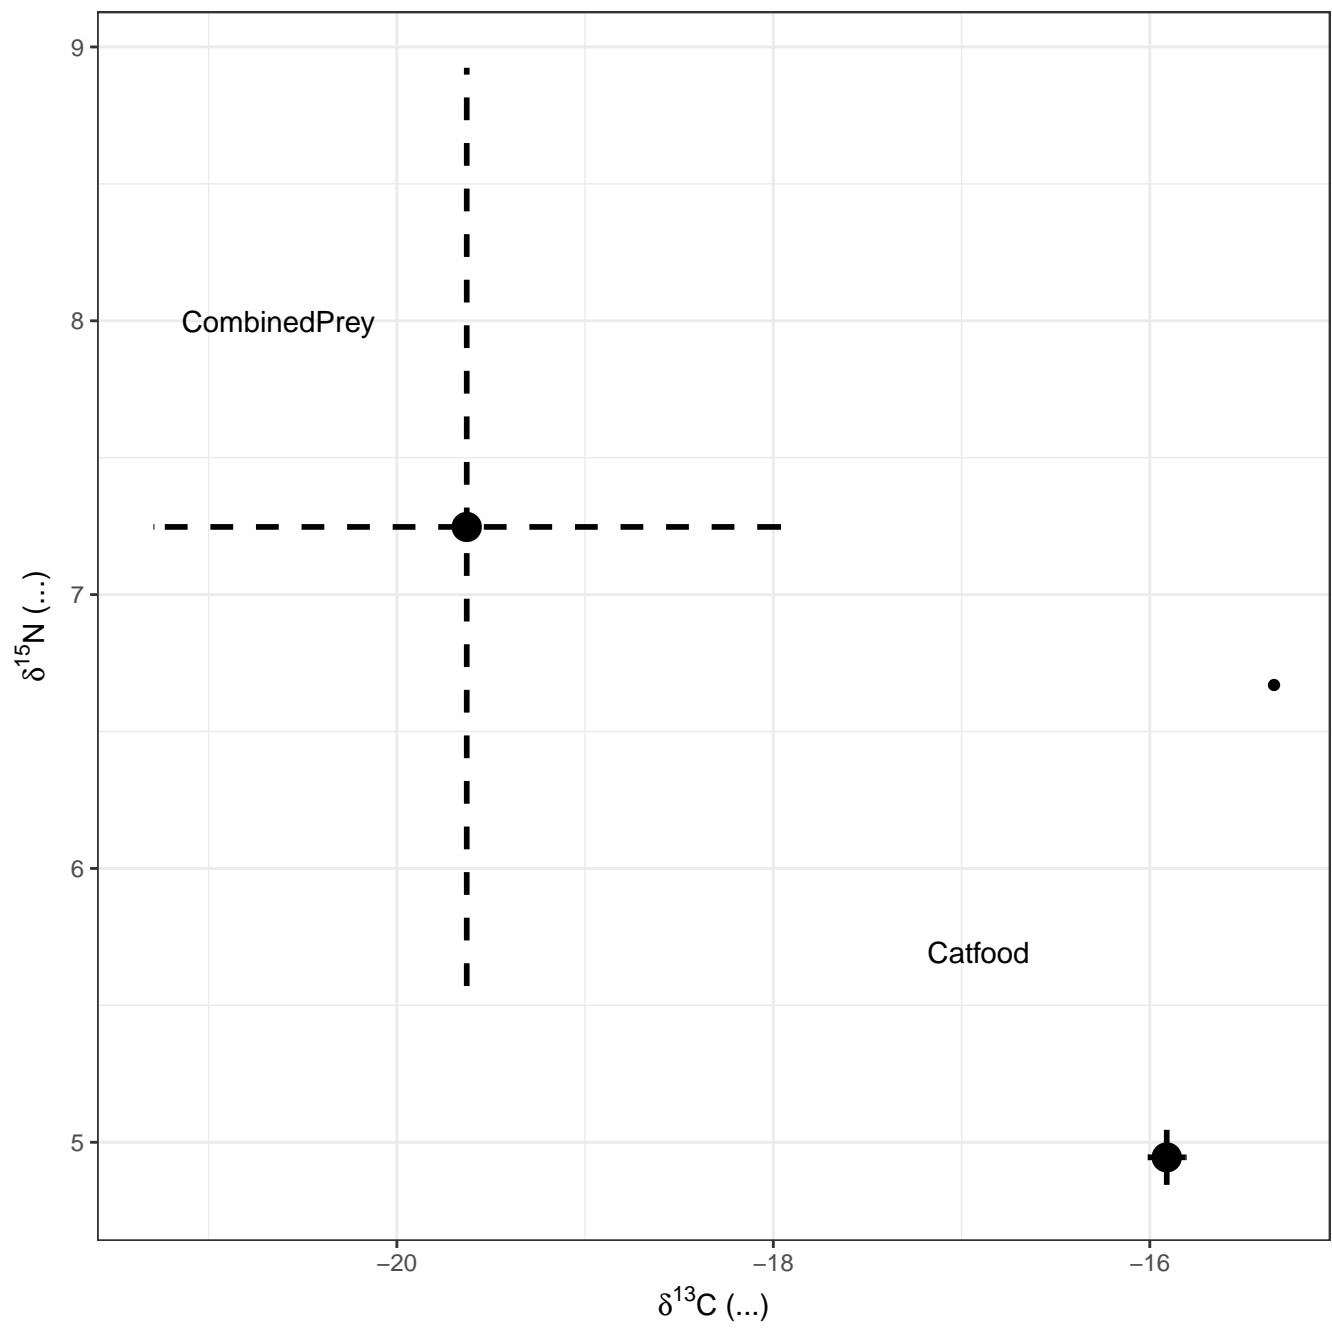

Supplement: Isospace_plots.zip [file Isospace_plots.zip]

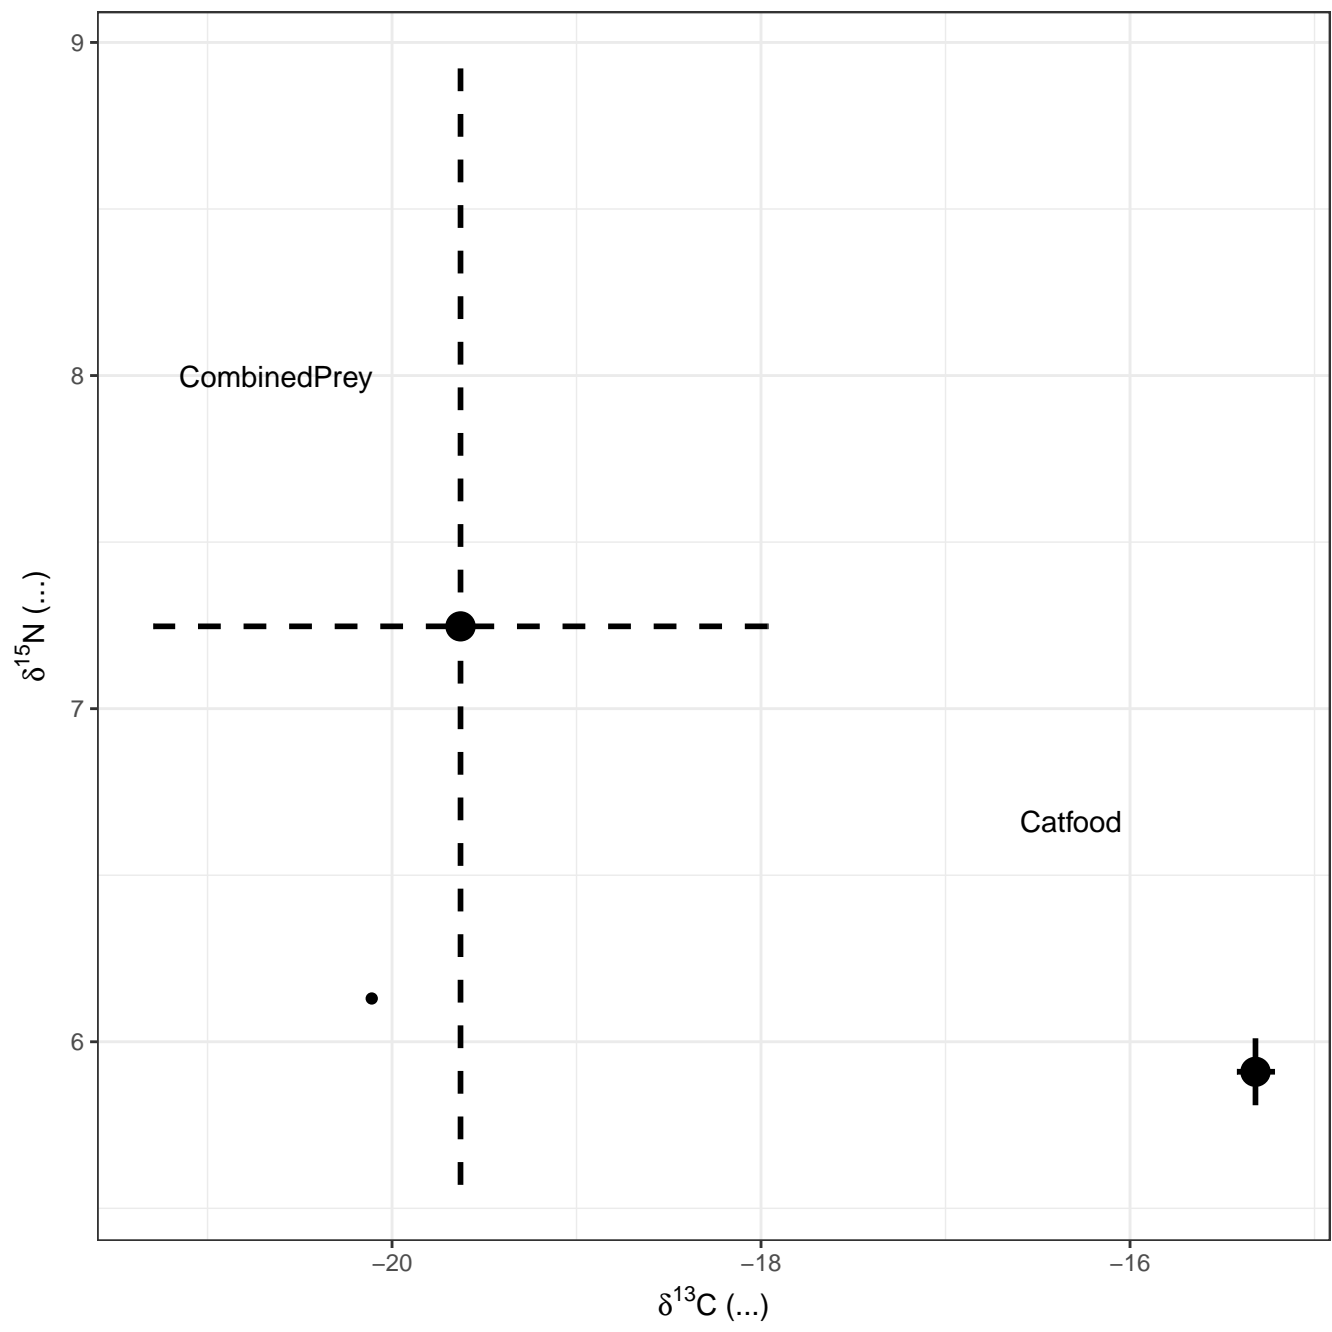

Supplement: Isospace_plots.zip [file Isospace_plots.zip]

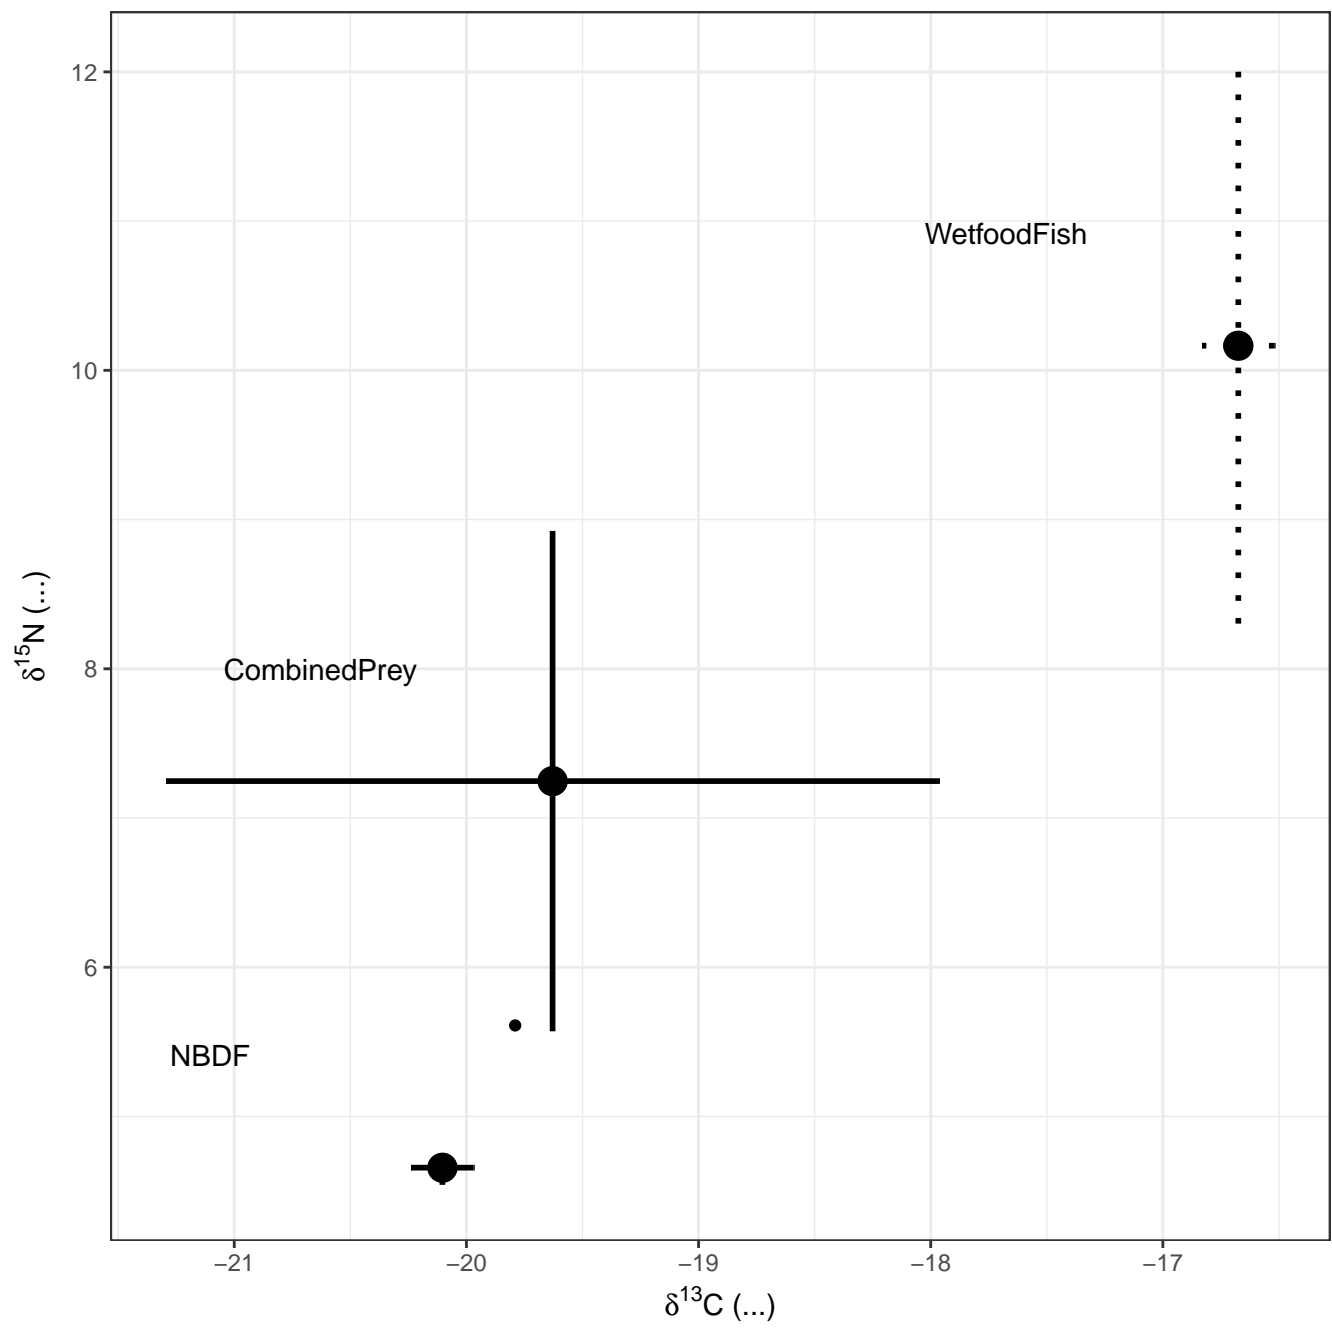

Supplement: Isospace_plots.zip [file Isospace_plots.zip]

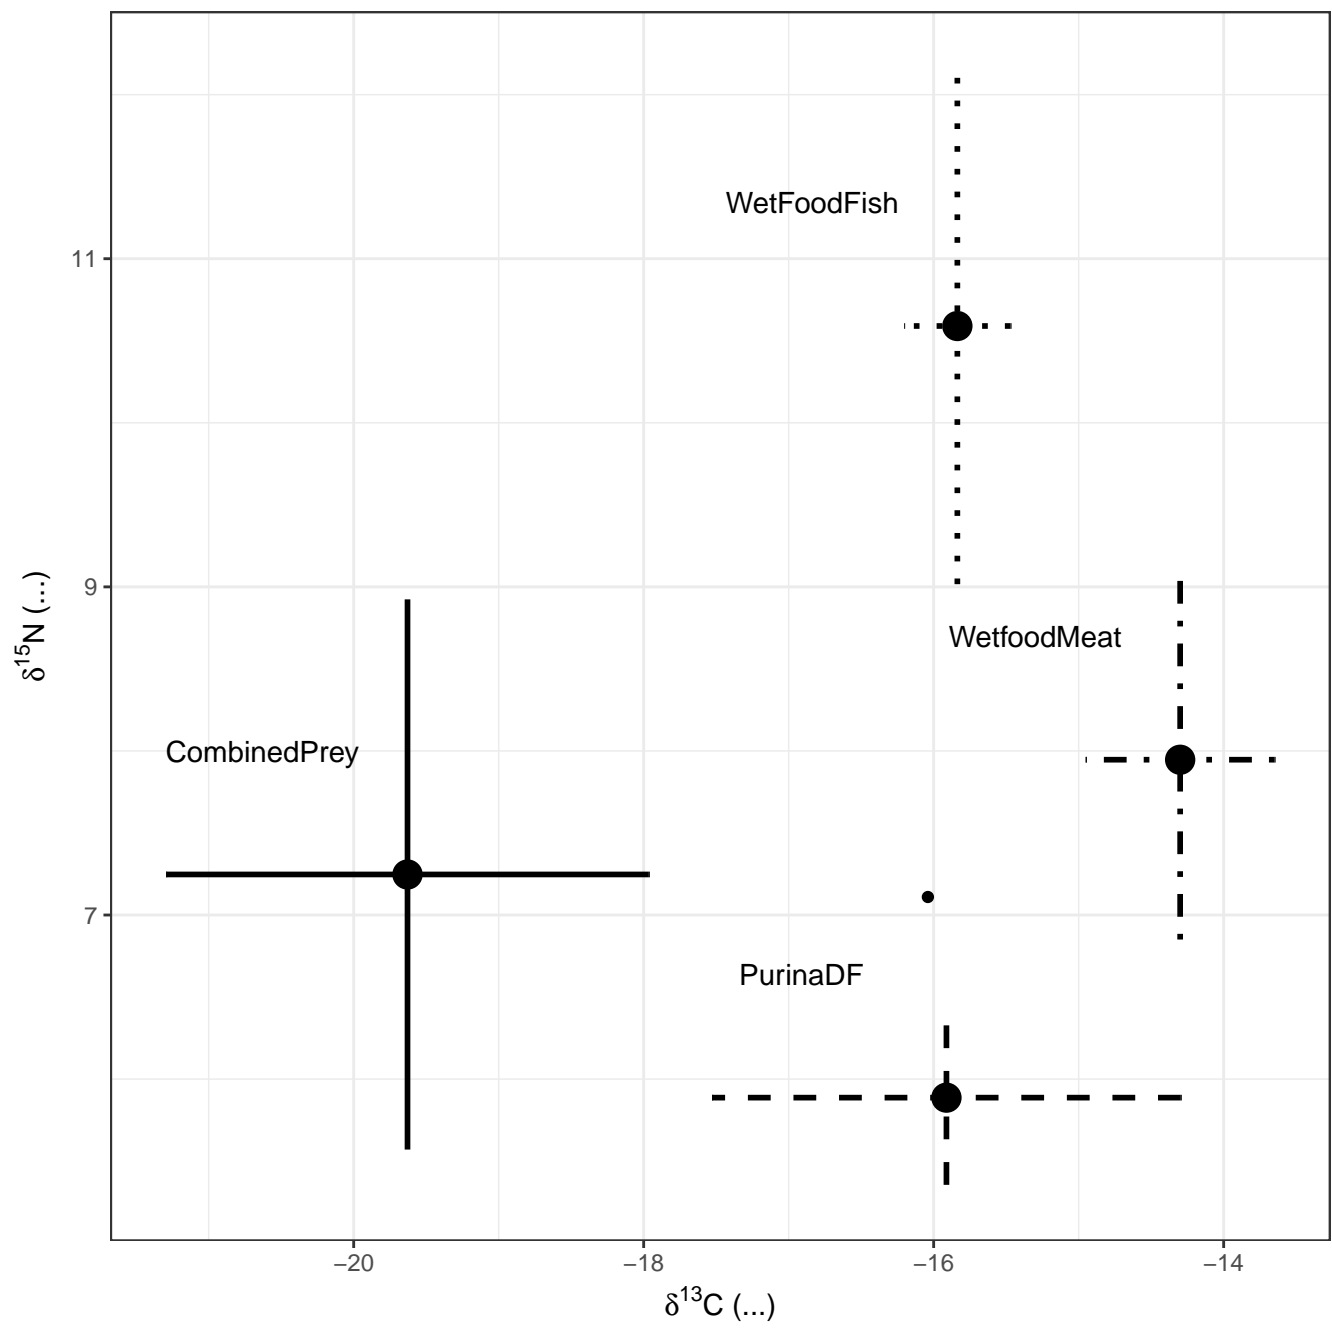

Supplement: Isospace_plots.zip [file Isospace_plots.zip]

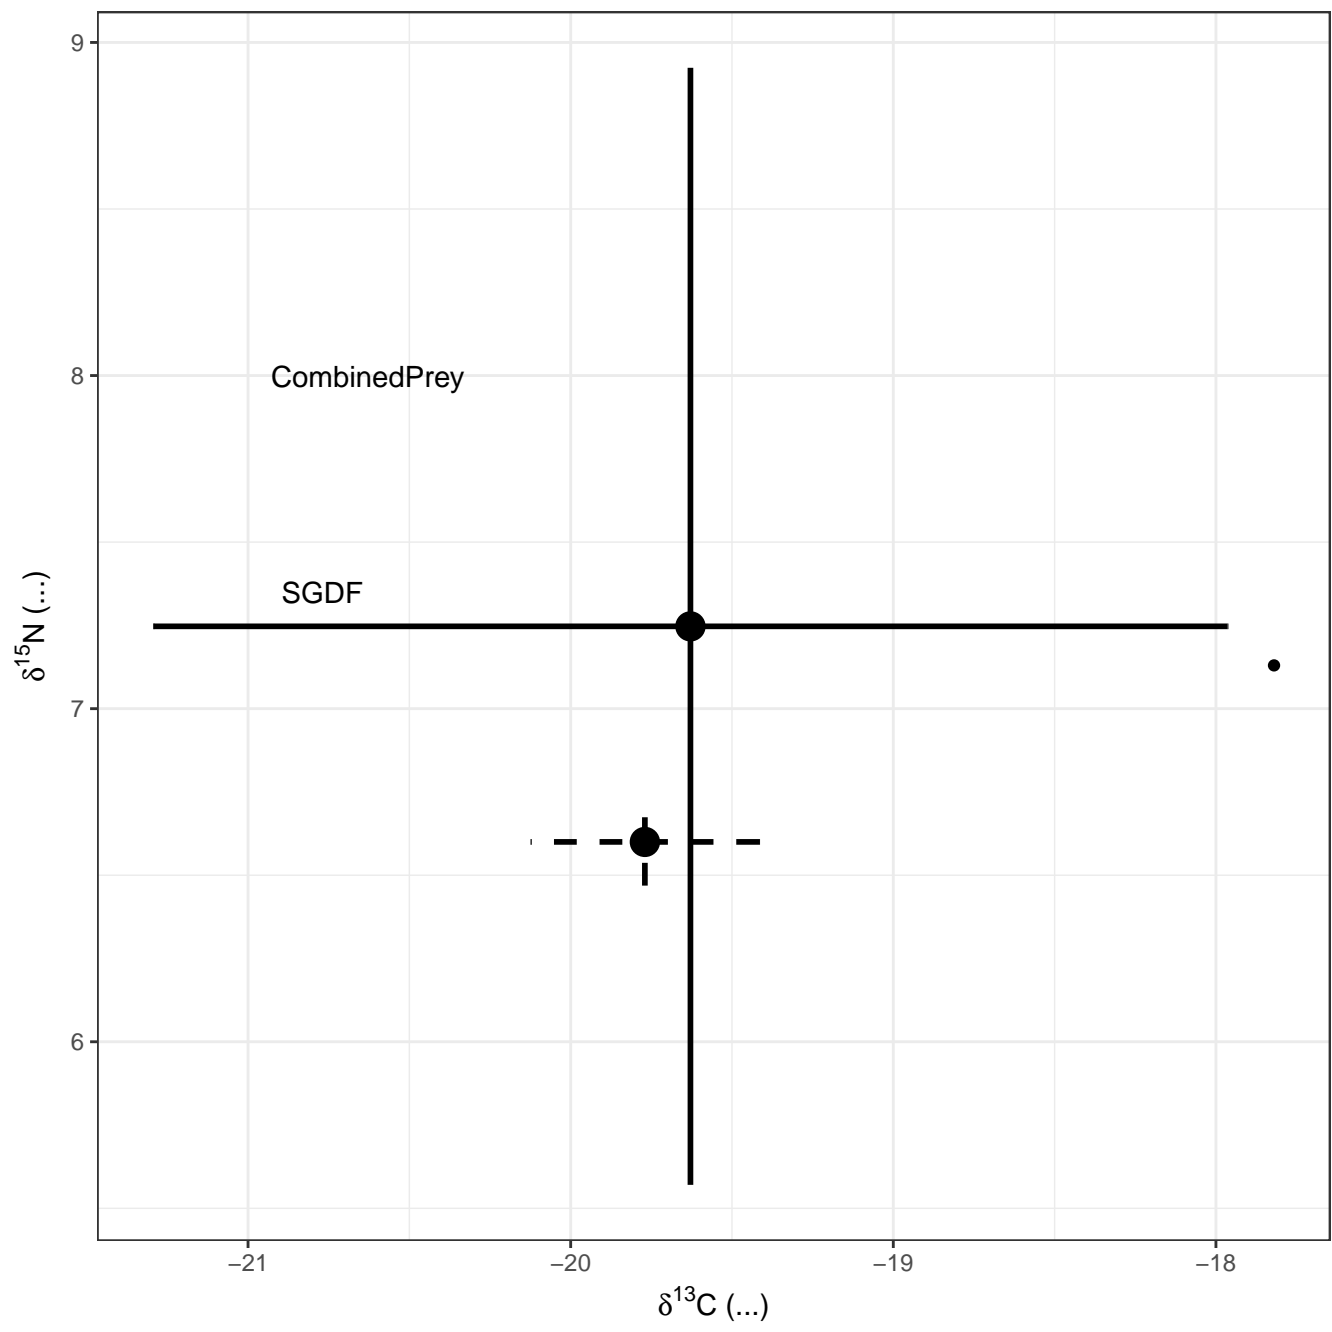

Supplement: Isospace_plots.zip [file Isospace_plots.zip]

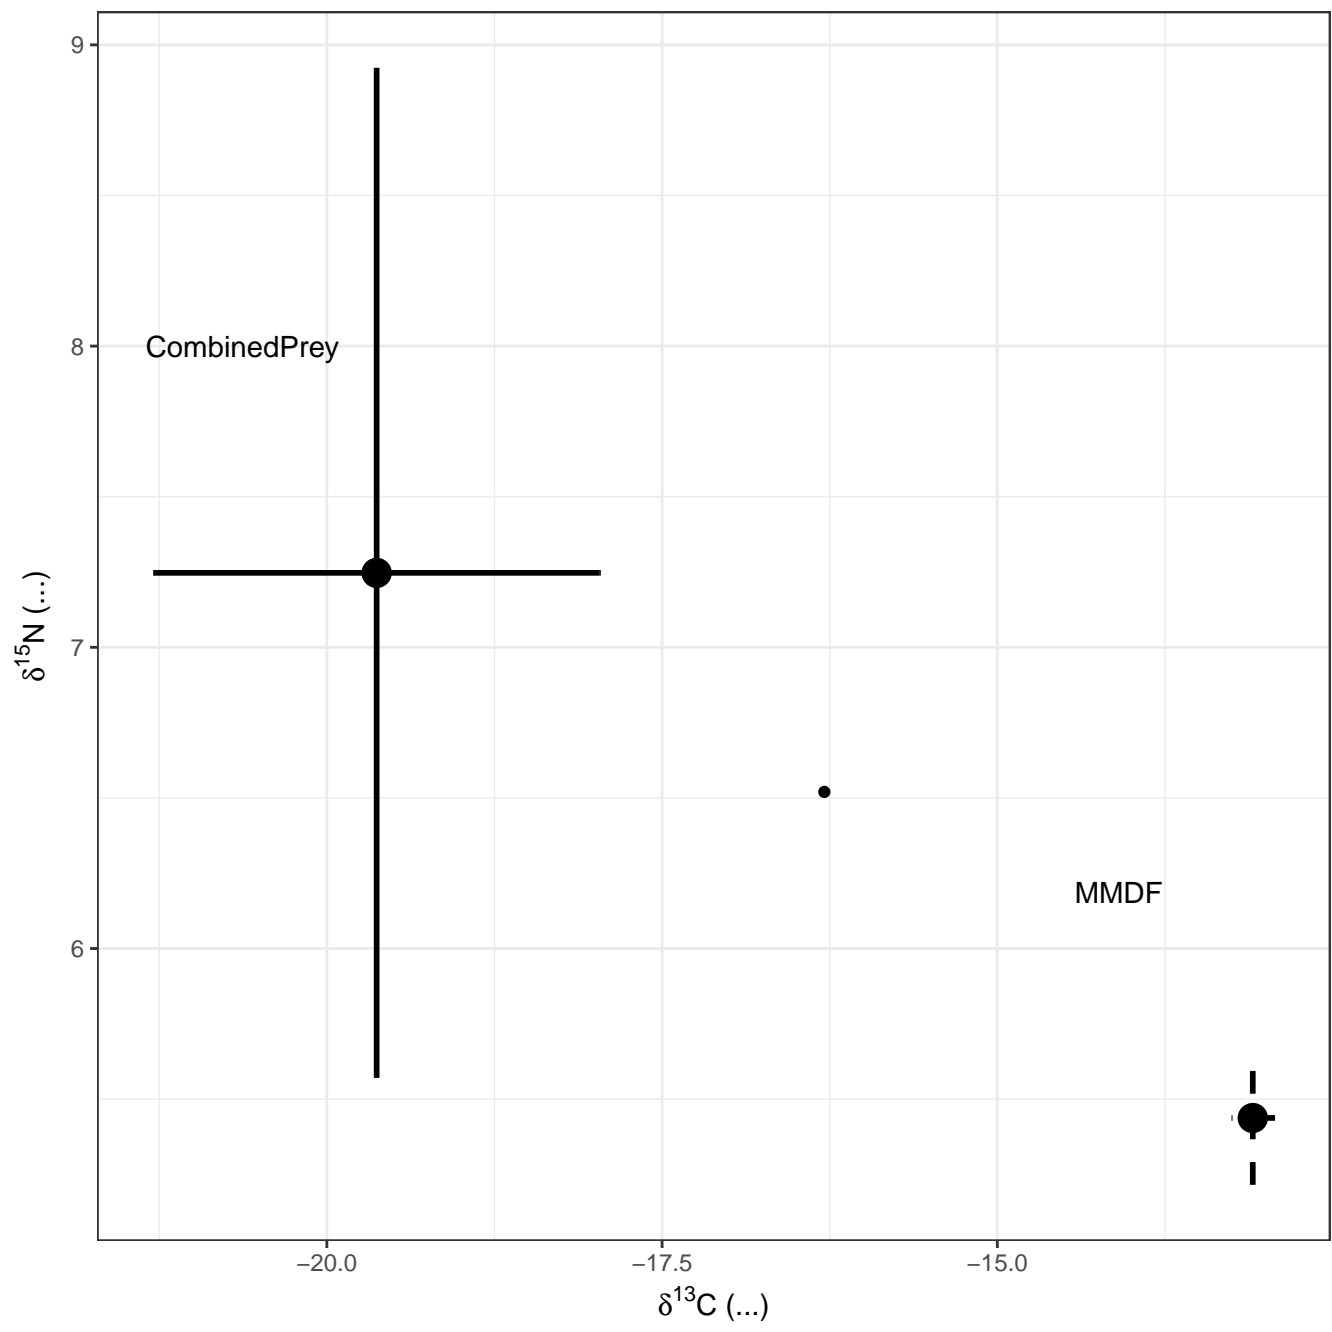

Supplement: Isospace_plots.zip [file Isospace_plots.zip]

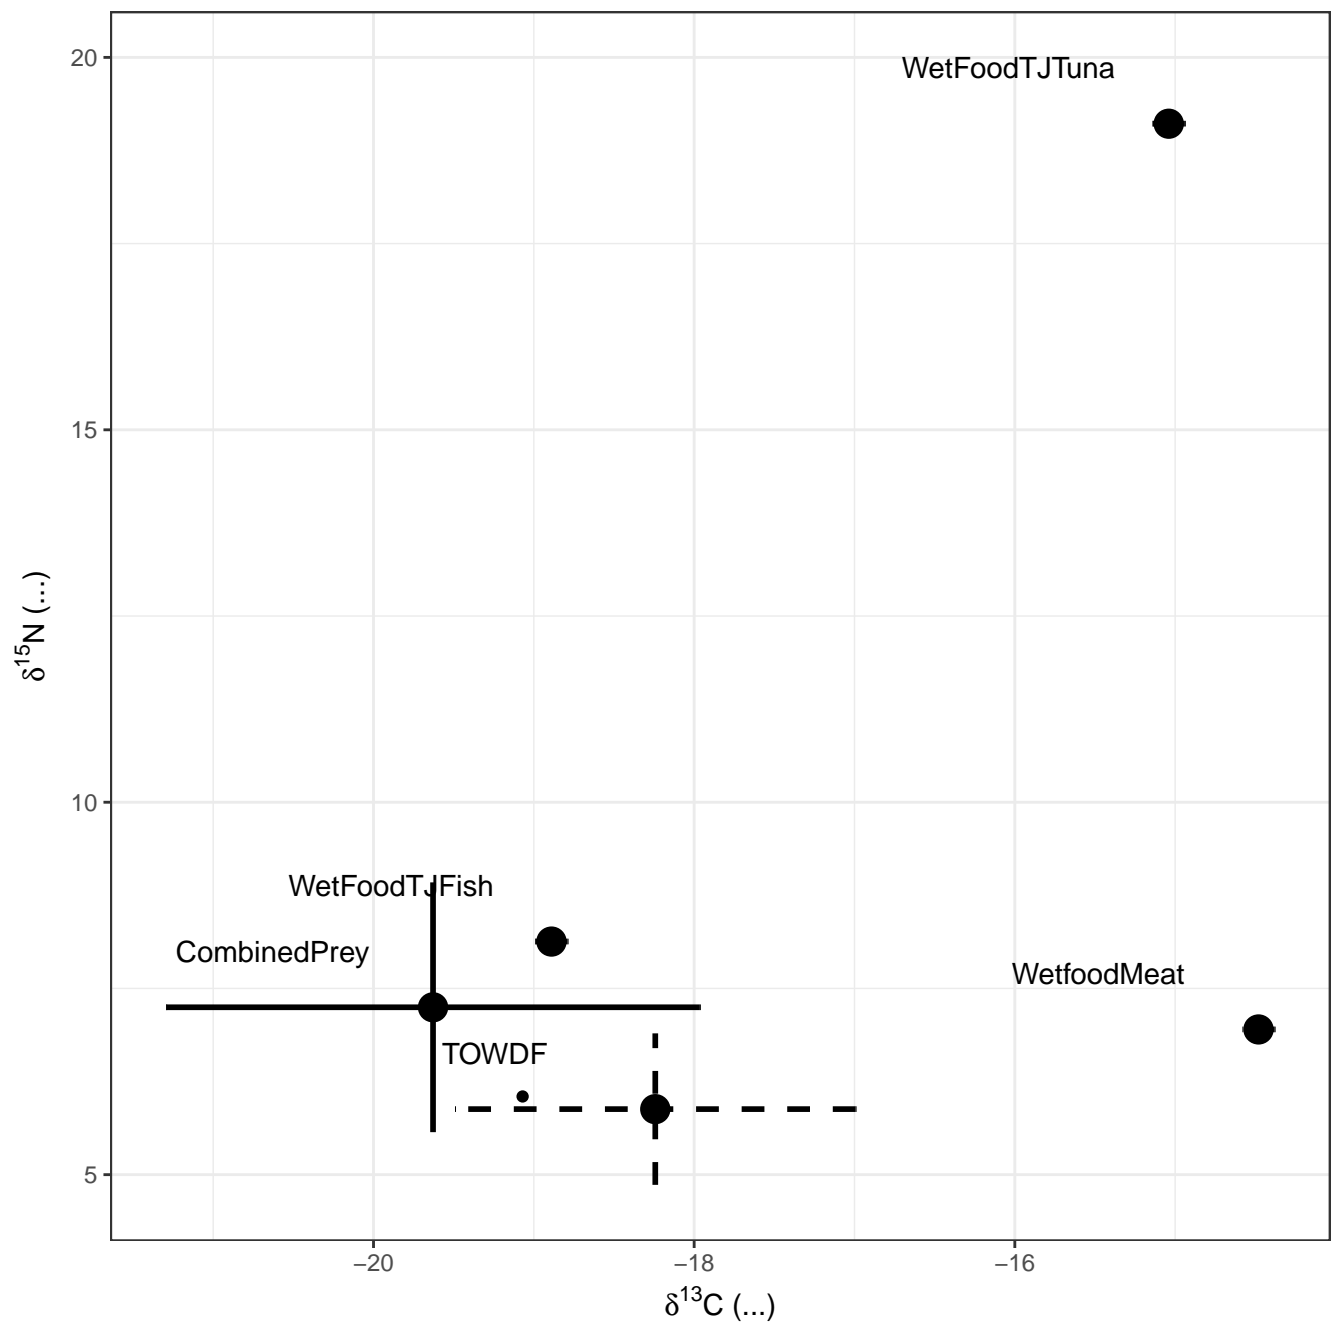

Supplement: Isospace_plots.zip [file Isospace_plots.zip]

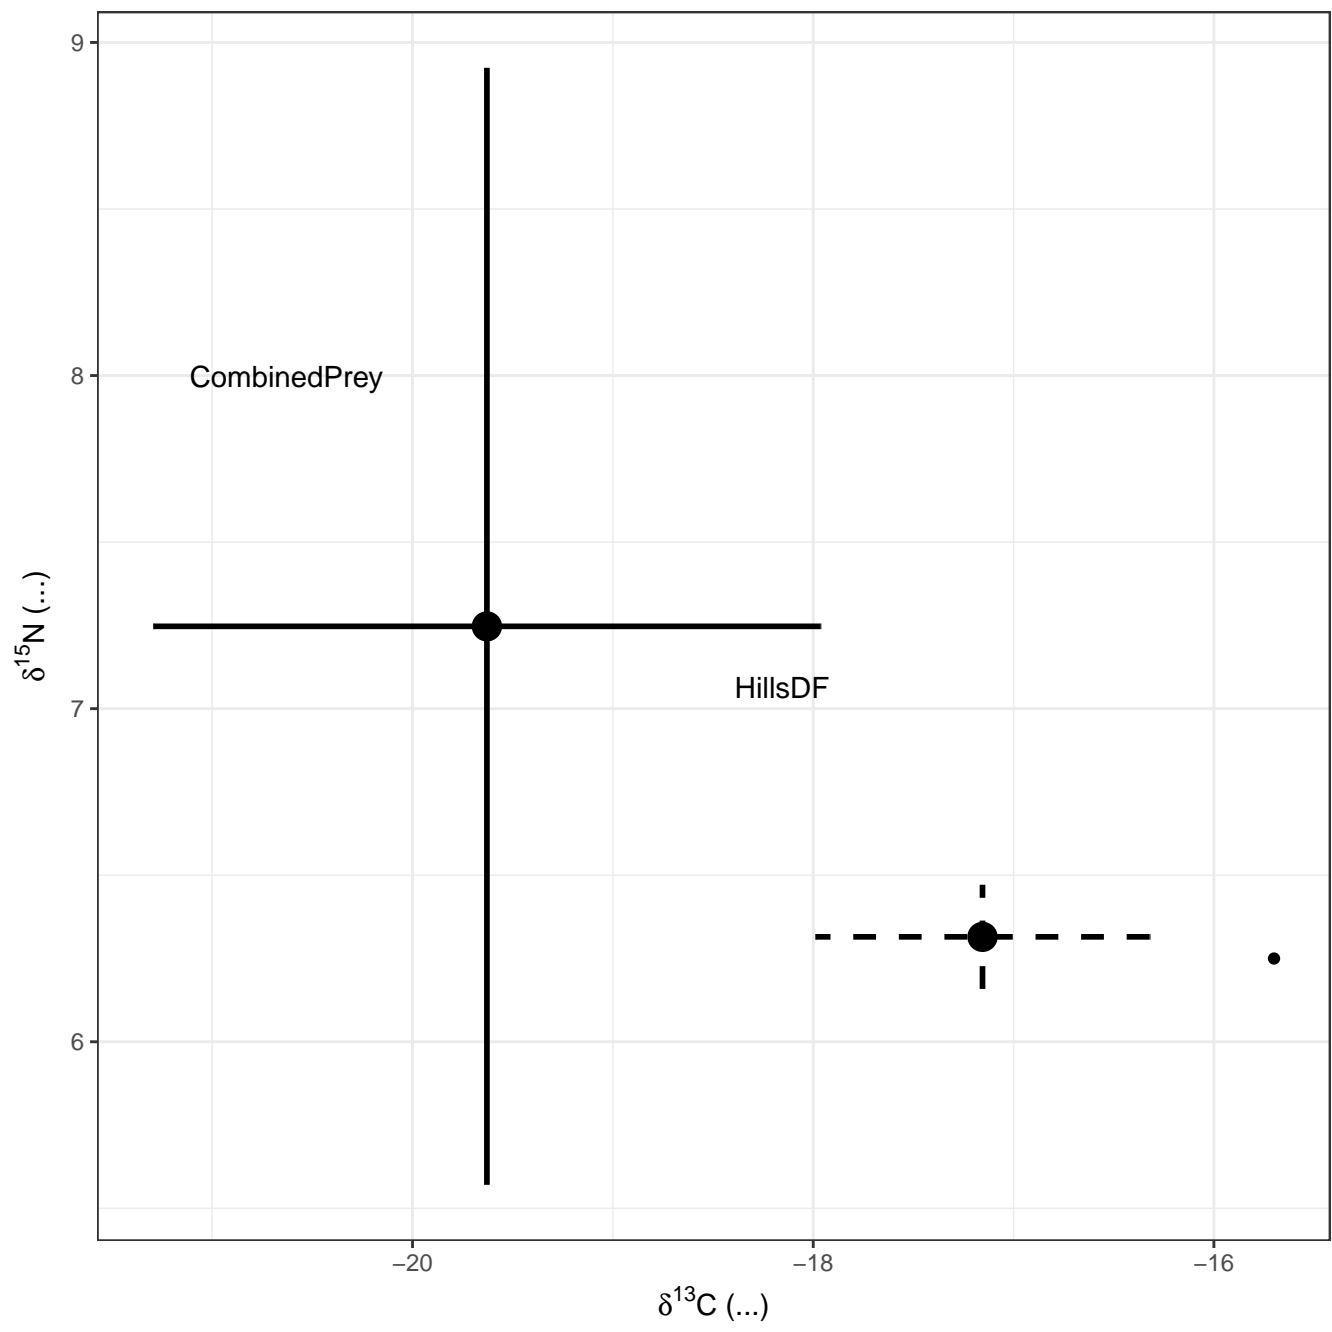

Supplement: Isospace_plots.zip [file Isospace_plots.zip]

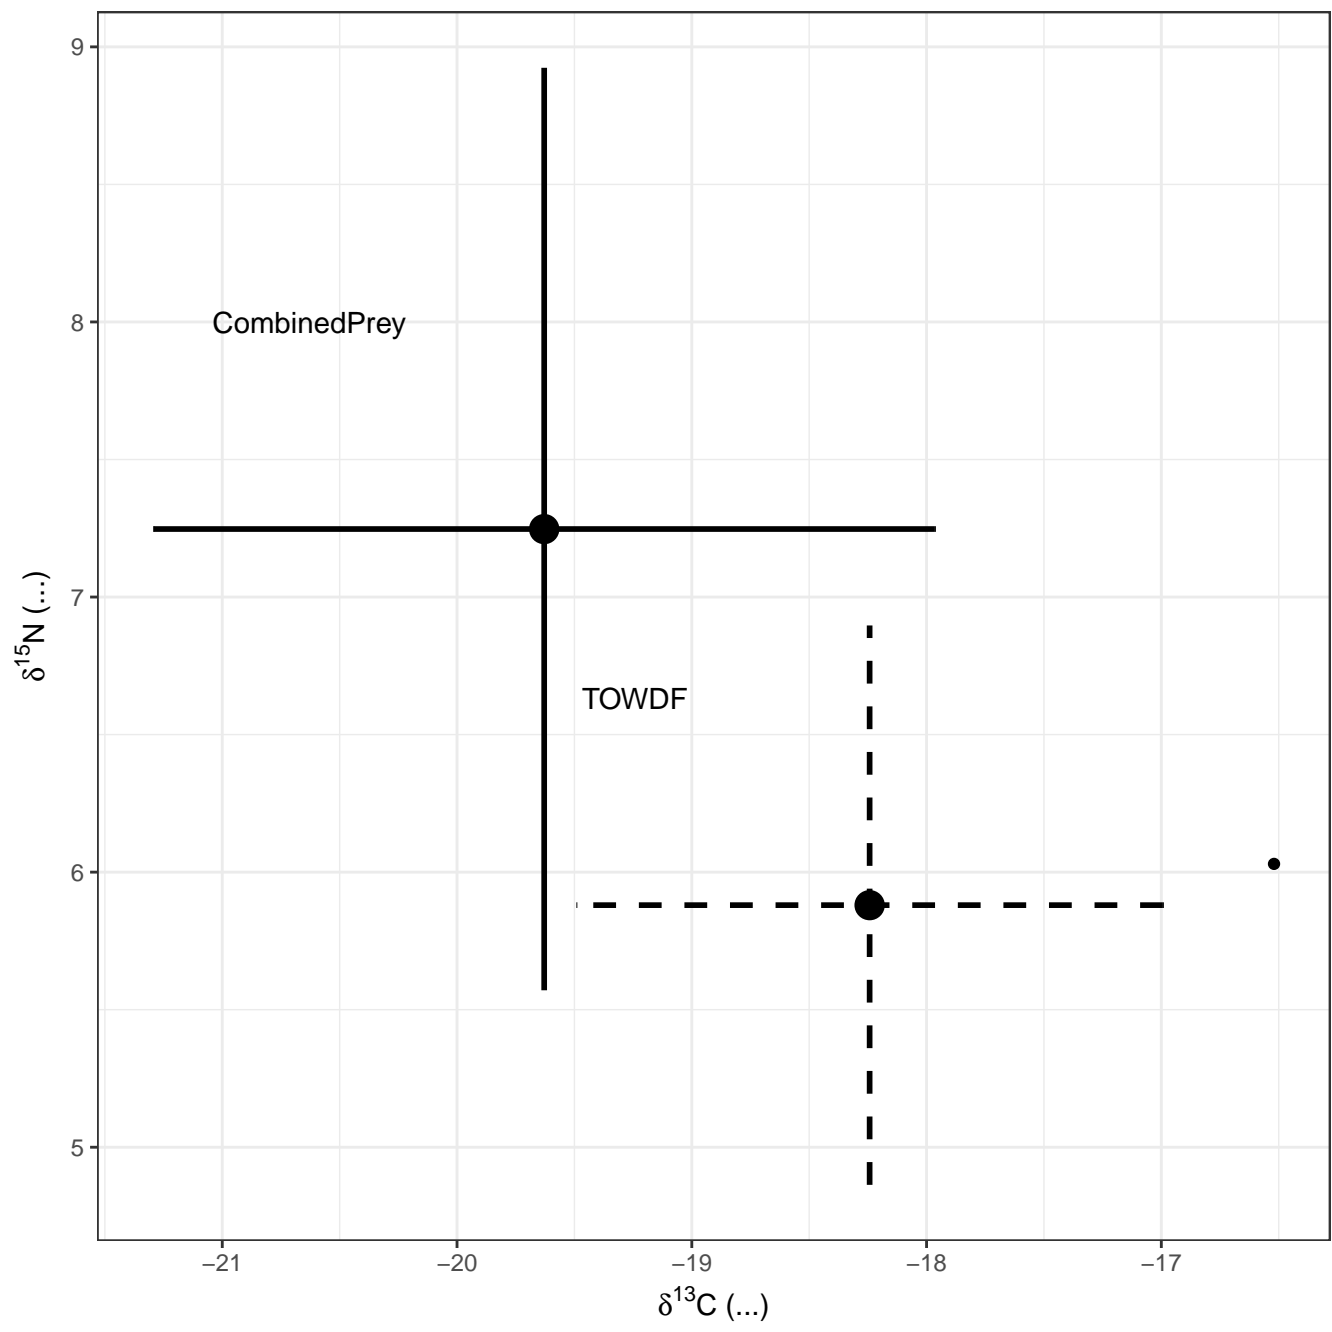

Supplement: Isospace_plots.zip [file Isospace_plots.zip]

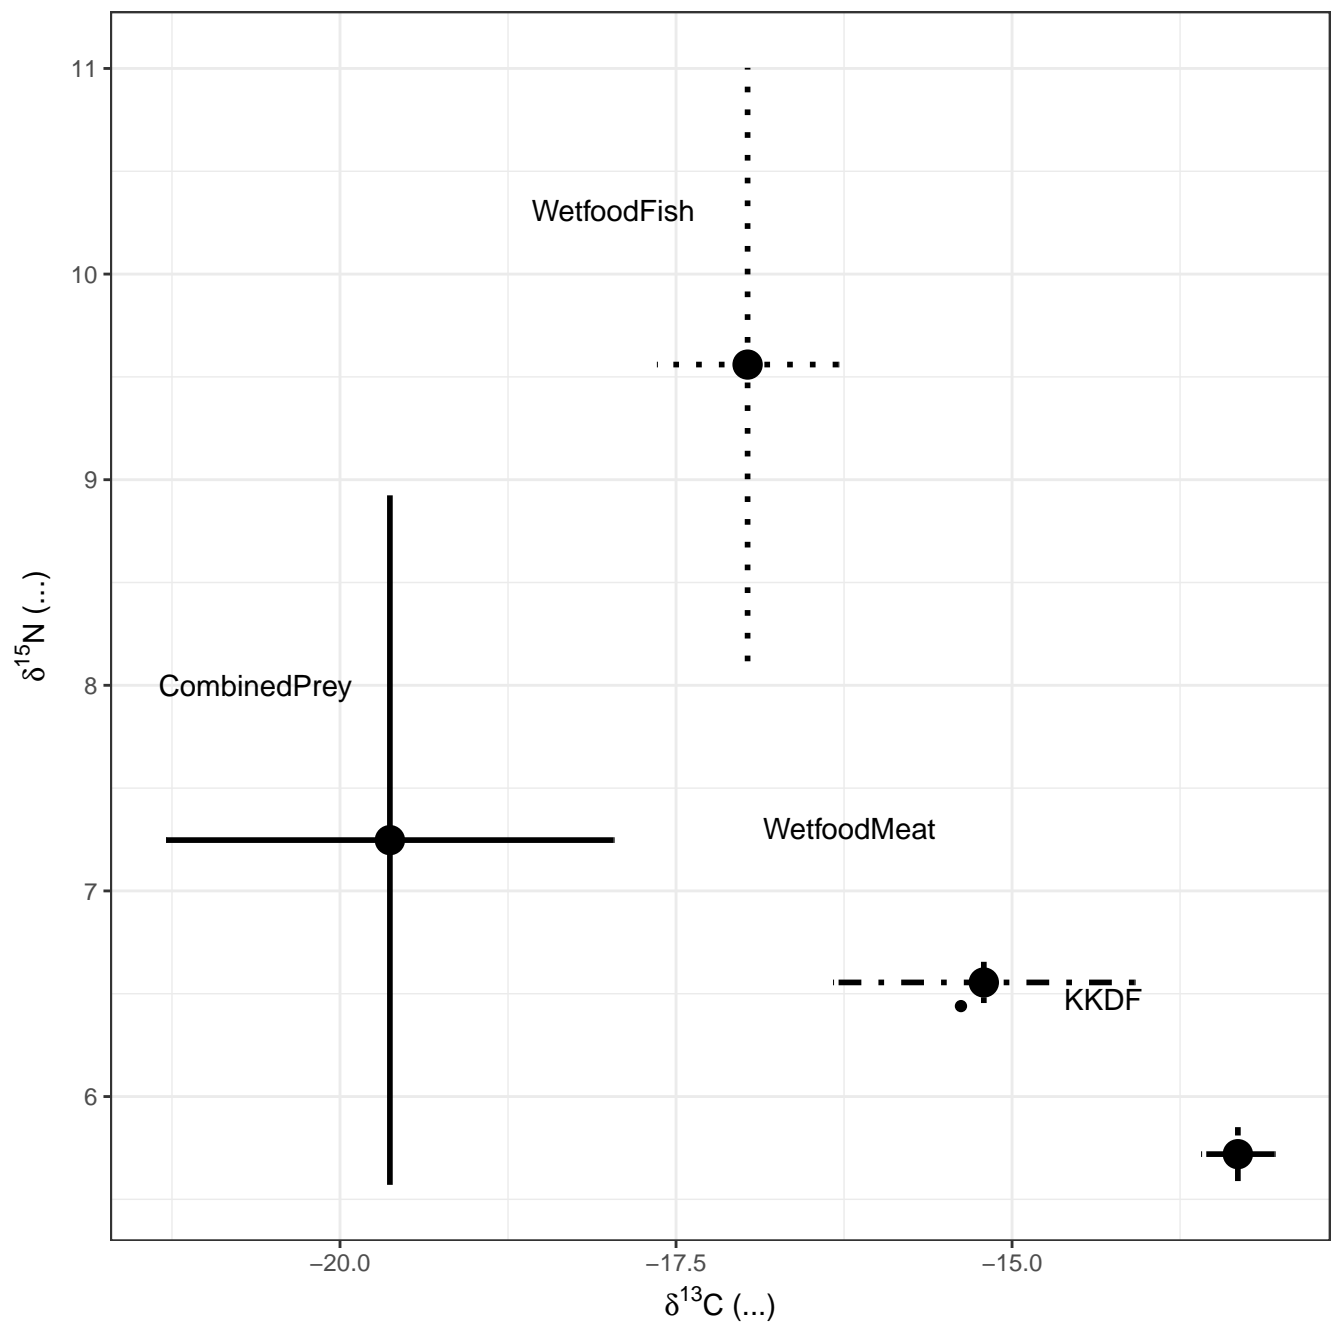

Supplement: Isospace_plots.zip [file Isospace_plots.zip]

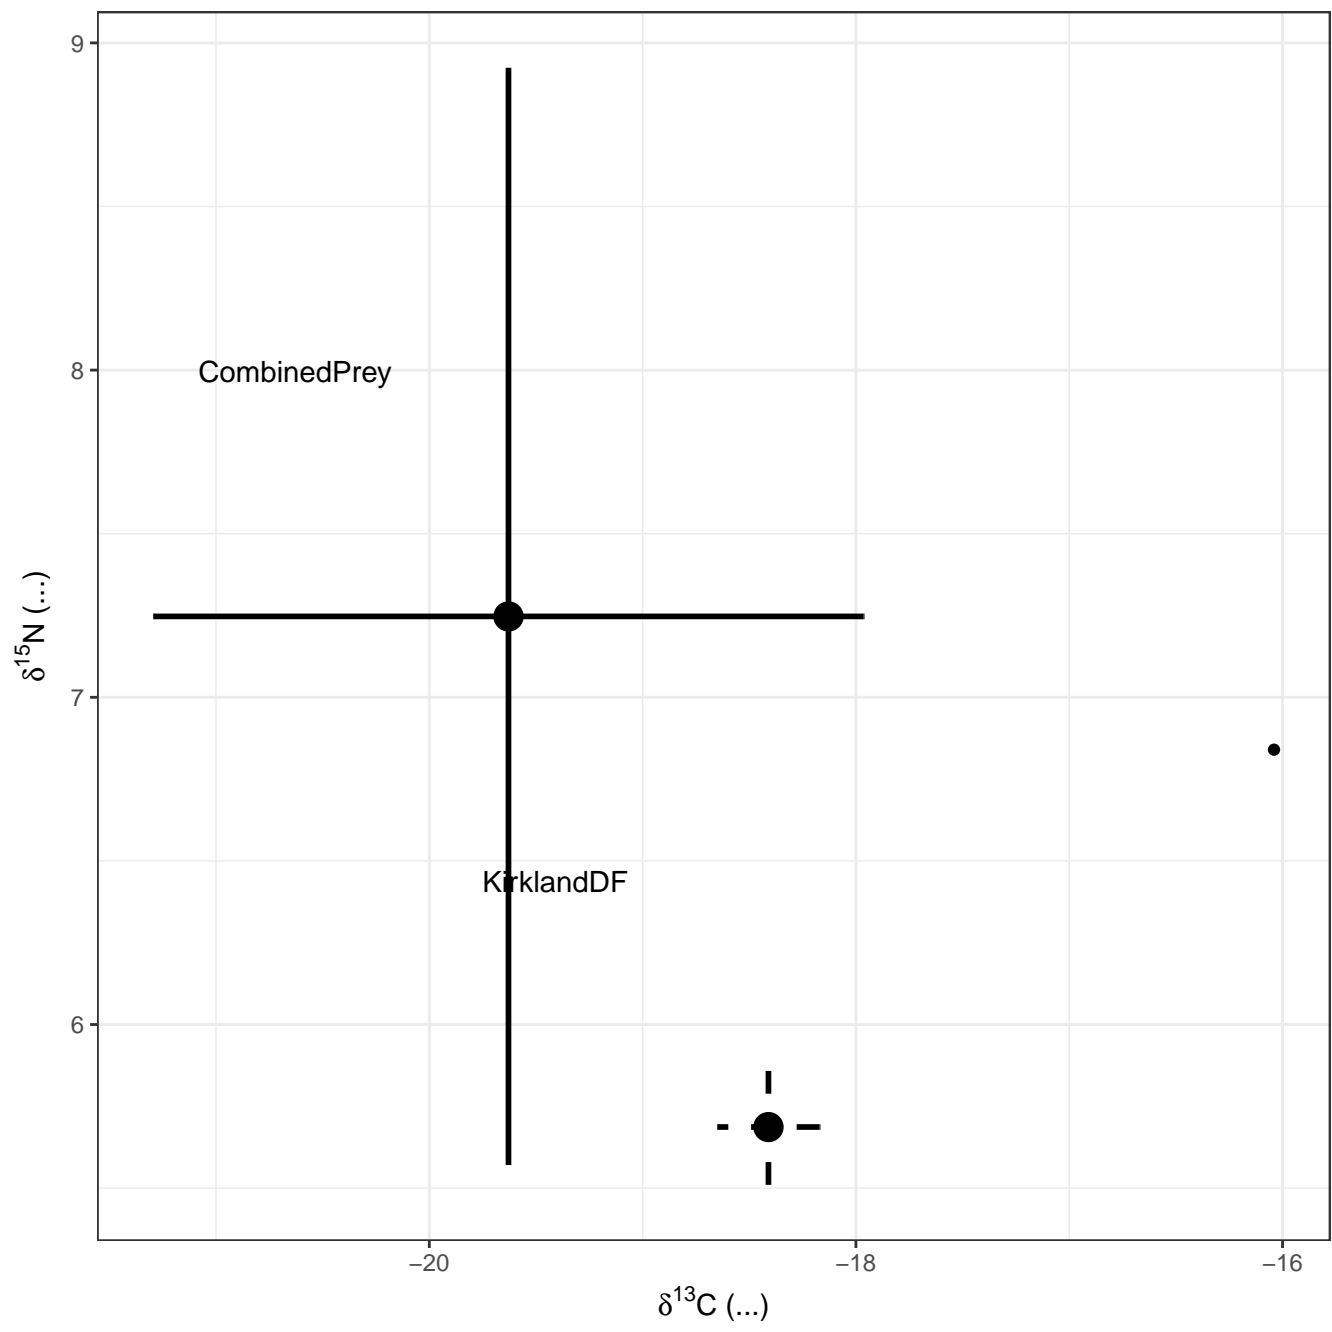

Supplement: Isospace_plots.zip [file Isospace_plots.zip]

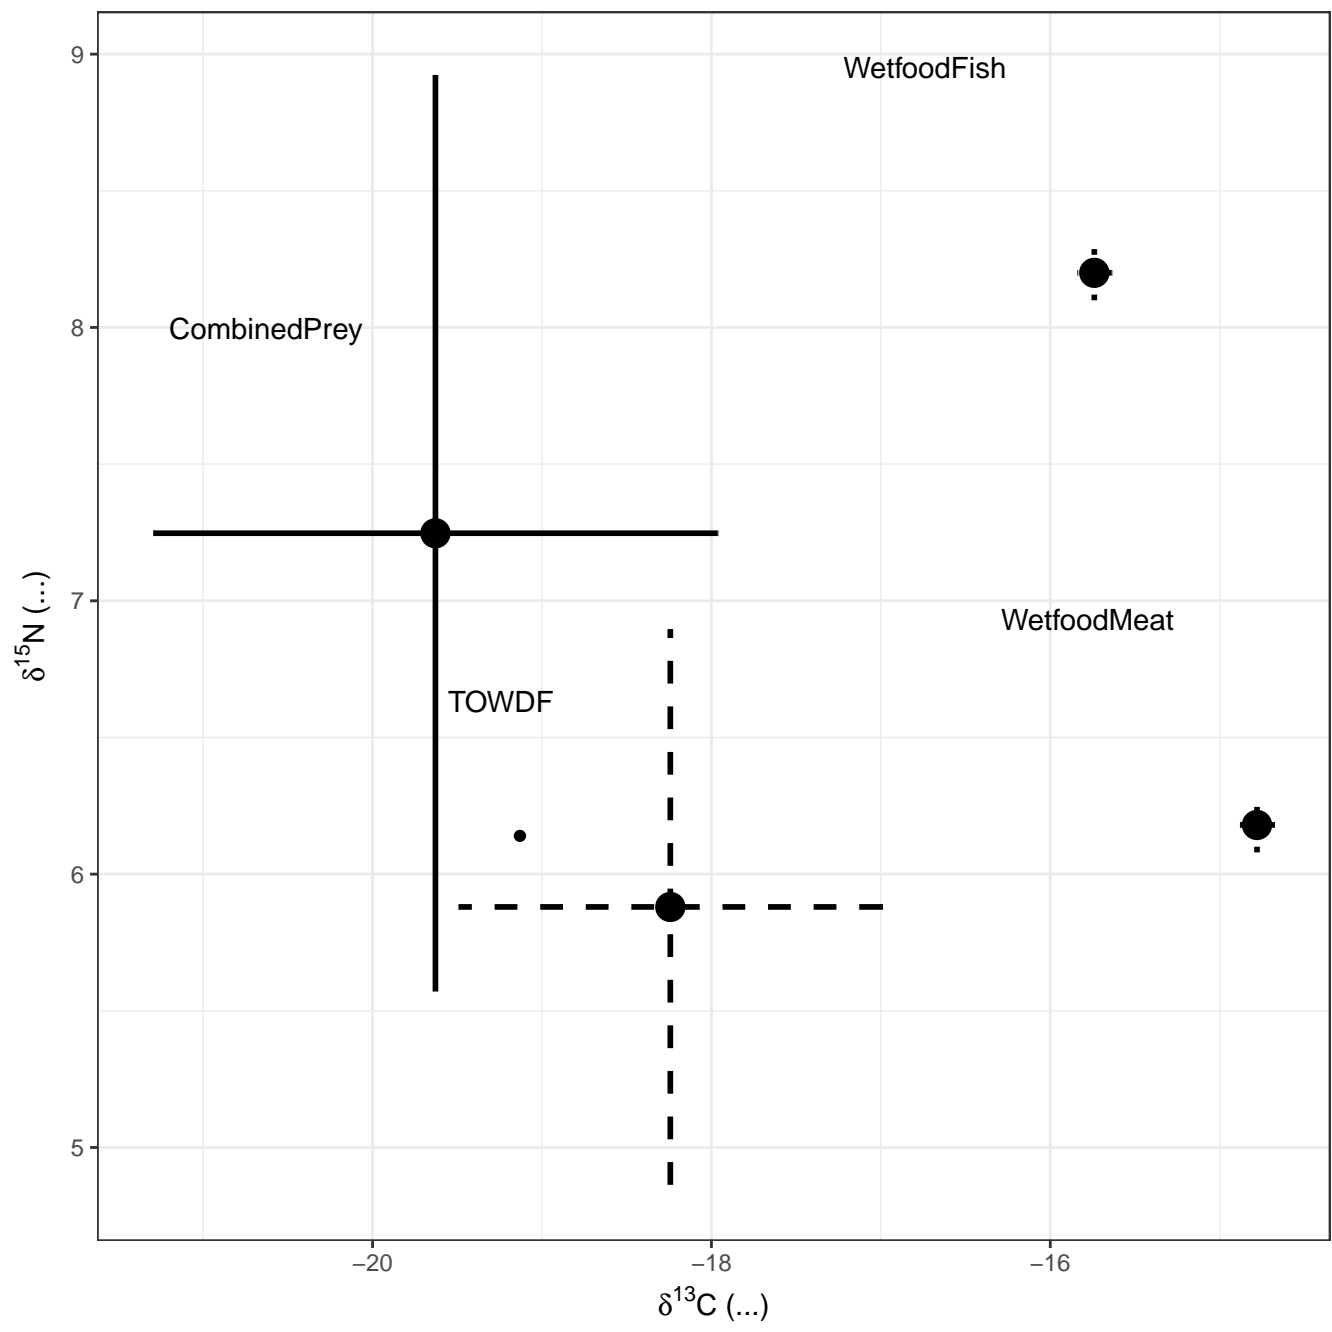

Supplement: Isospace_plots.zip [file Isospace_plots.zip]

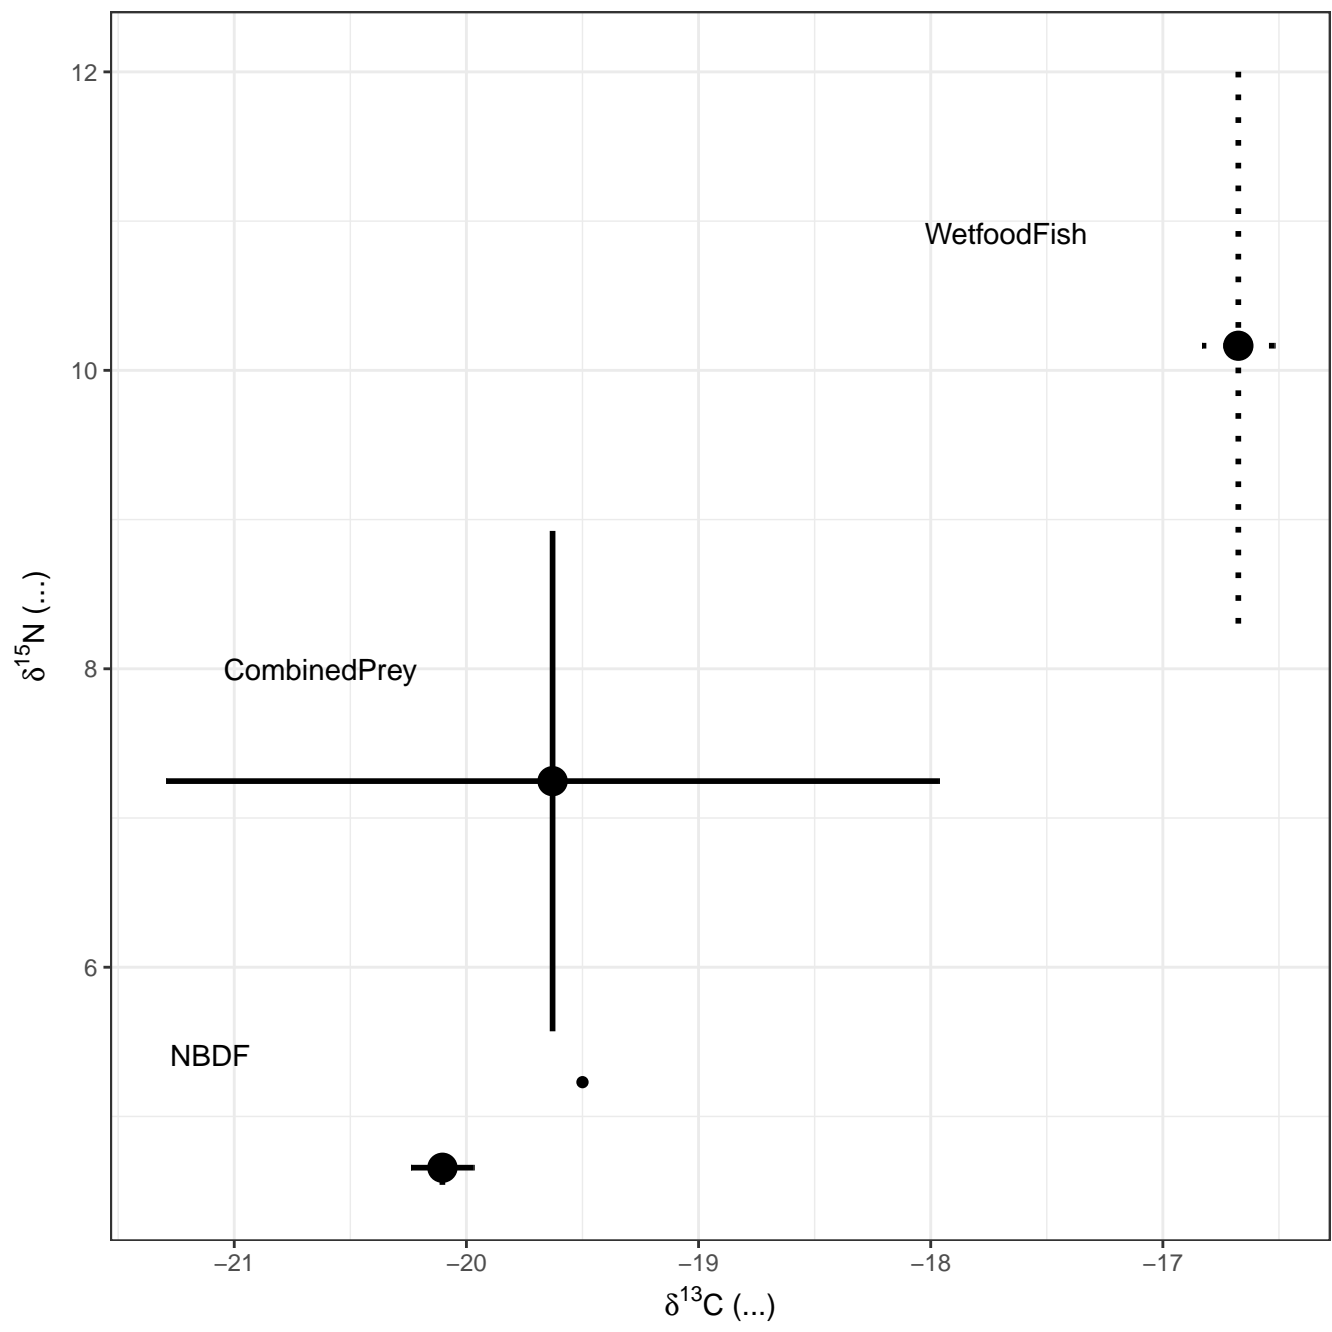

Supplement: Isospace_plots.zip [file Isospace_plots.zip]

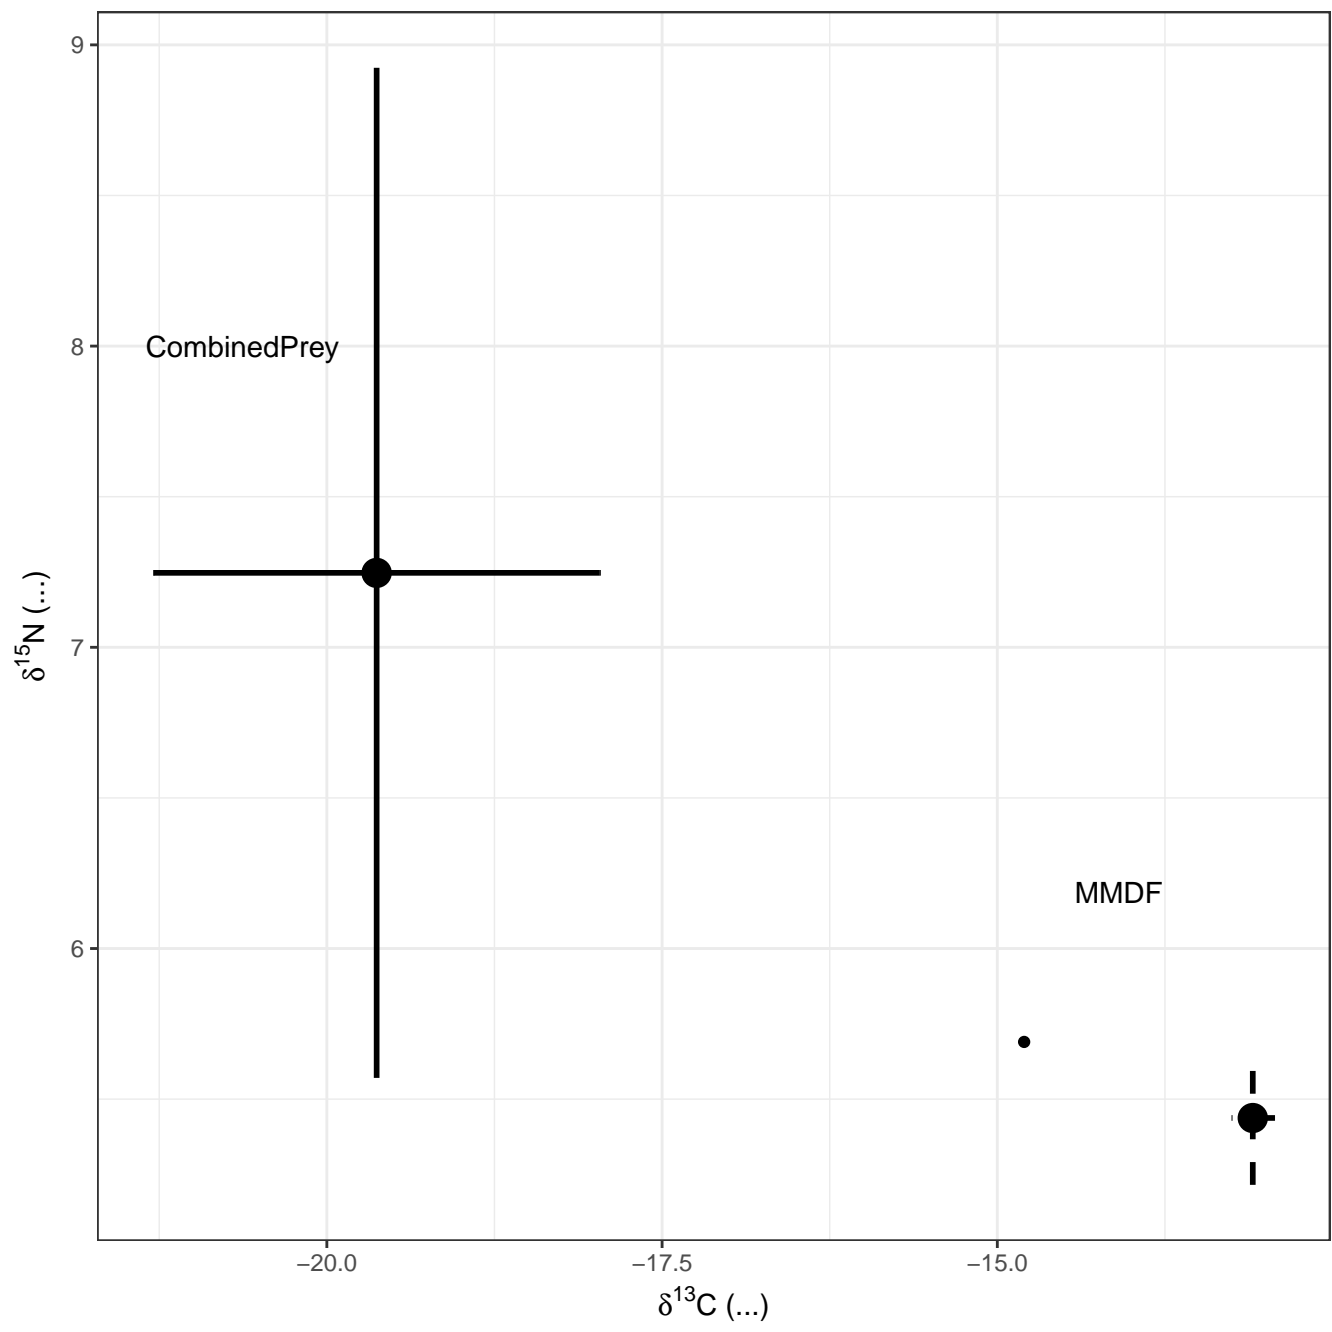

Supplement: Isospace_plots.zip [file Isospace_plots.zip]

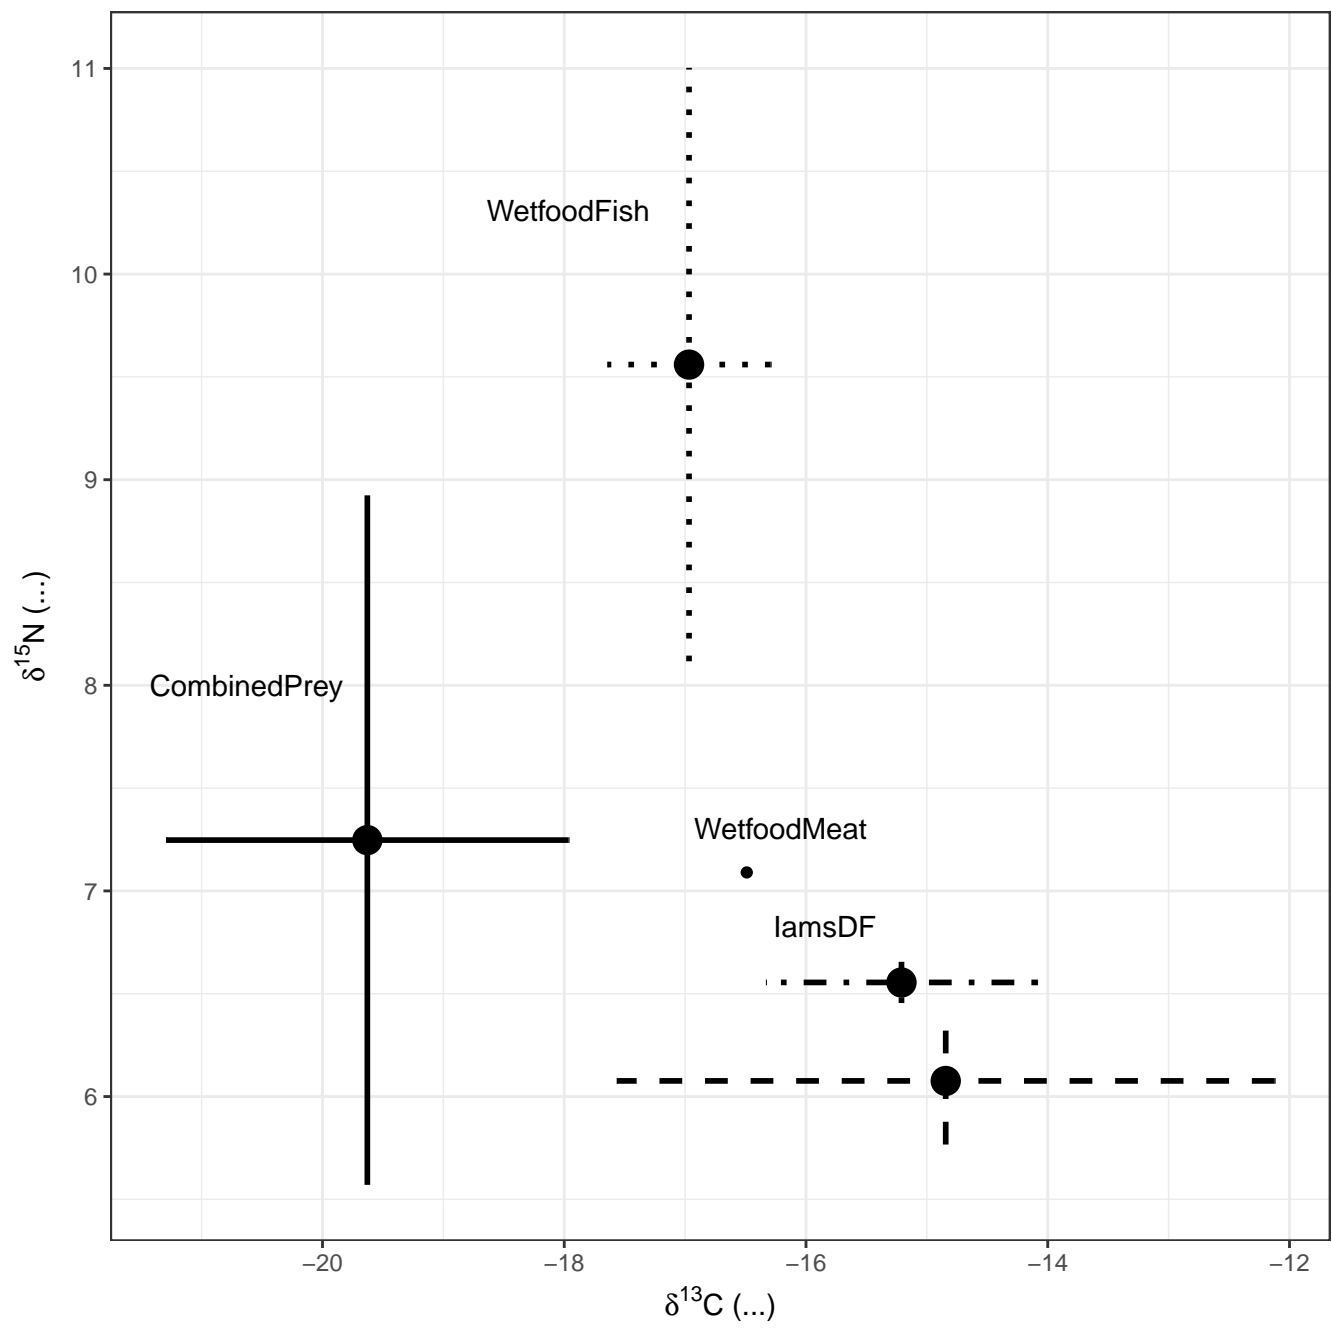

Supplement: Isospace_plots.zip [file Isospace_plots.zip]

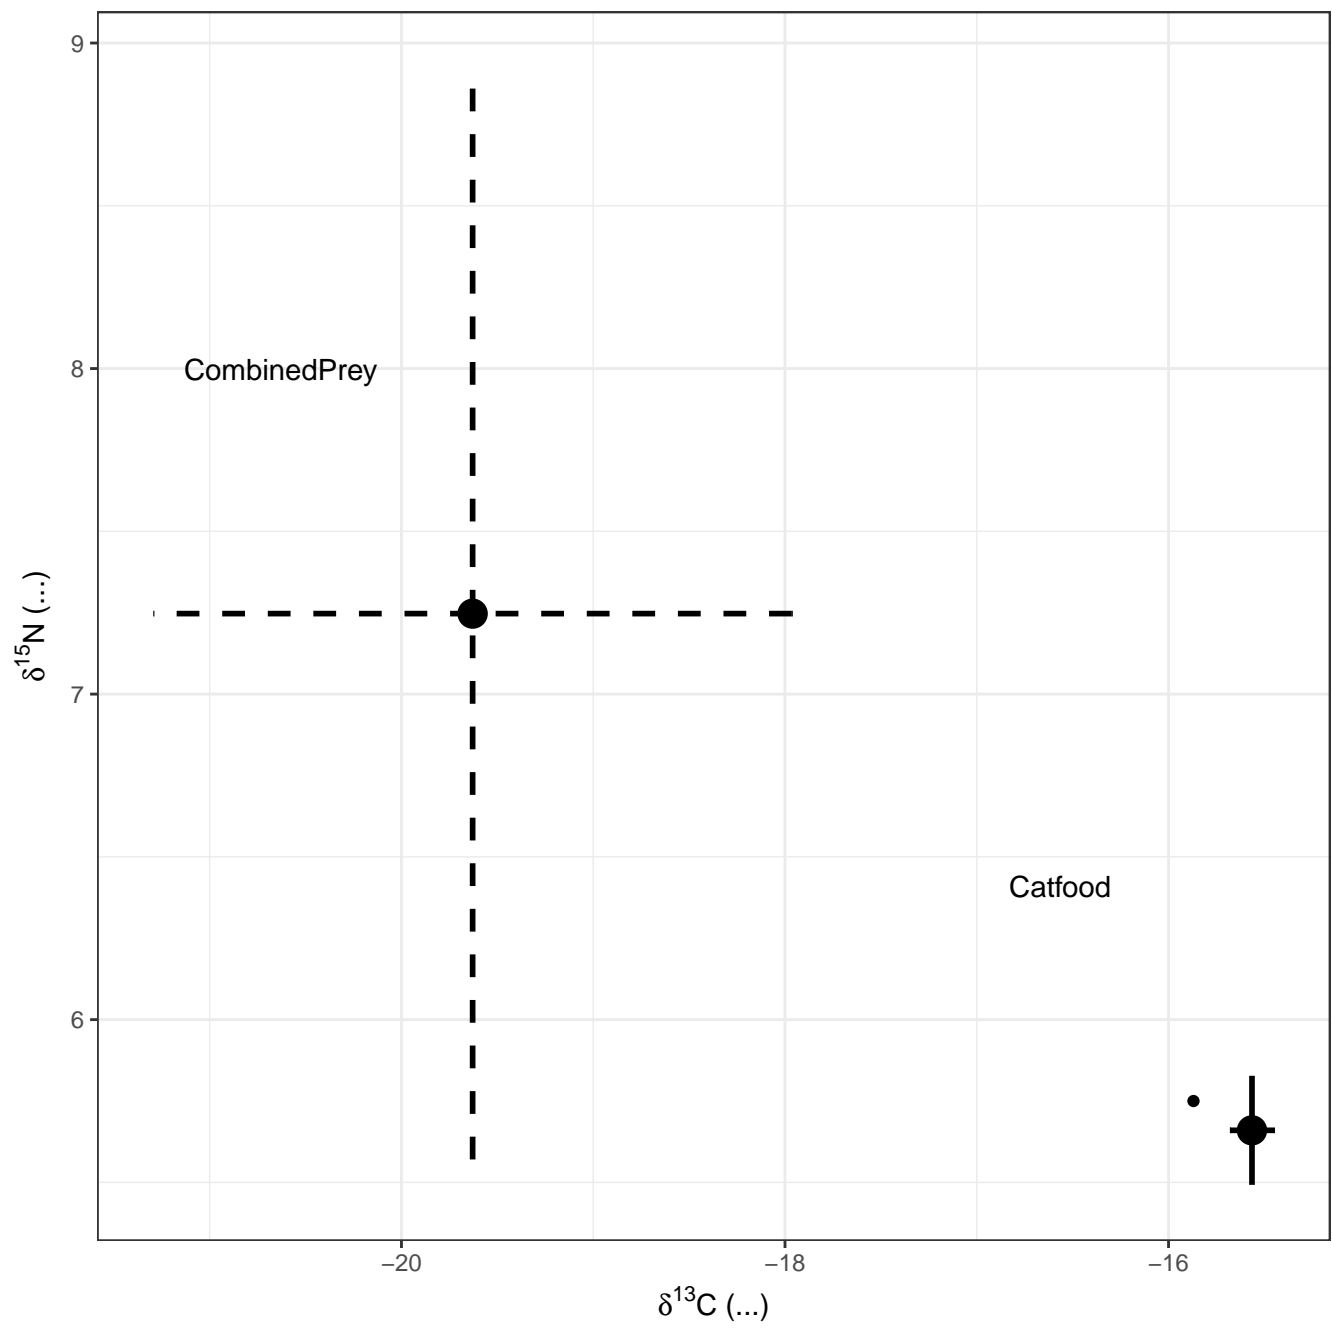

Supplement: Isospace_plots.zip [file Isospace_plots.zip]

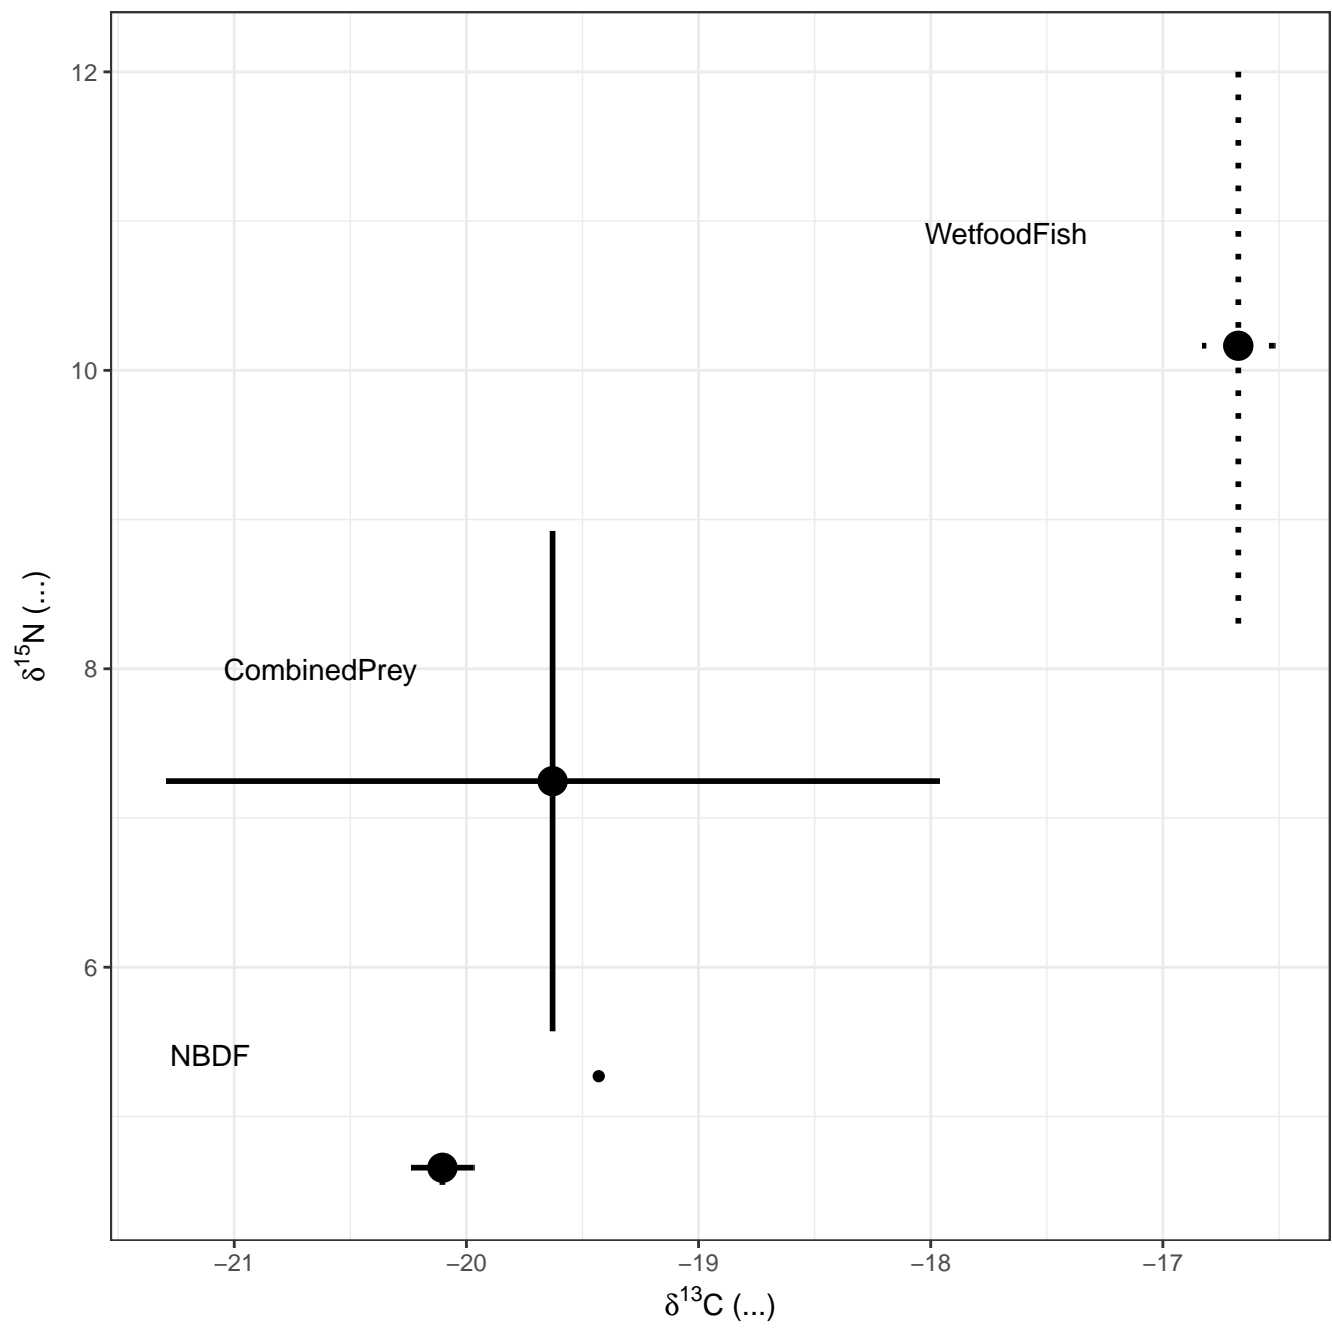

Supplement: Isospace_plots.zip [file Isospace_plots.zip]

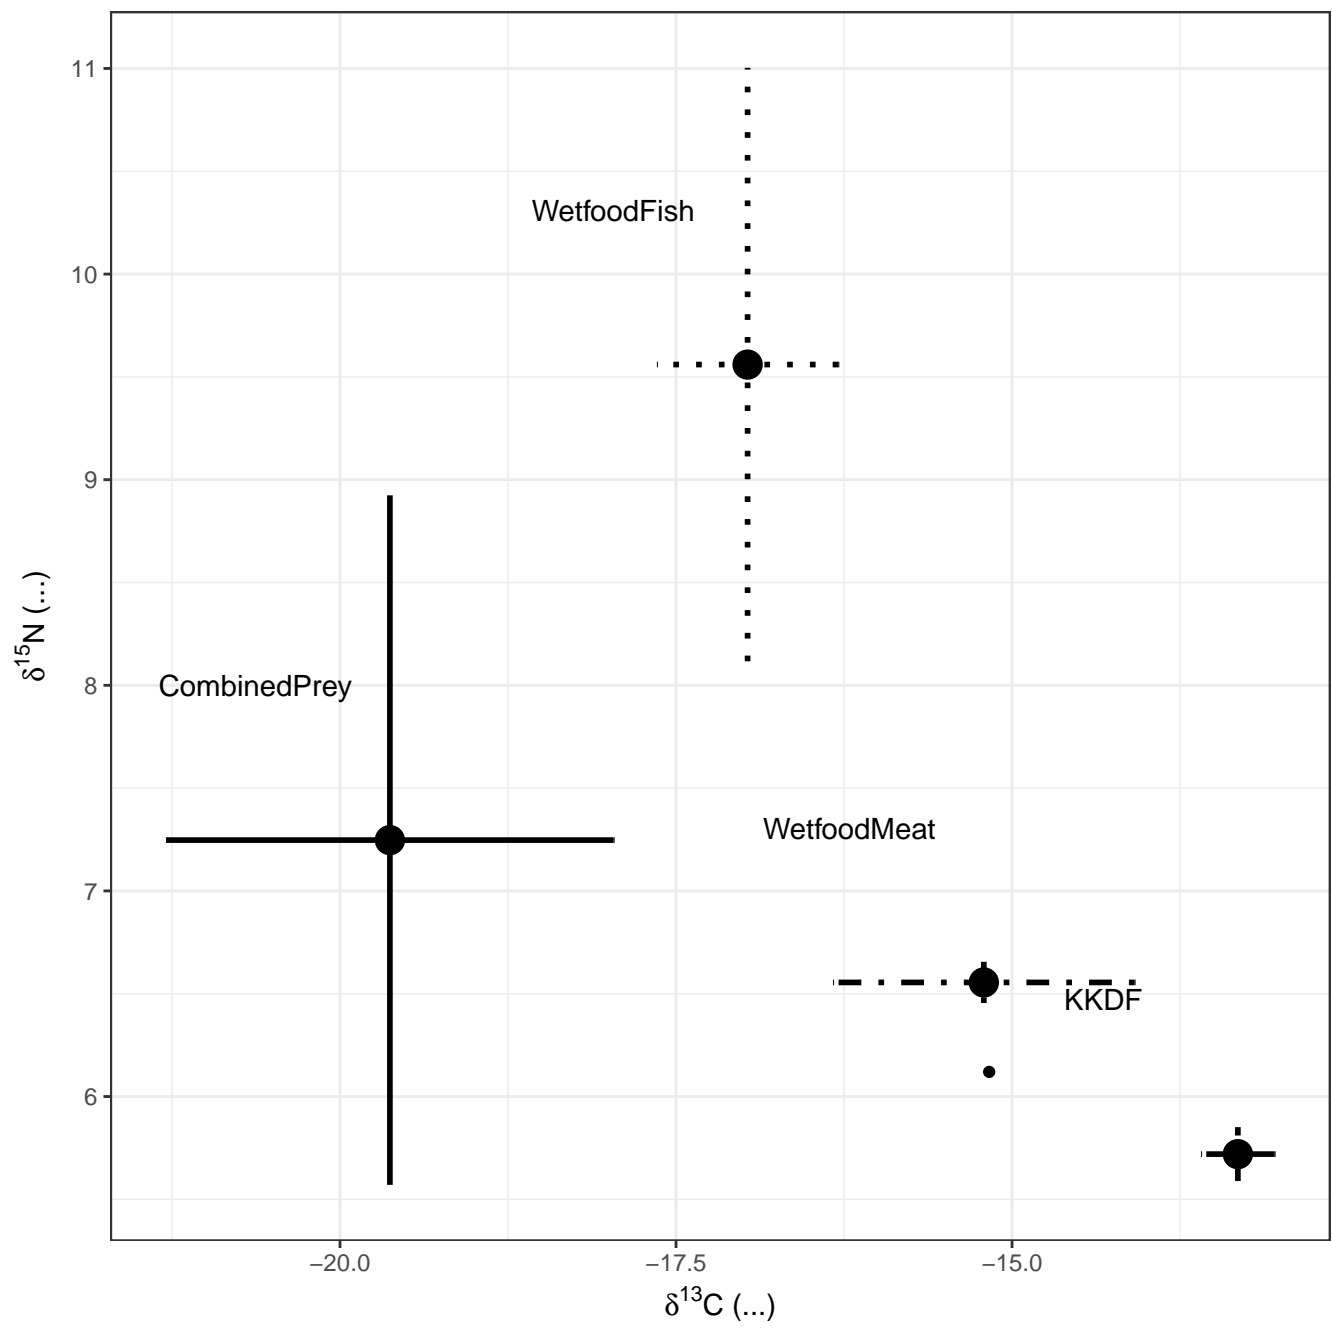

Supplement: Isospace_plots.zip [file Isospace_plots.zip]

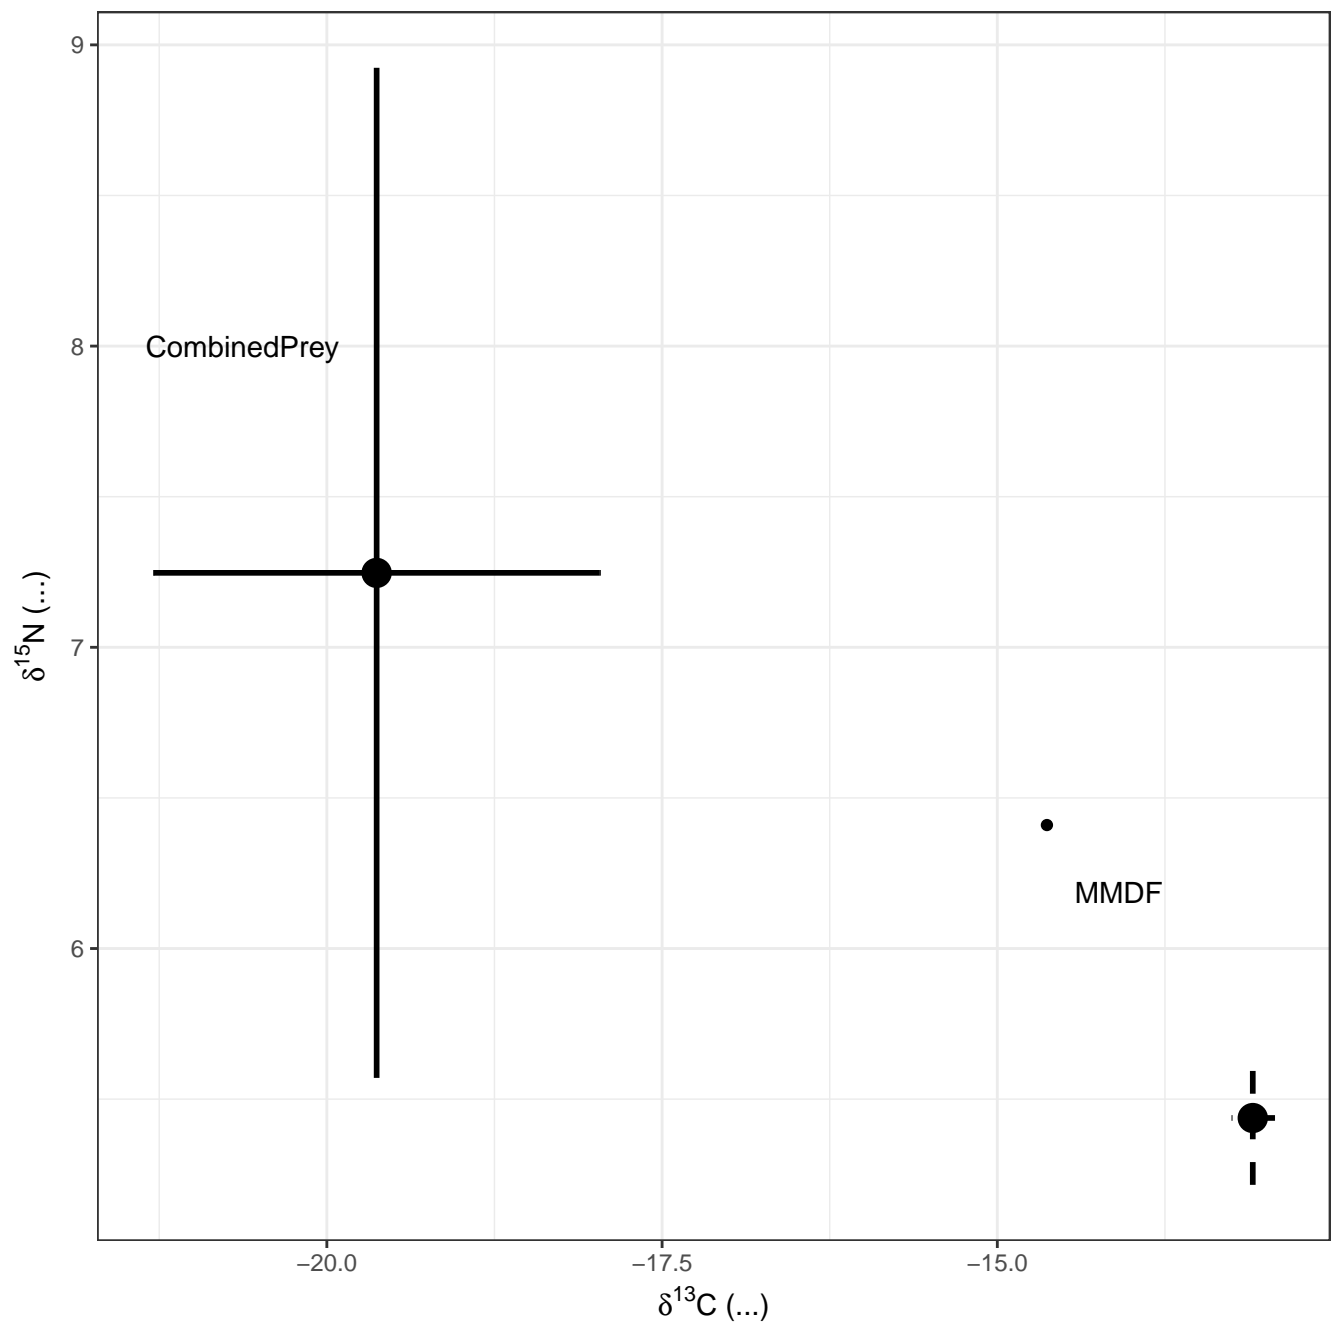

Supplement: Isospace_plots.zip [file Isospace_plots.zip]

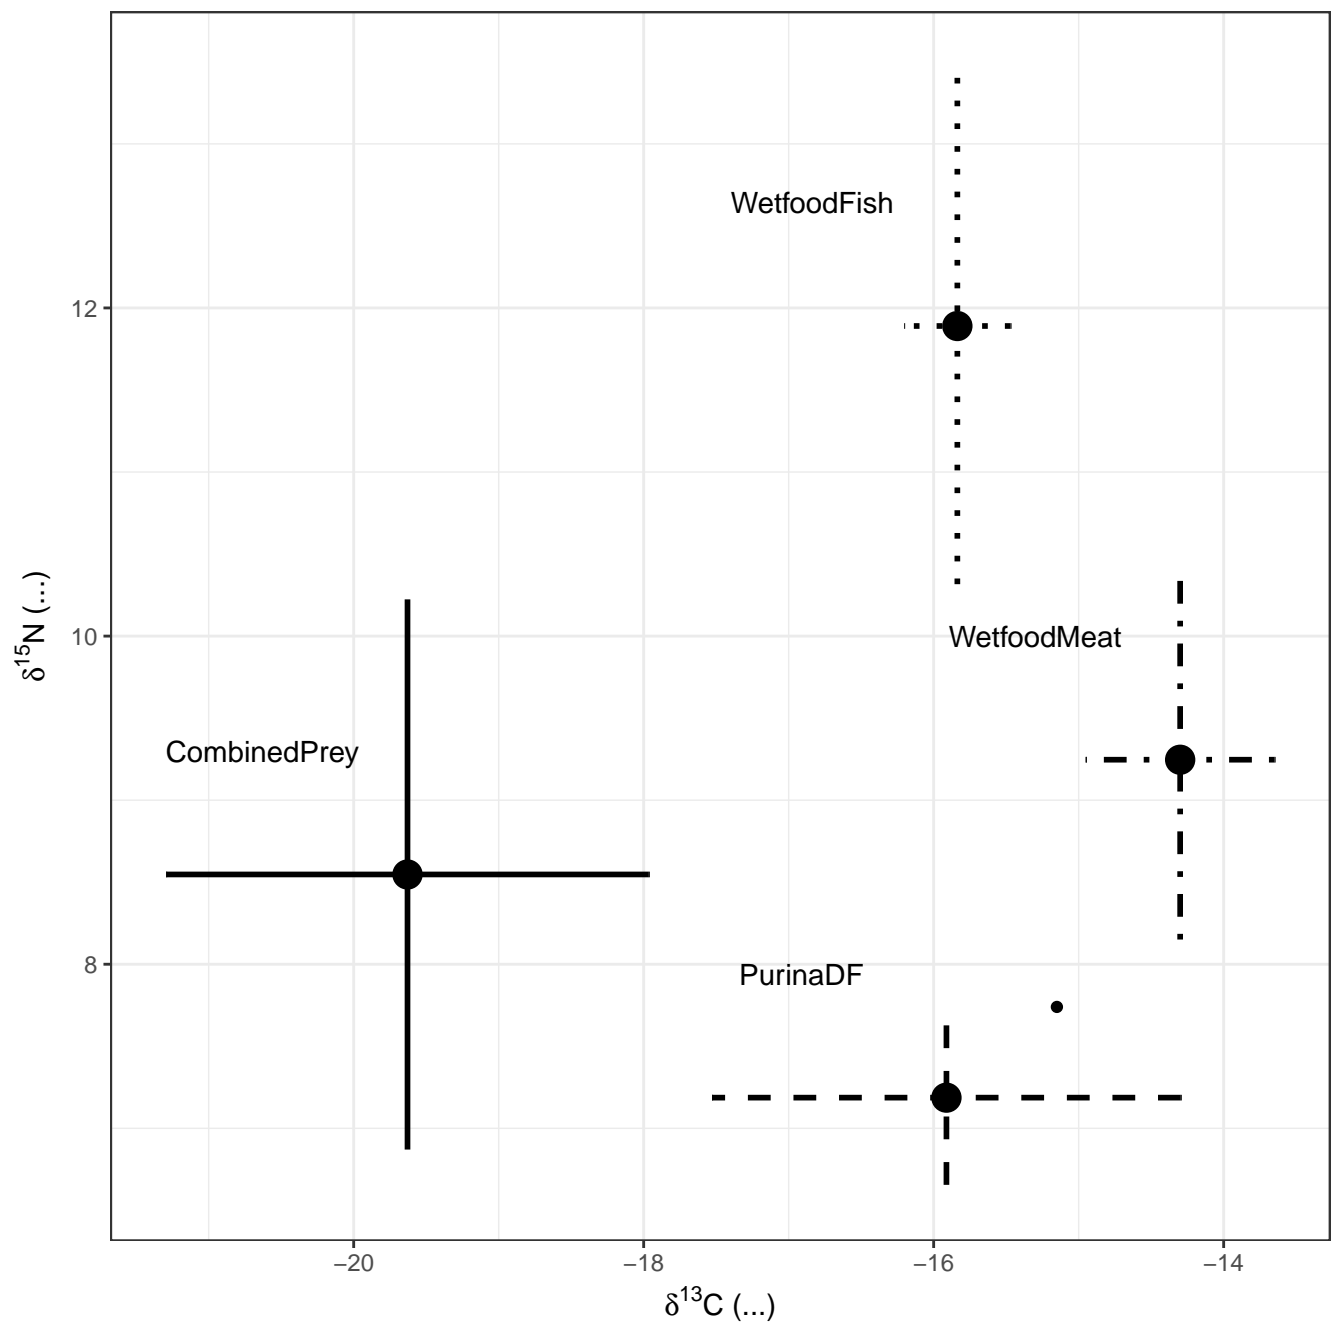

Supplement: Isospace_plots.zip [file Isospace_plots.zip]

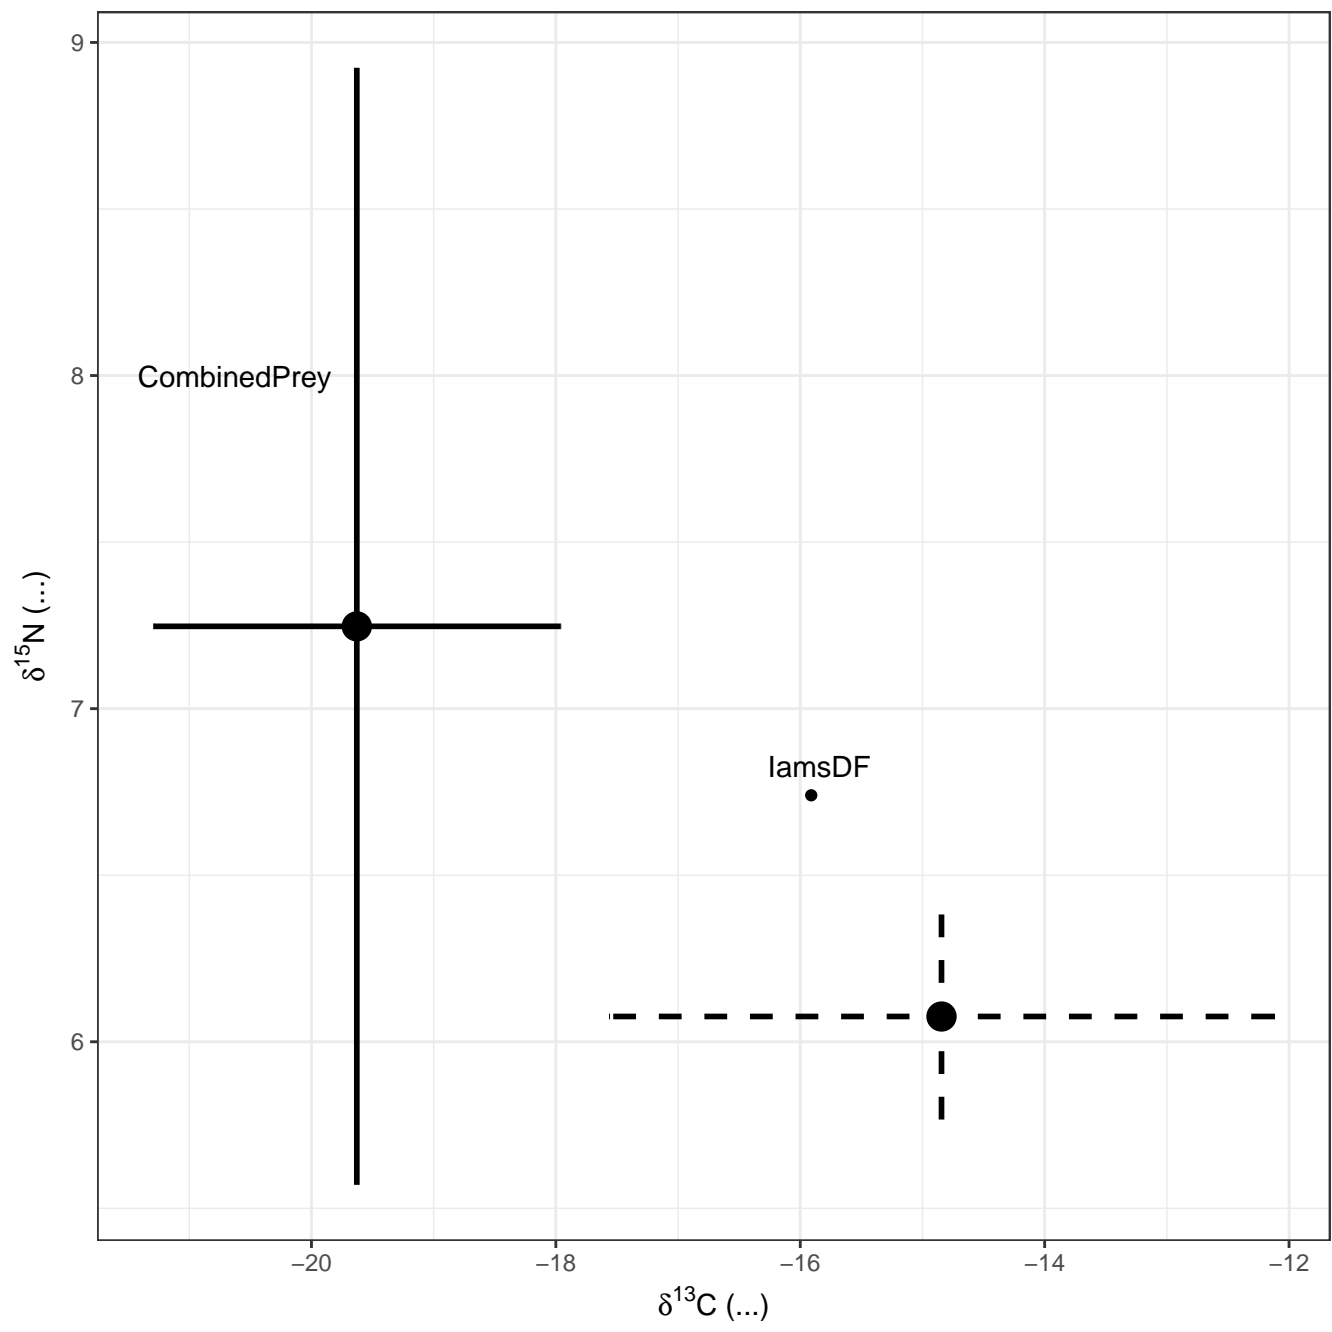

Supplement: Isospace_plots.zip [file Isospace_plots.zip]

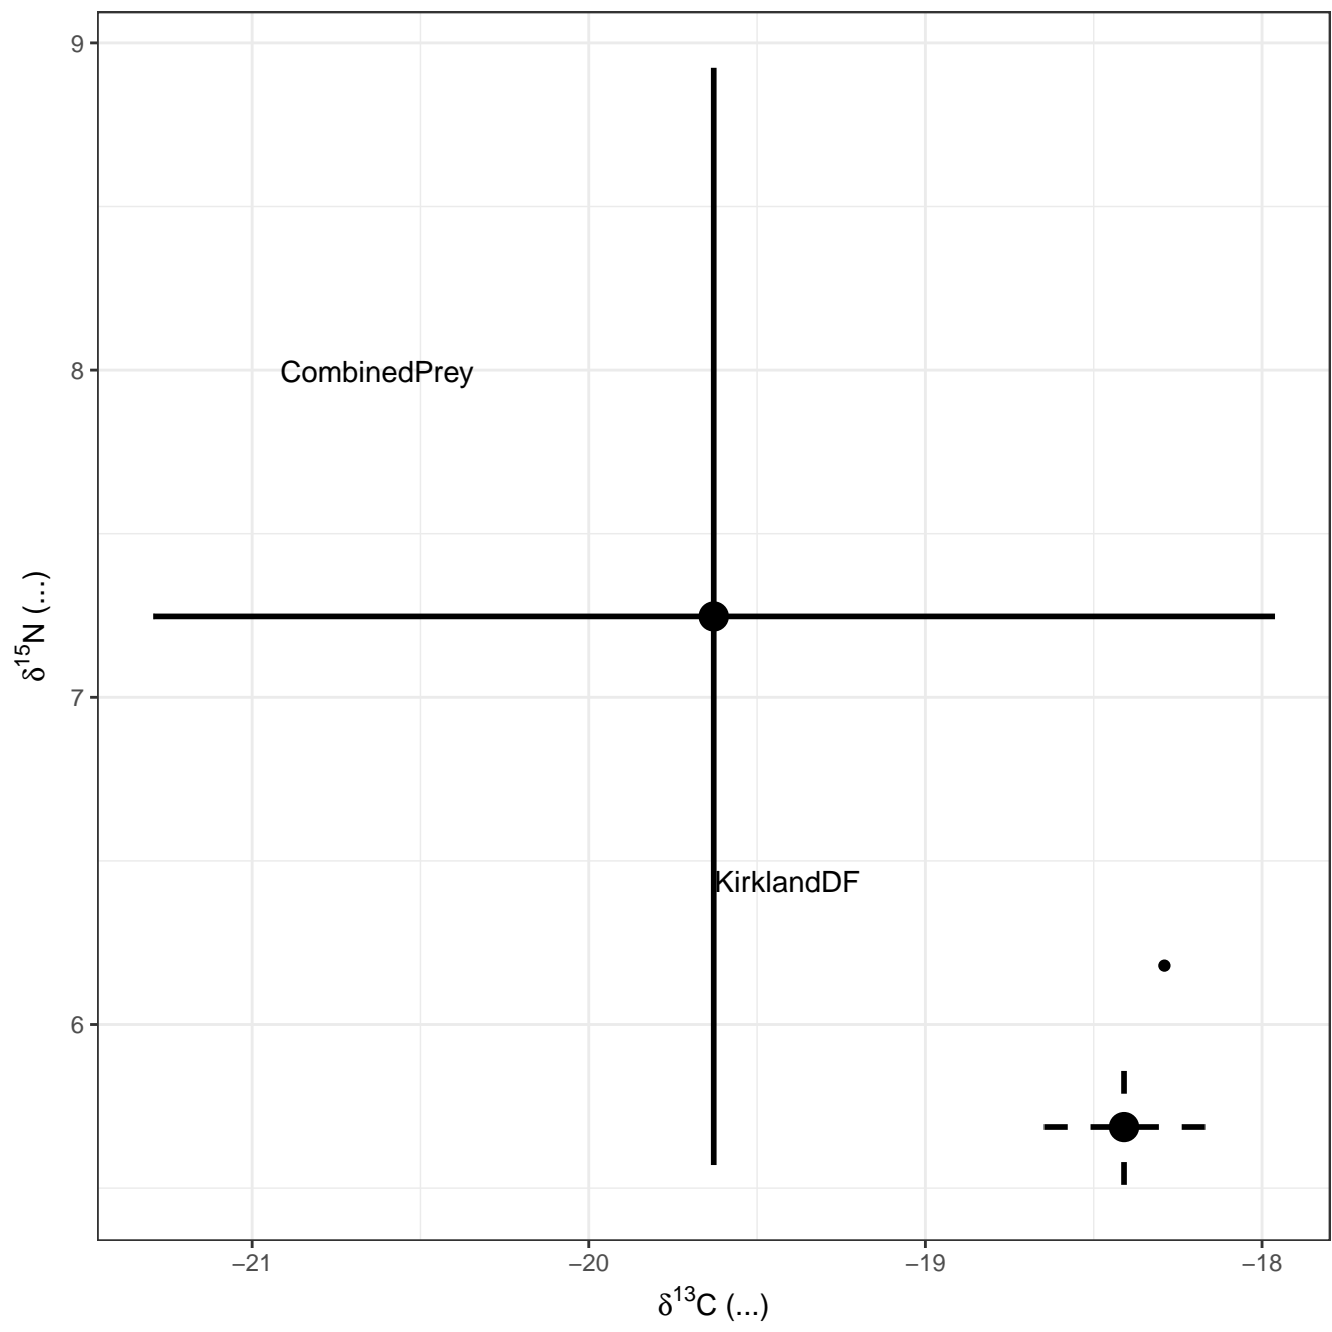

Supplement: Isospace_plots.zip [file Isospace_plots.zip]

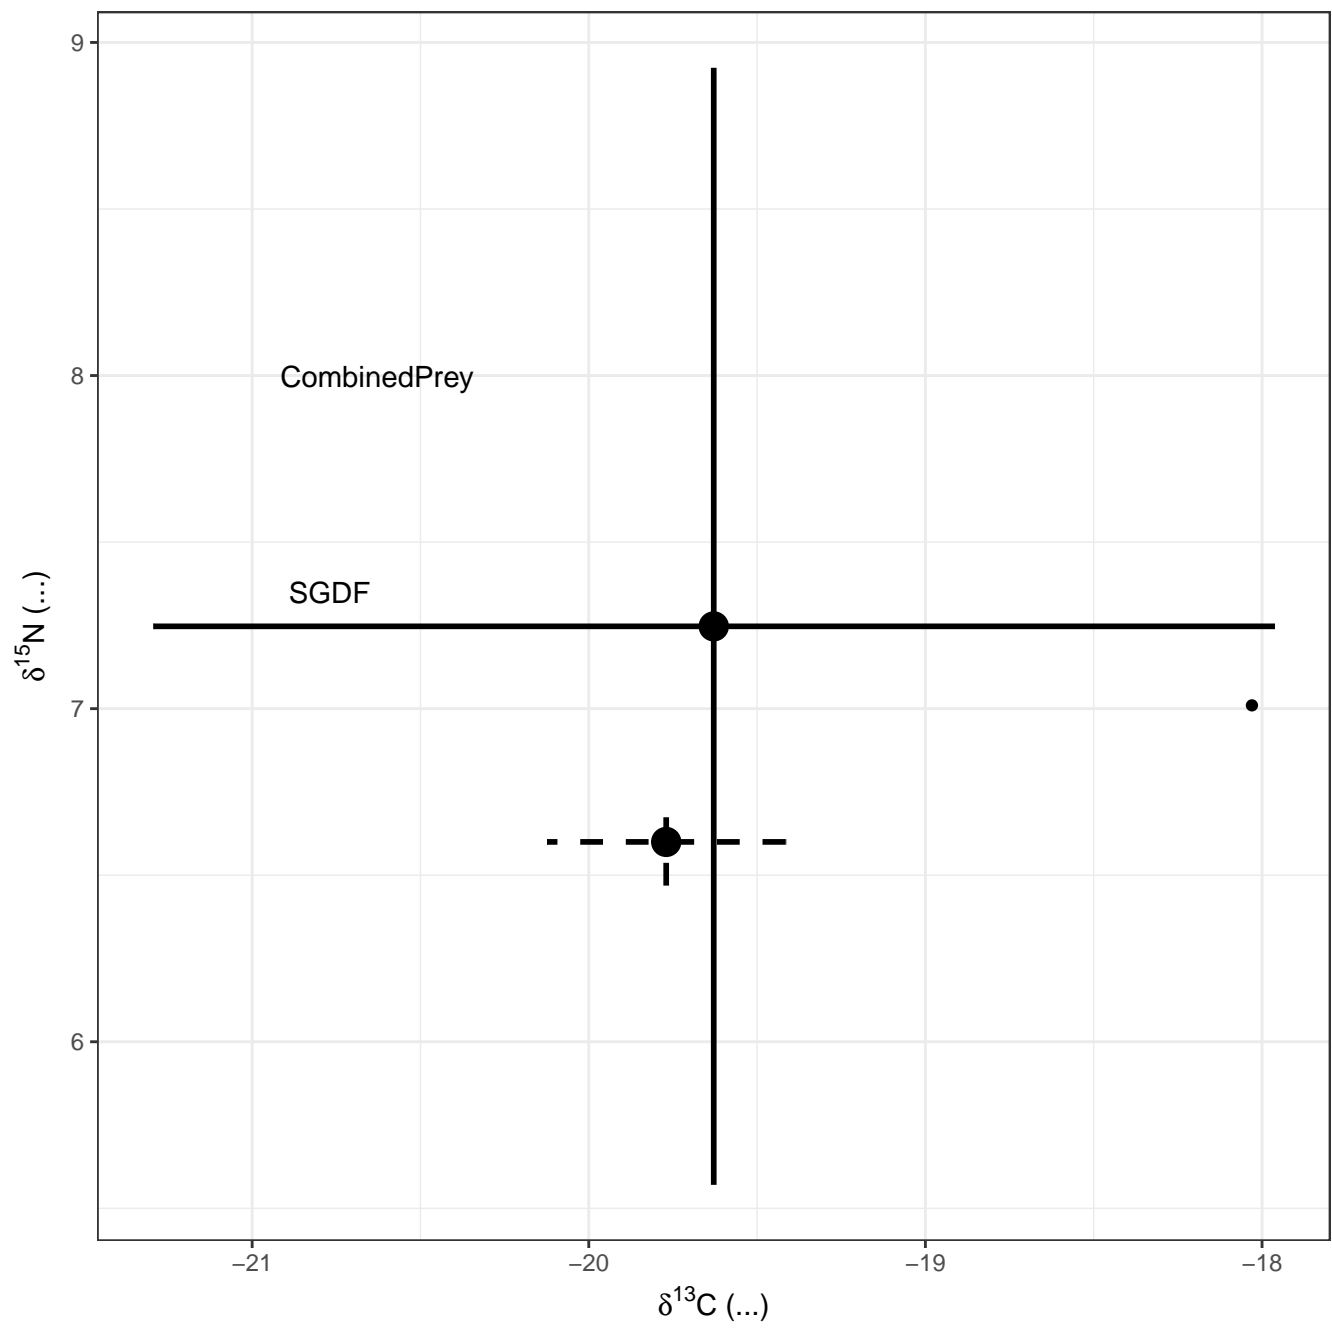

Supplement: Isospace_plots.zip [file Isospace_plots.zip]

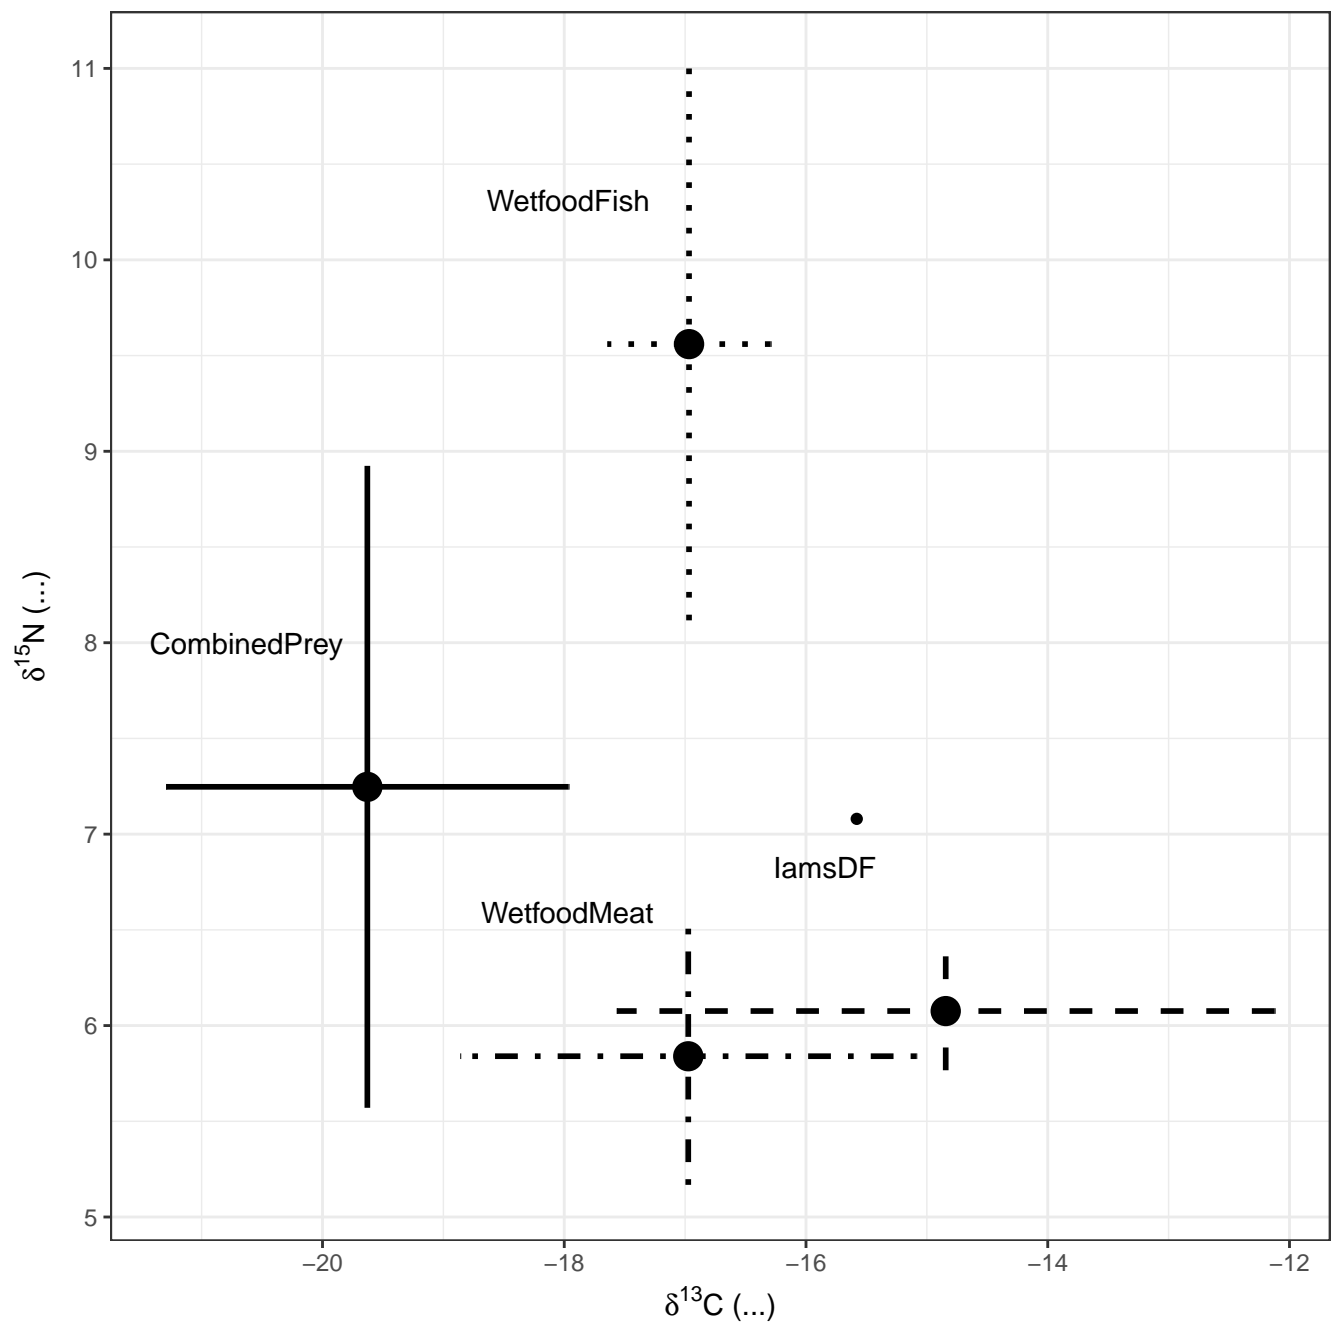

Supplement: Isospace_plots.zip [file Isospace_plots.zip]

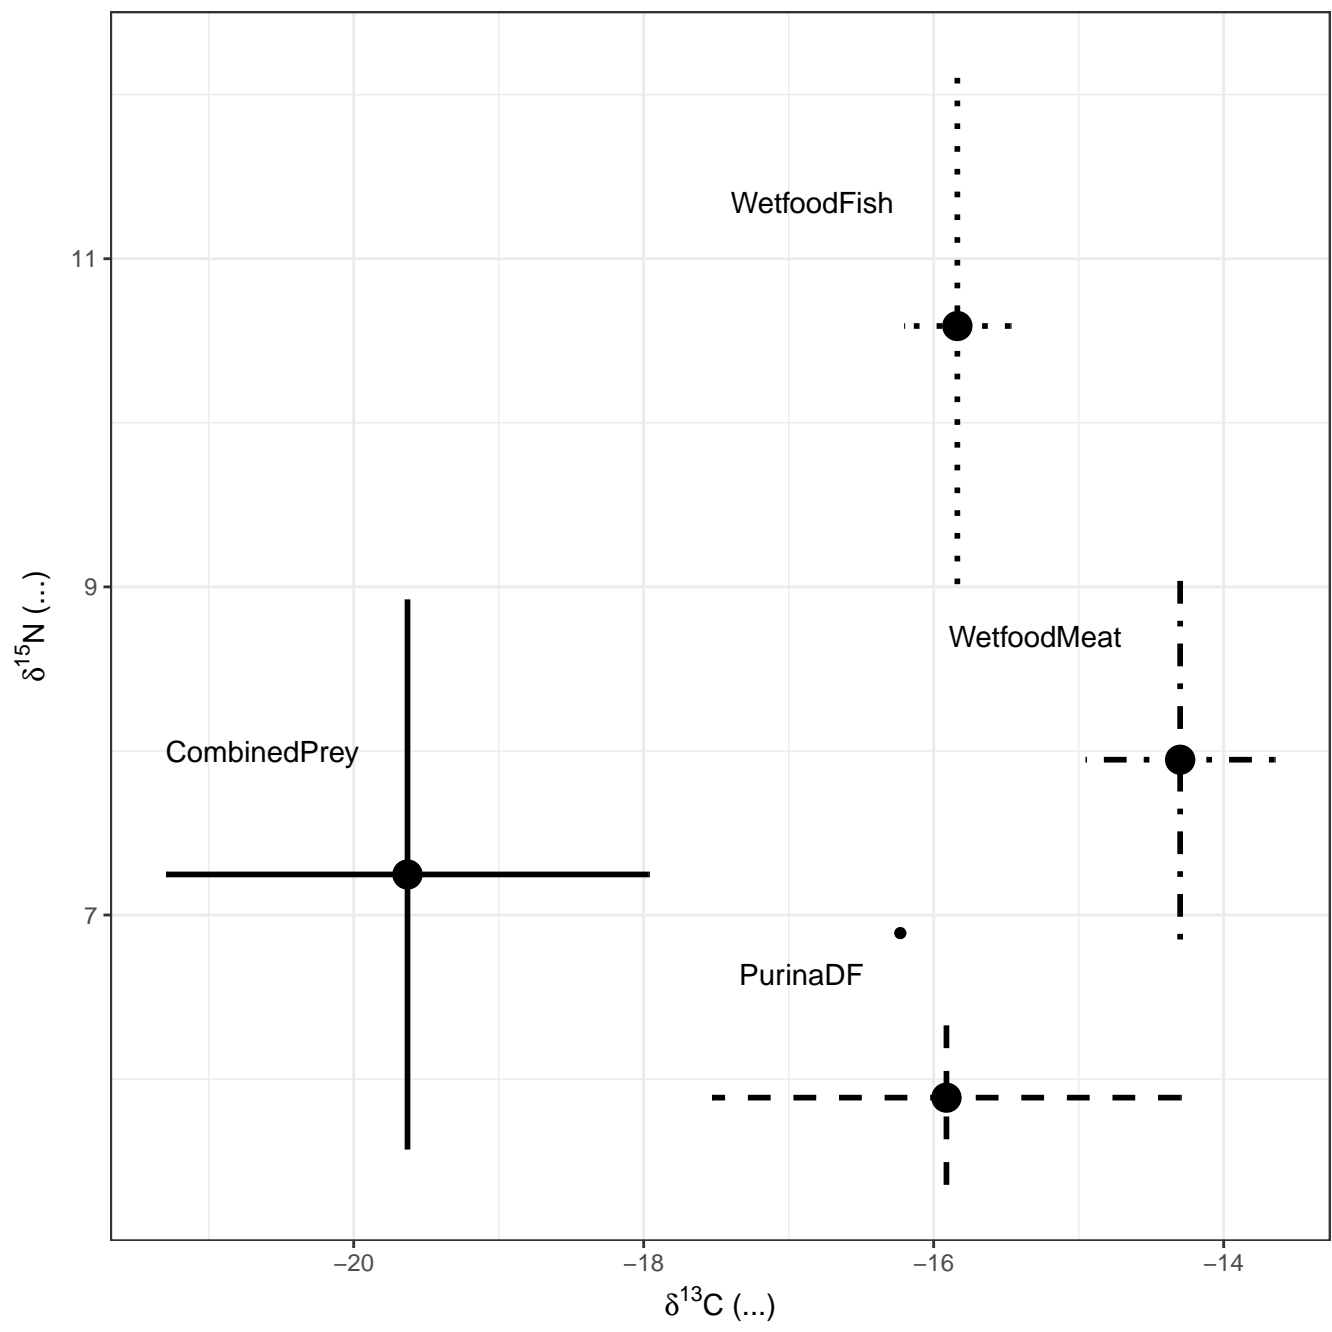

Supplement: Isospace_plots.zip [file Isospace_plots.zip]

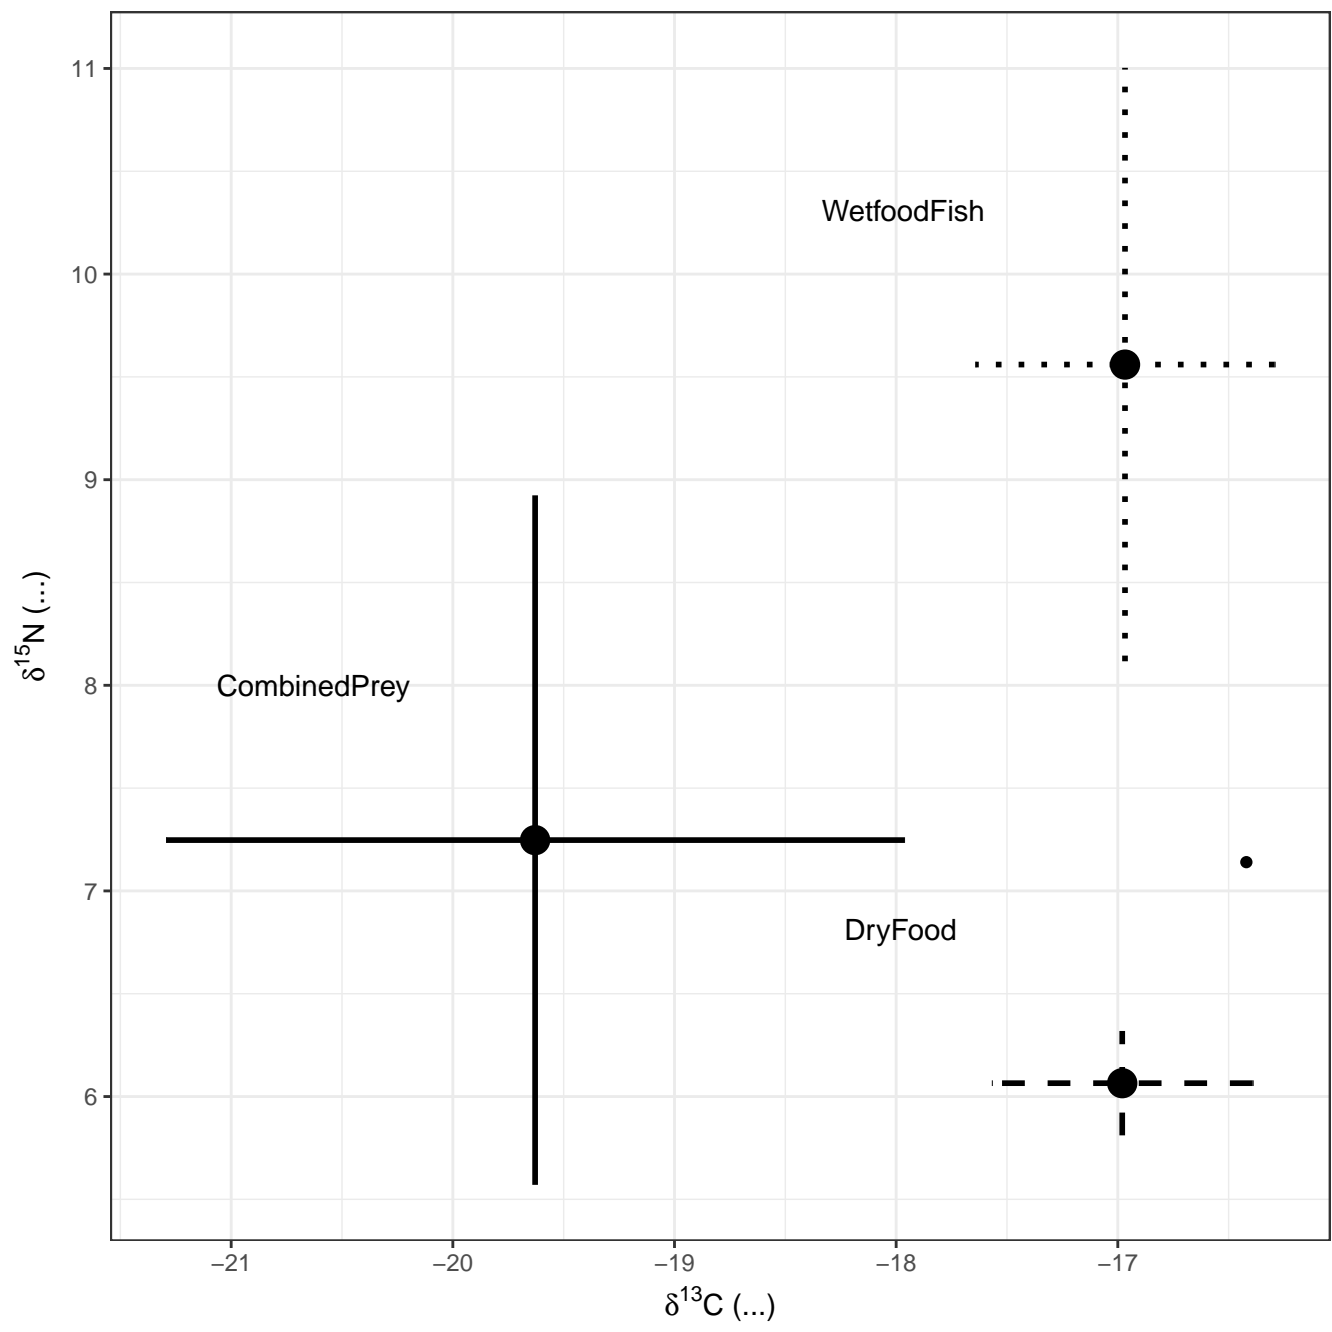

Supplement: Isospace_plots.zip [file Isospace_plots.zip]

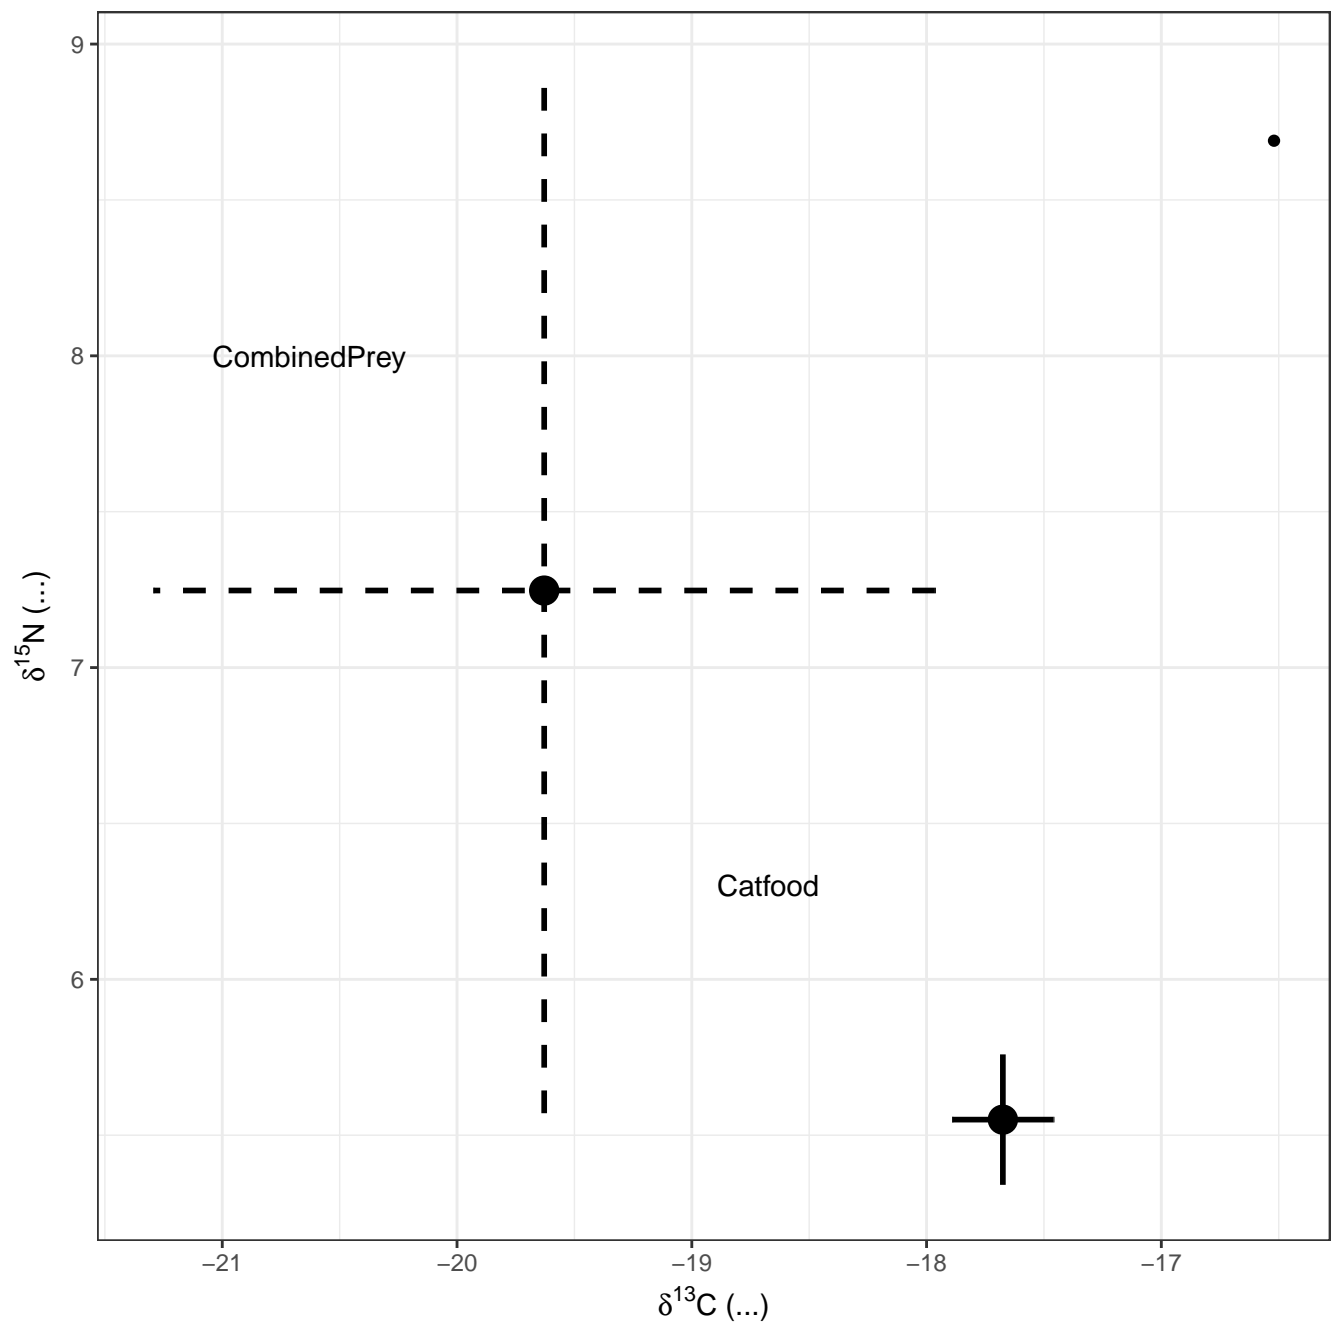

Supplement: Isospace_plots.zip [file Isospace_plots.zip]

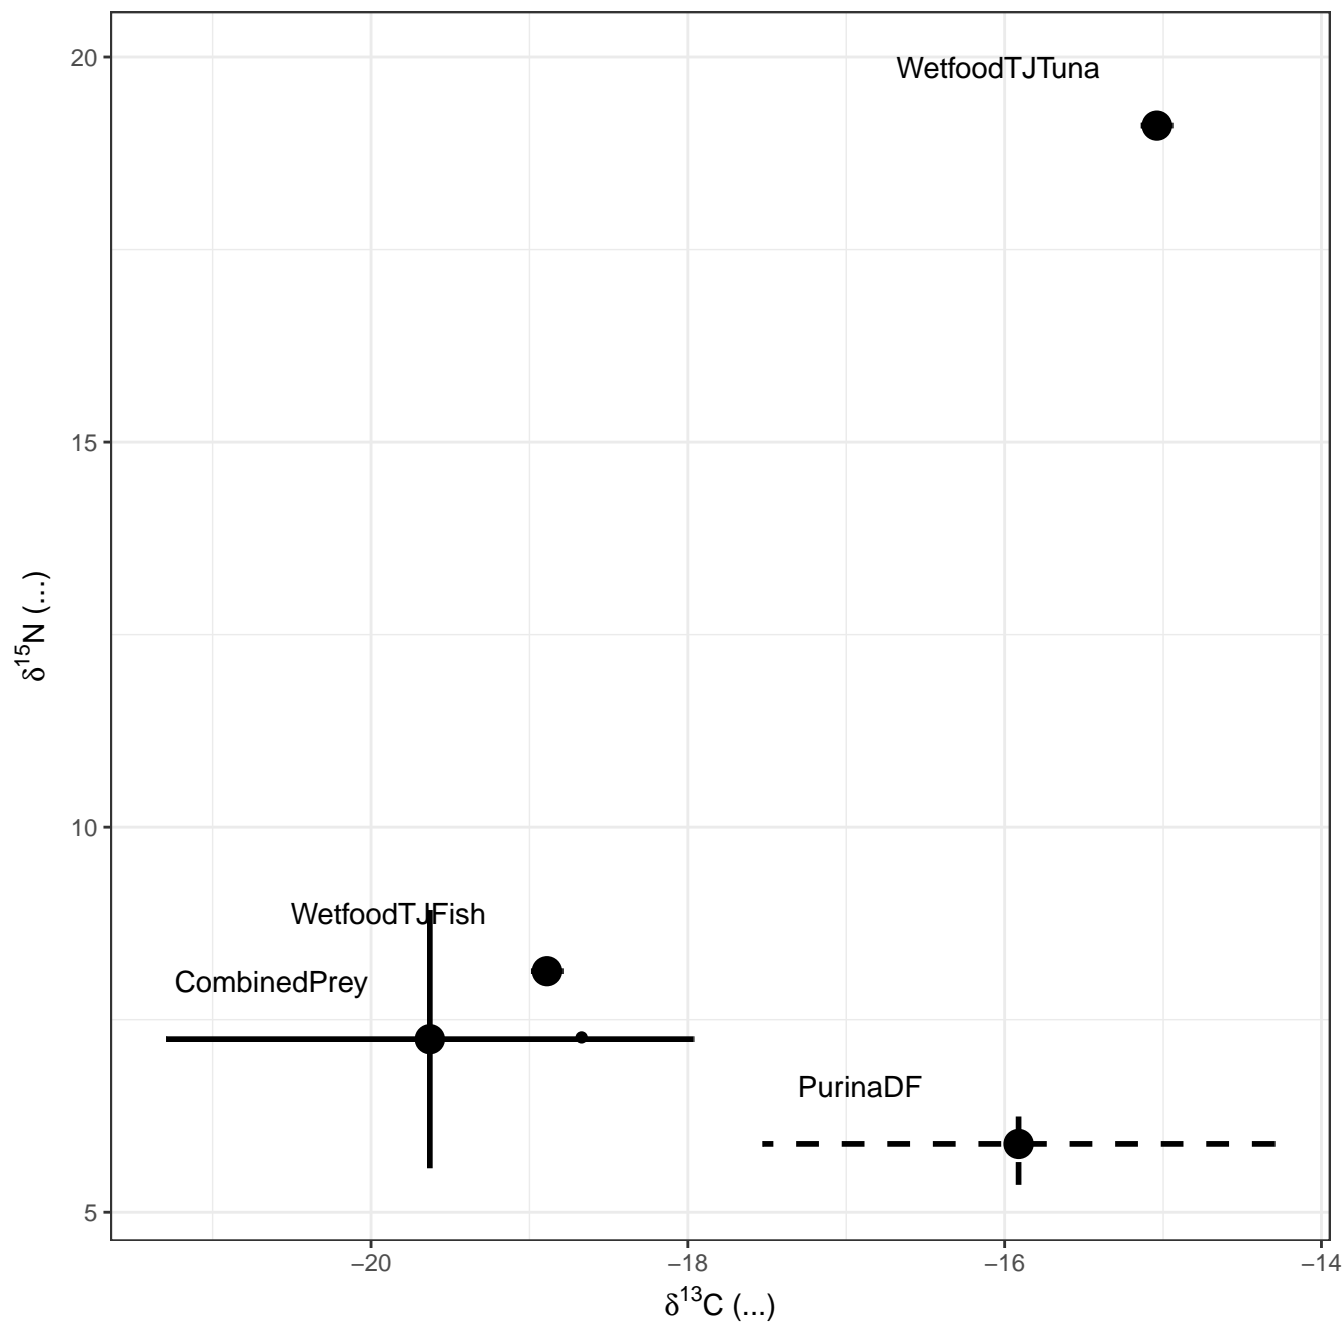

Supplement: Isospace_plots.zip [file Isospace_plots.zip]

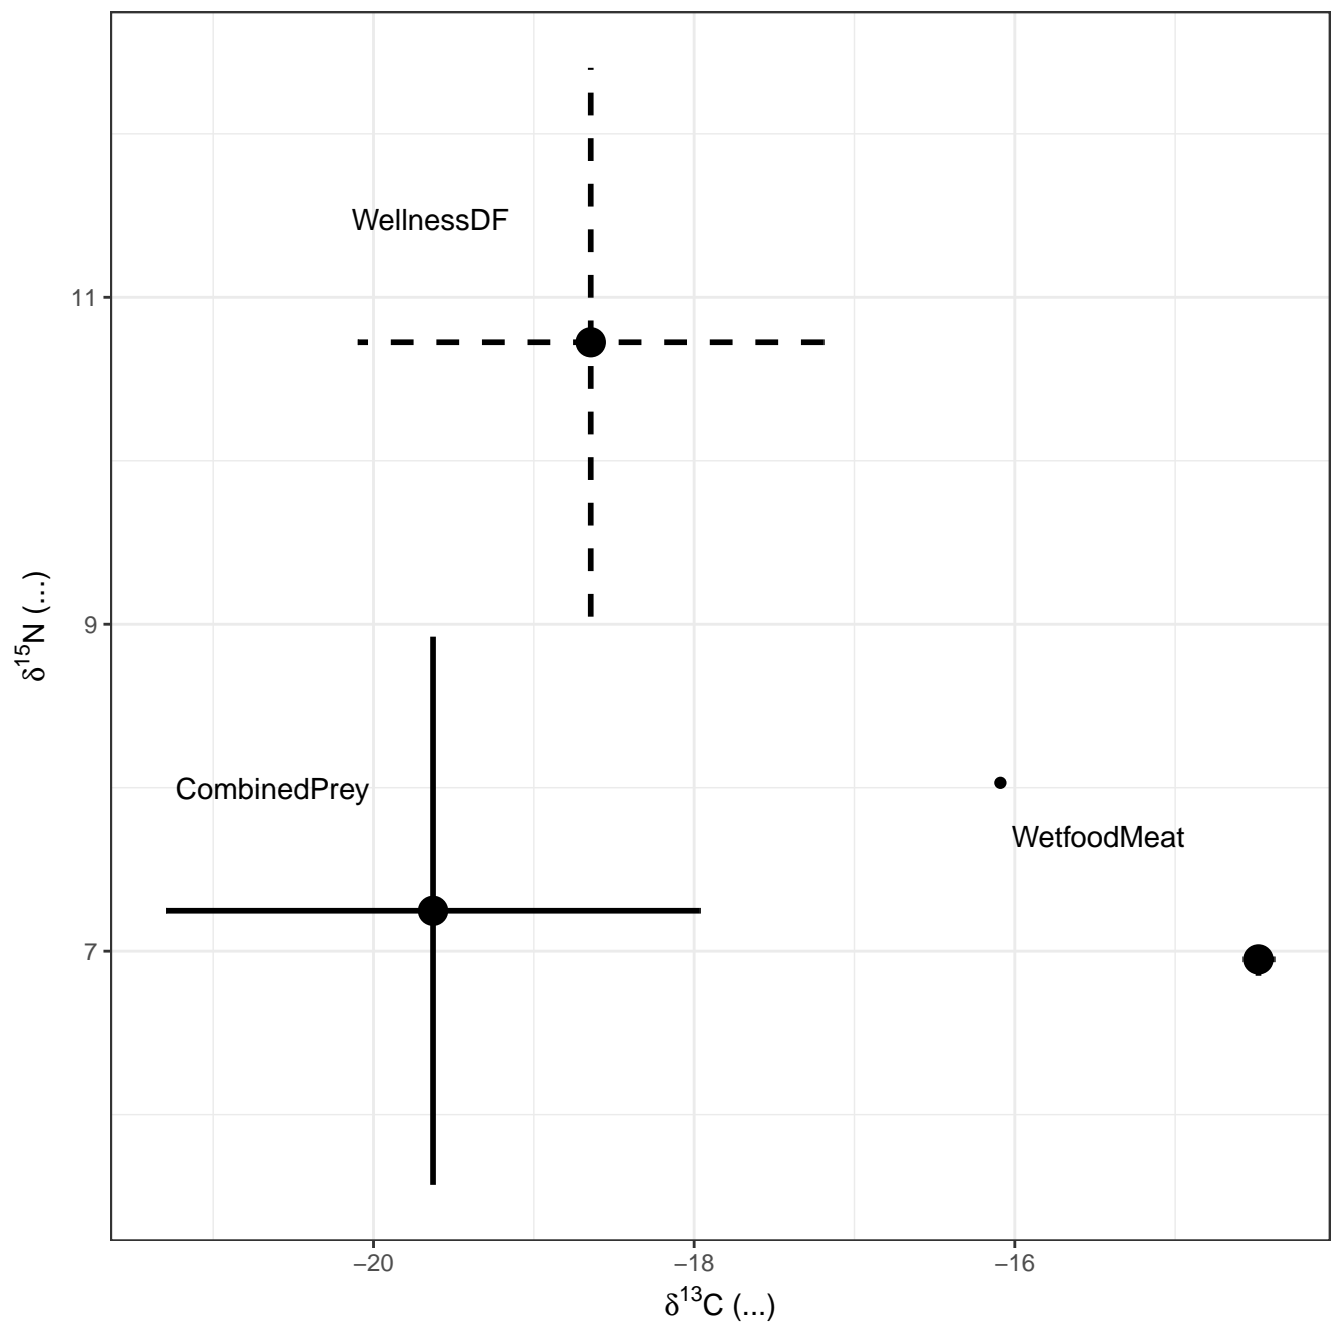

Supplement: Isospace_plots.zip [file Isospace_plots.zip]

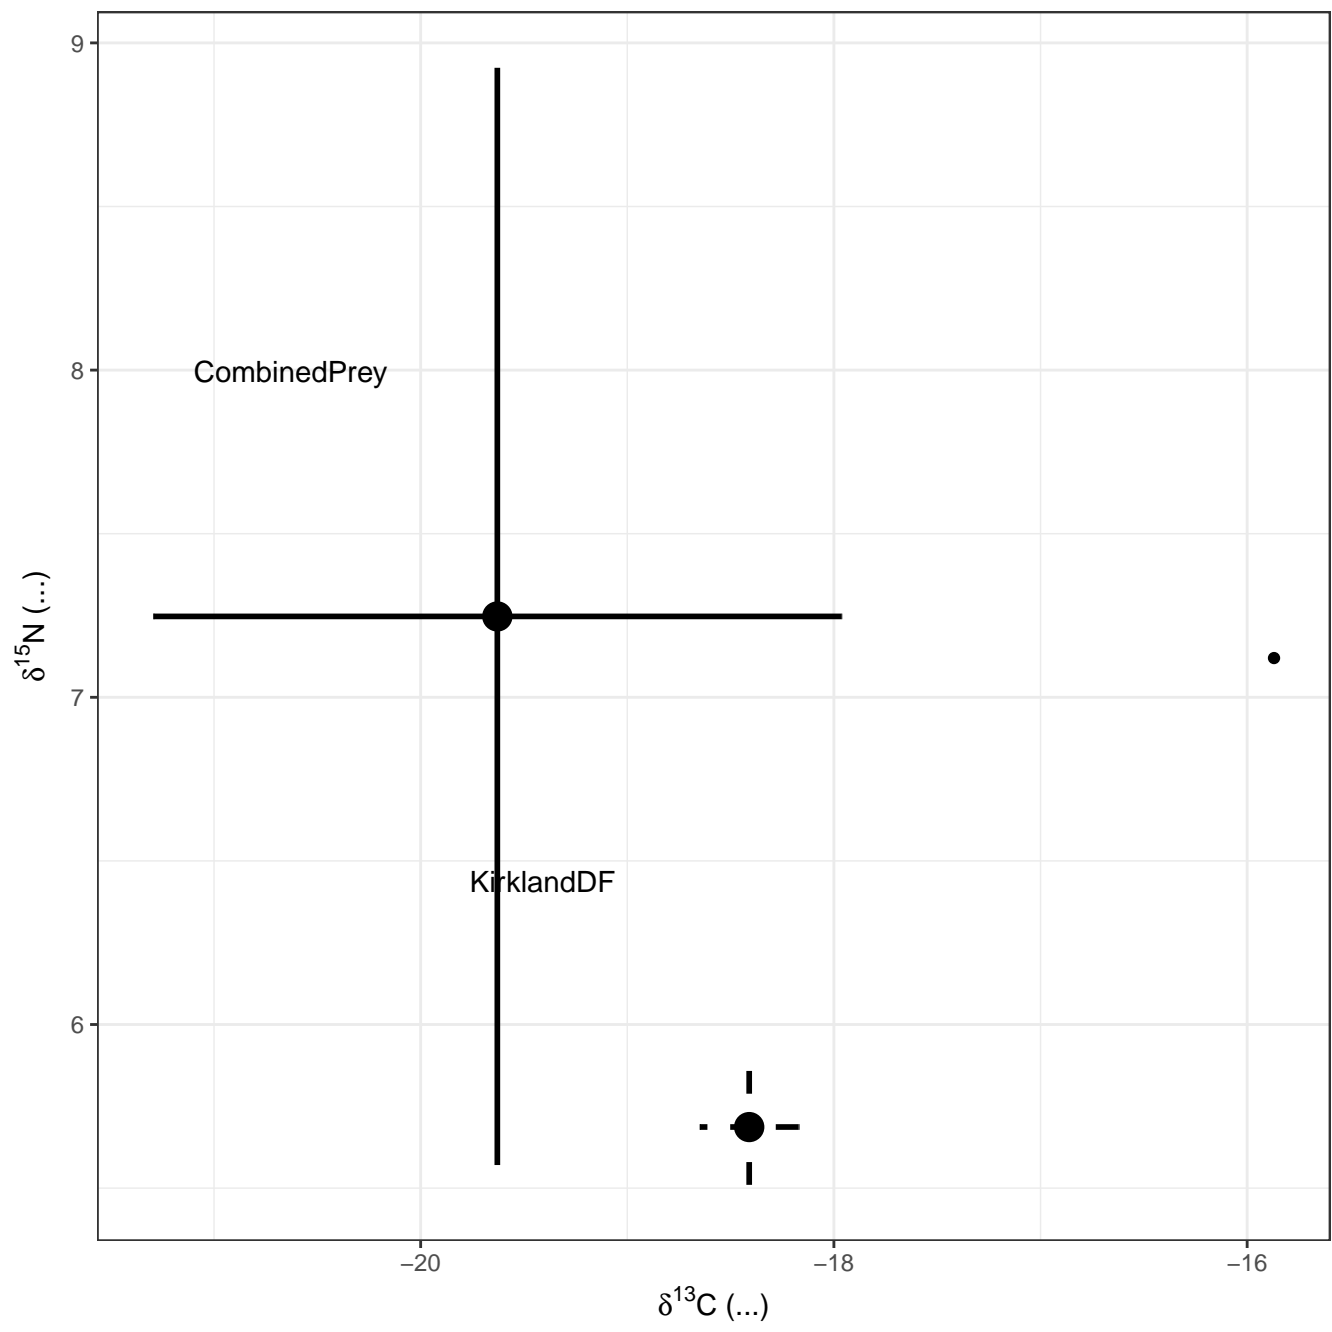

Supplement: Isospace_plots.zip [file Isospace_plots.zip]

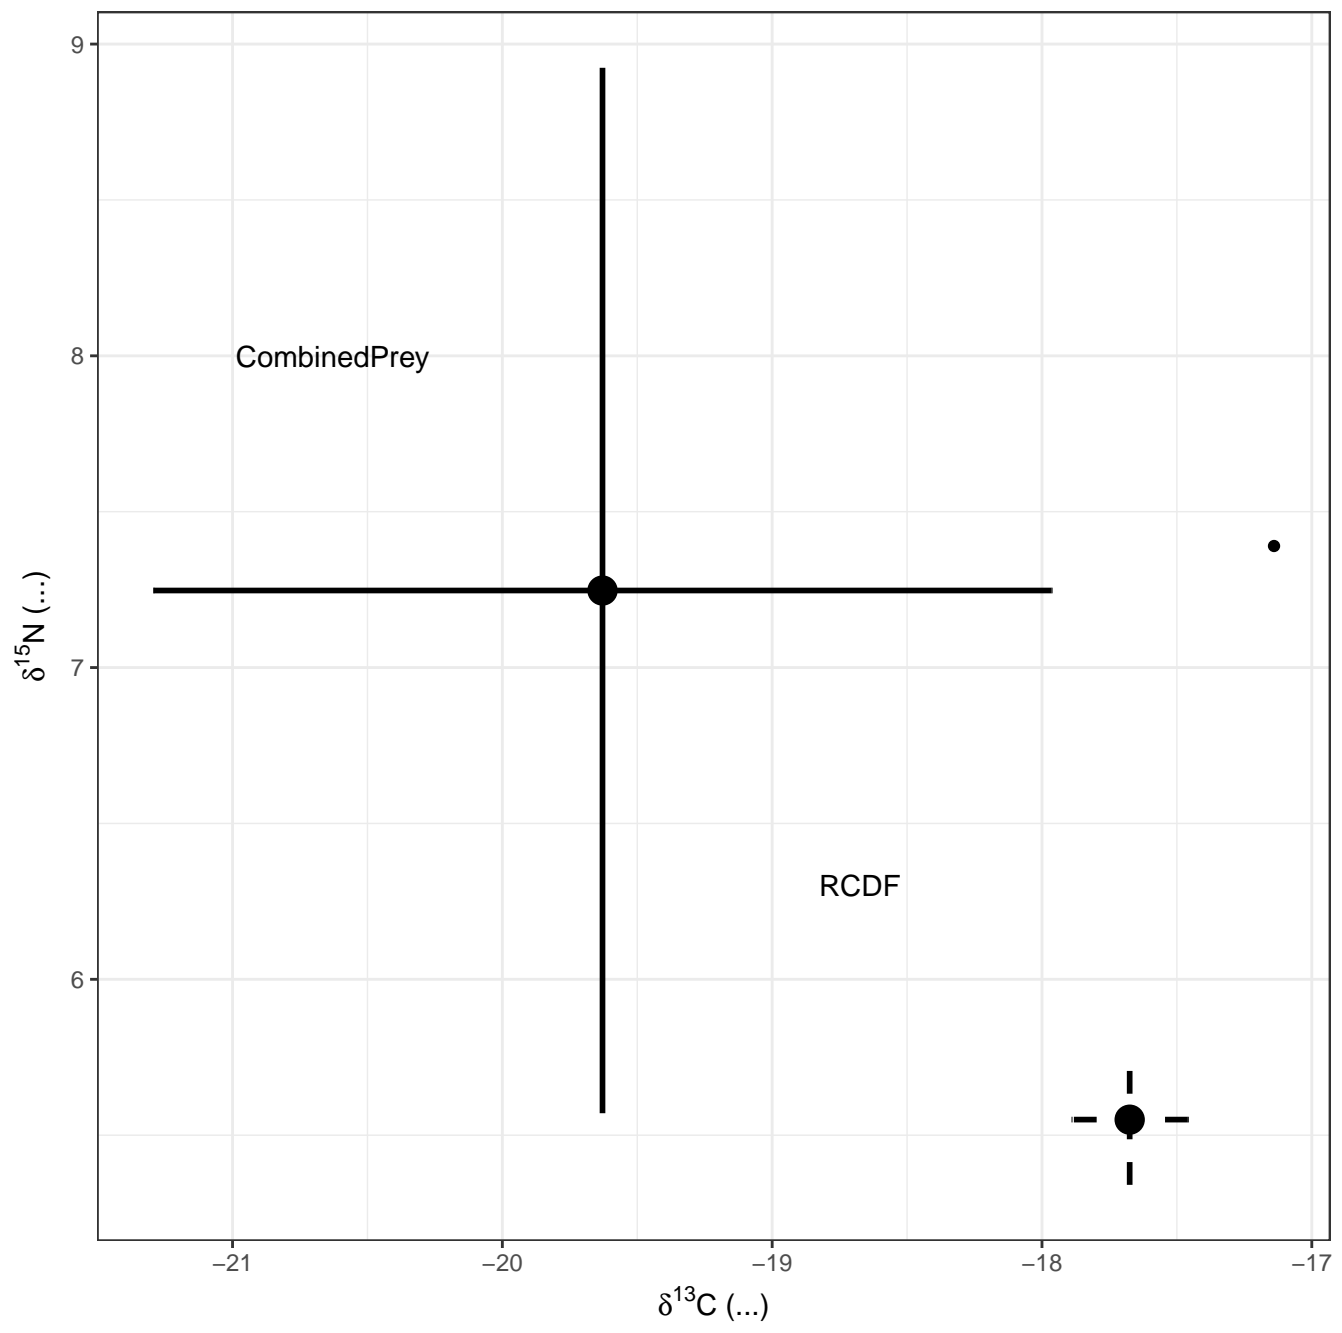

Supplement: Isospace_plots.zip [file Isospace_plots.zip]

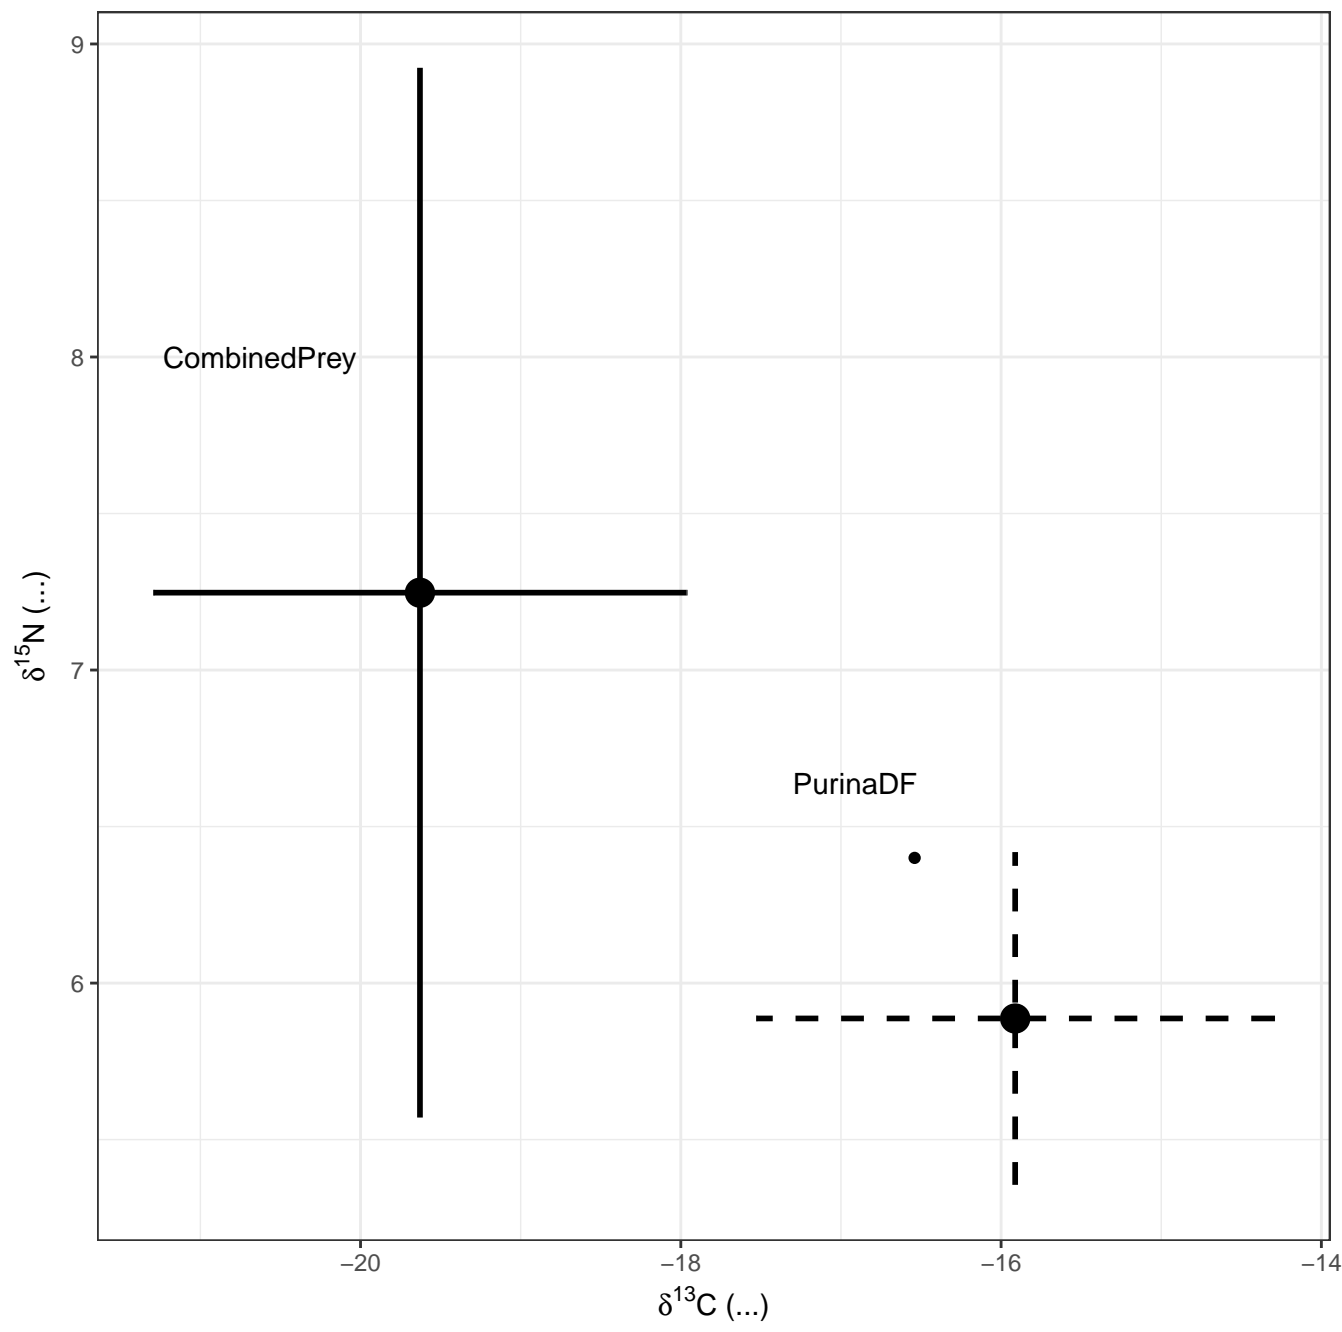

Supplement: Isospace_plots.zip [file Isospace_plots.zip]

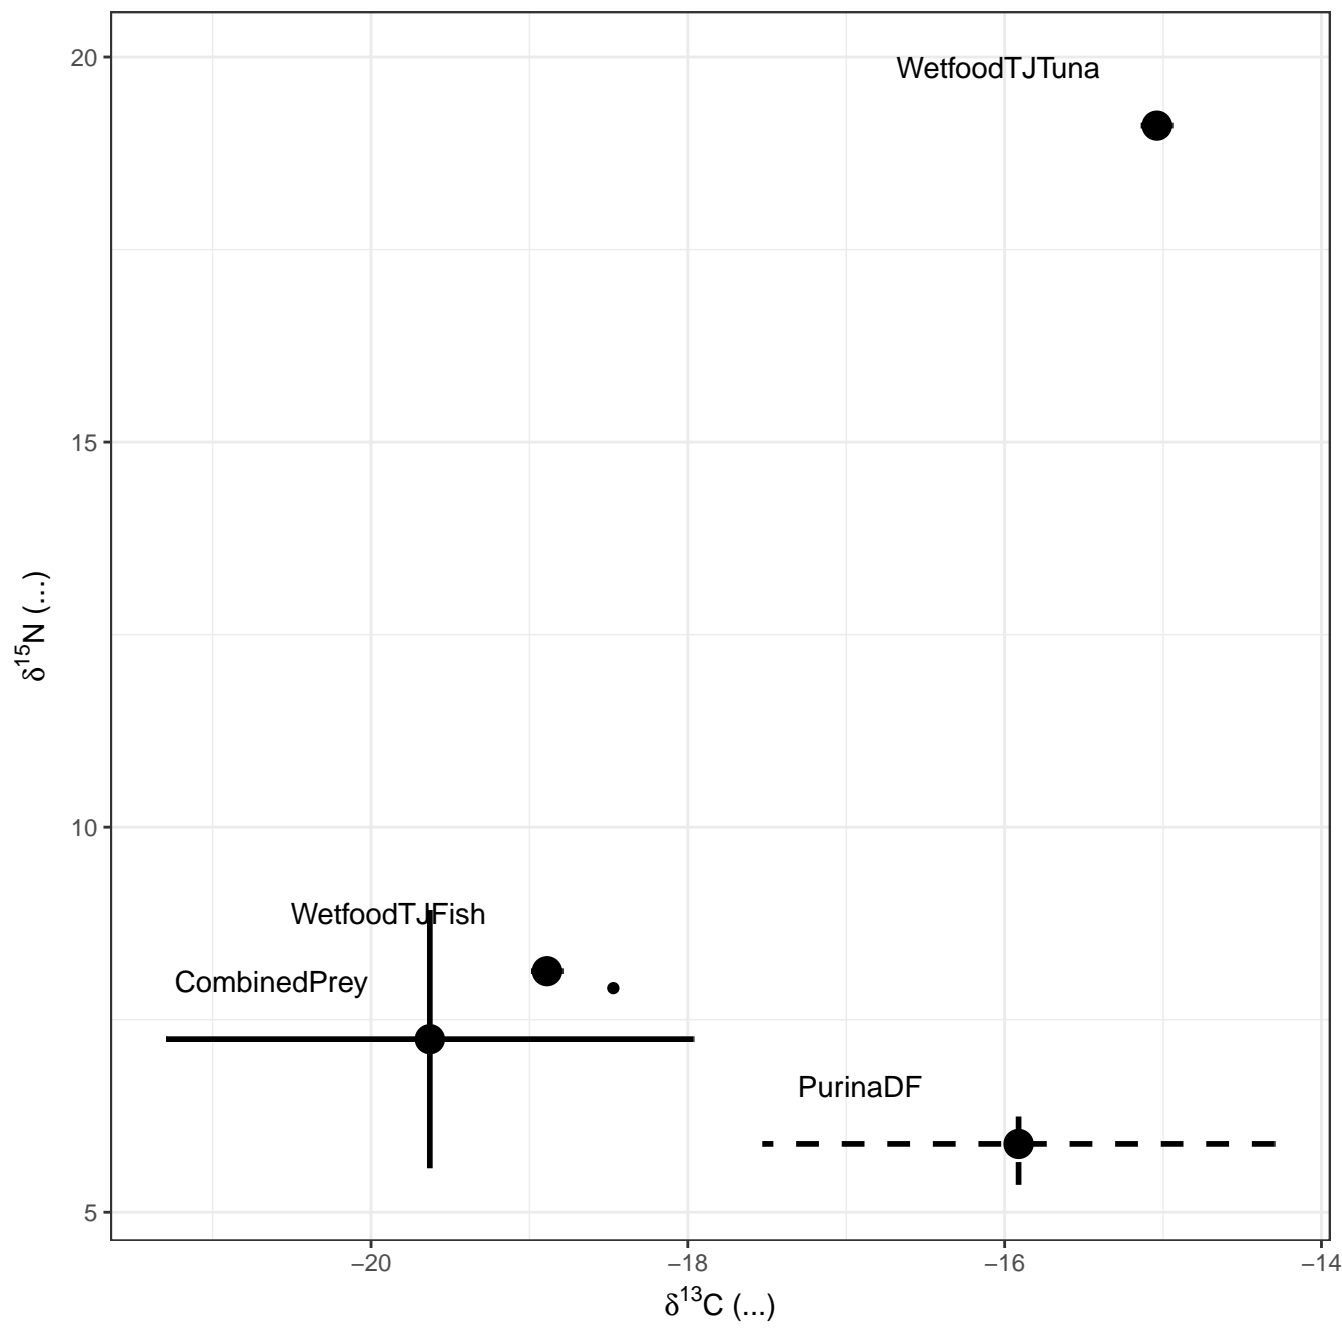

Supplement: Isospace_plots.zip [file Isospace_plots.zip]

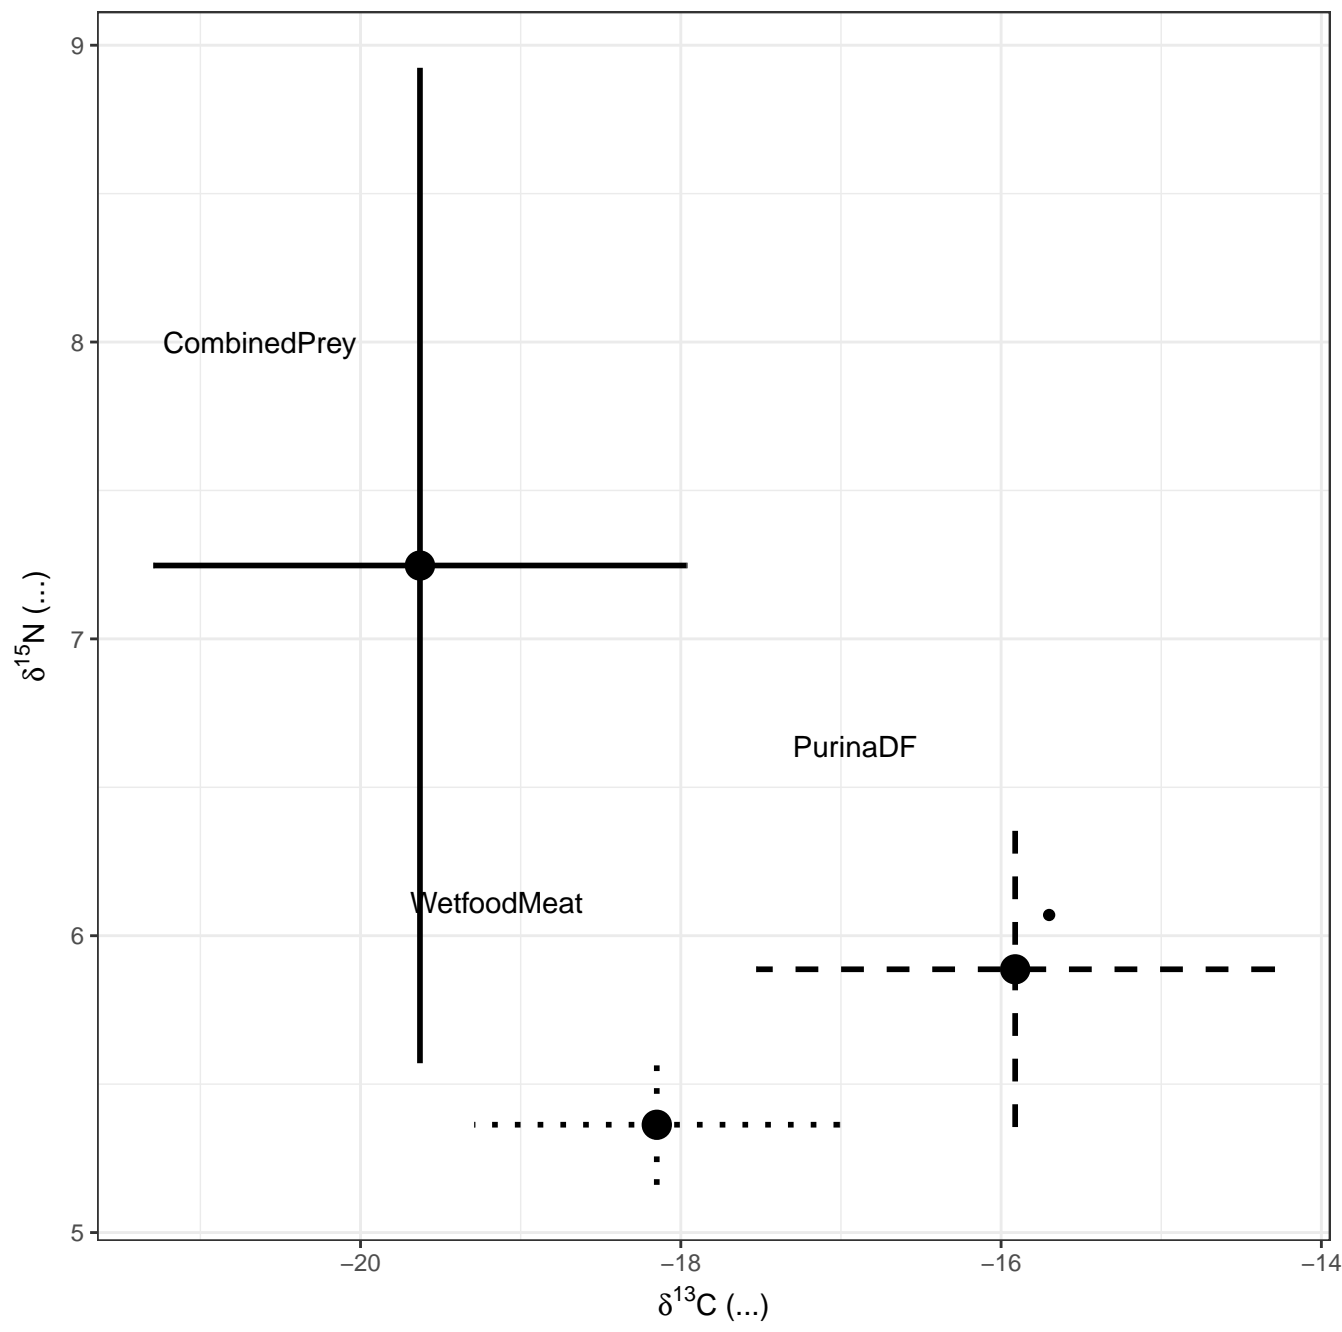

Supplement: Isospace_plots.zip [file Isospace_plots.zip]

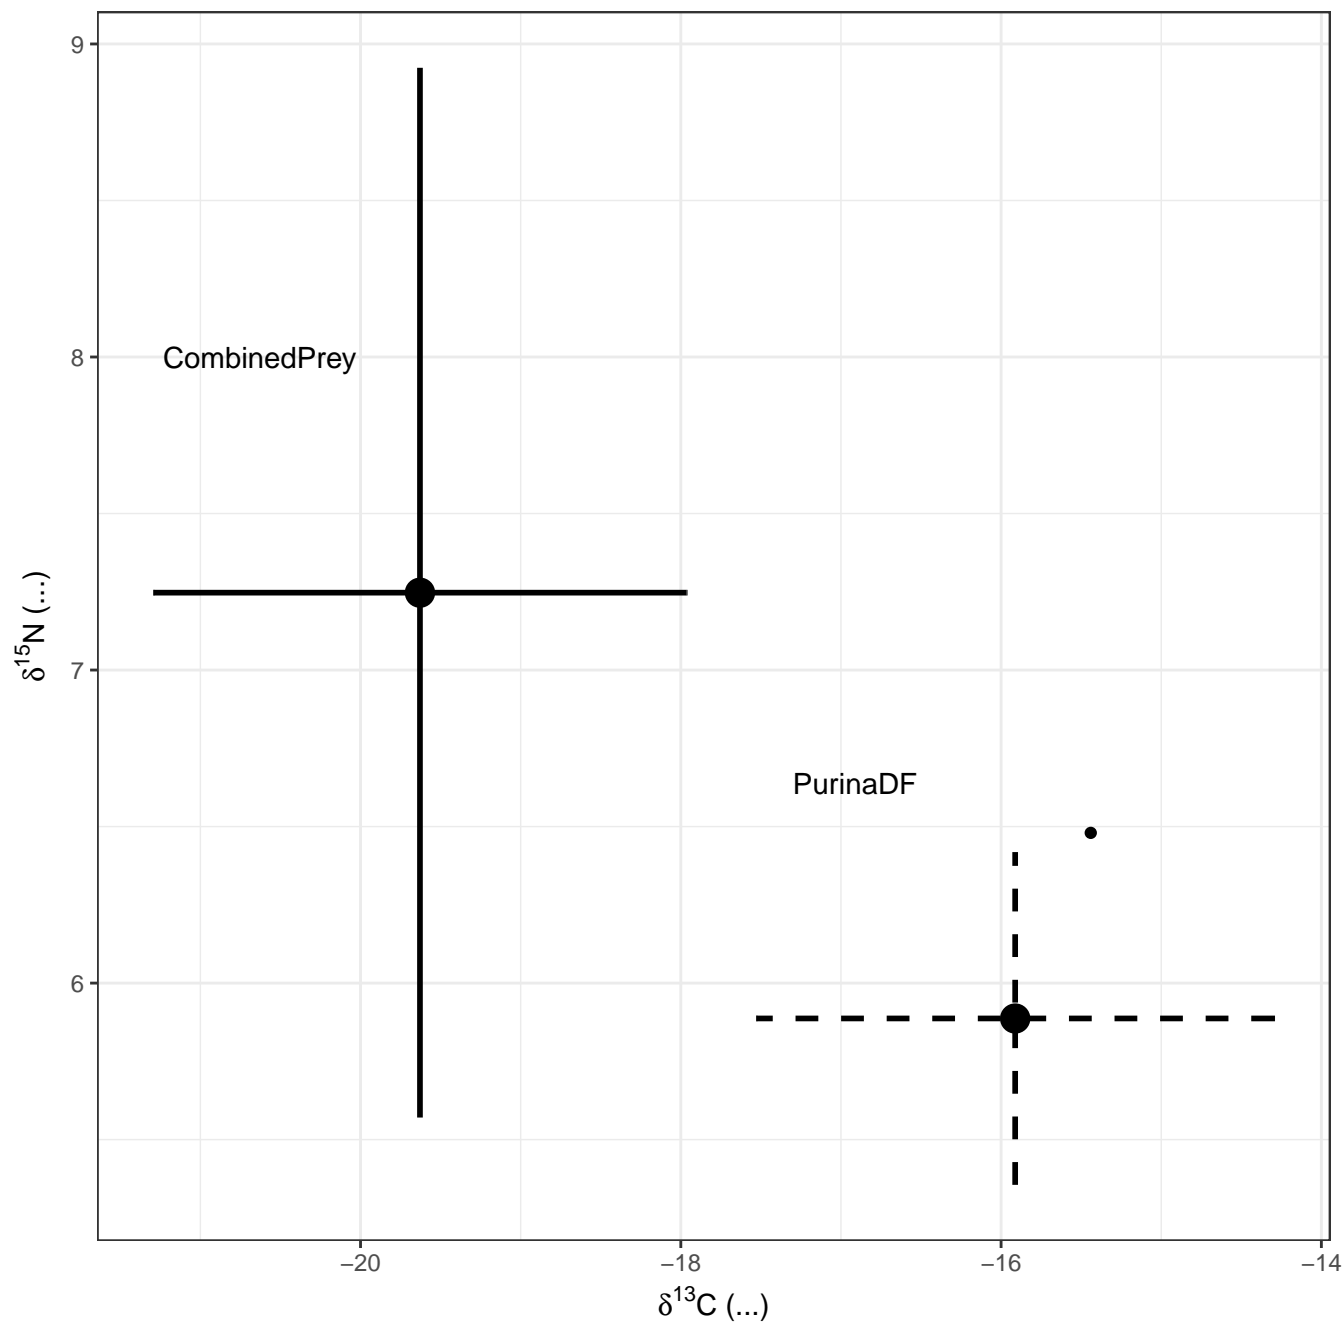

Supplement: Isospace_plots.zip [file Isospace_plots.zip]

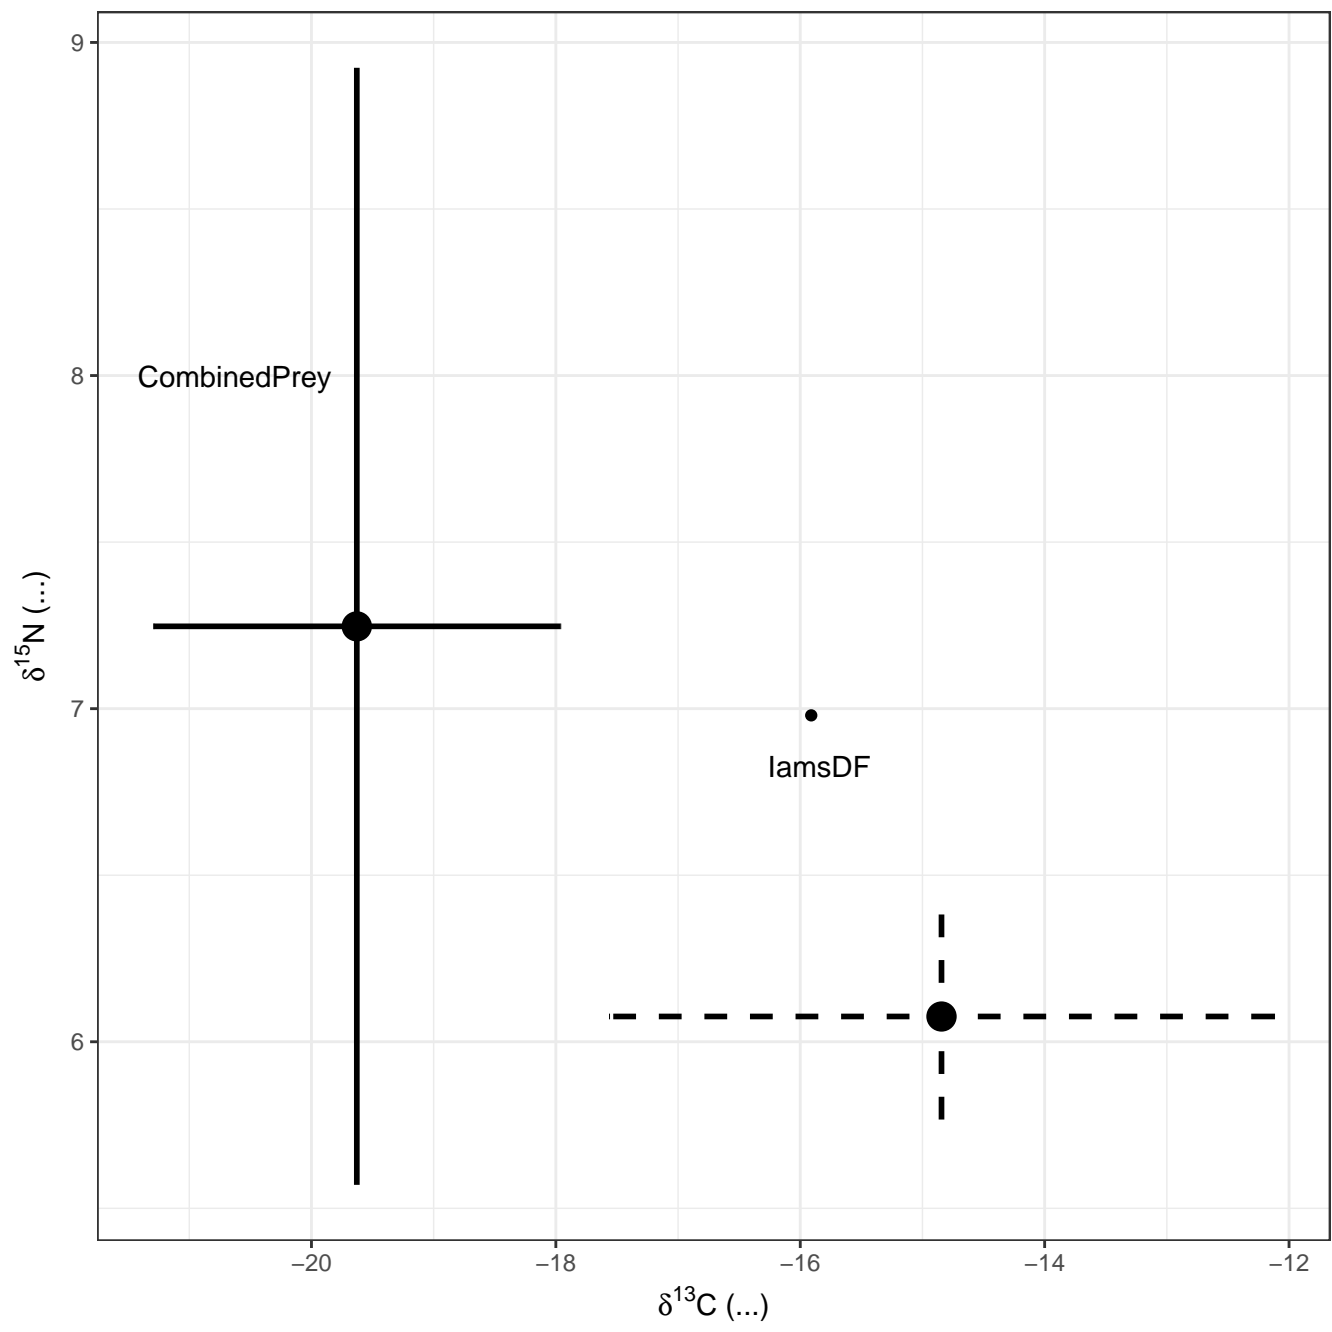

Supplement: Isospace_plots.zip [file Isospace_plots.zip]

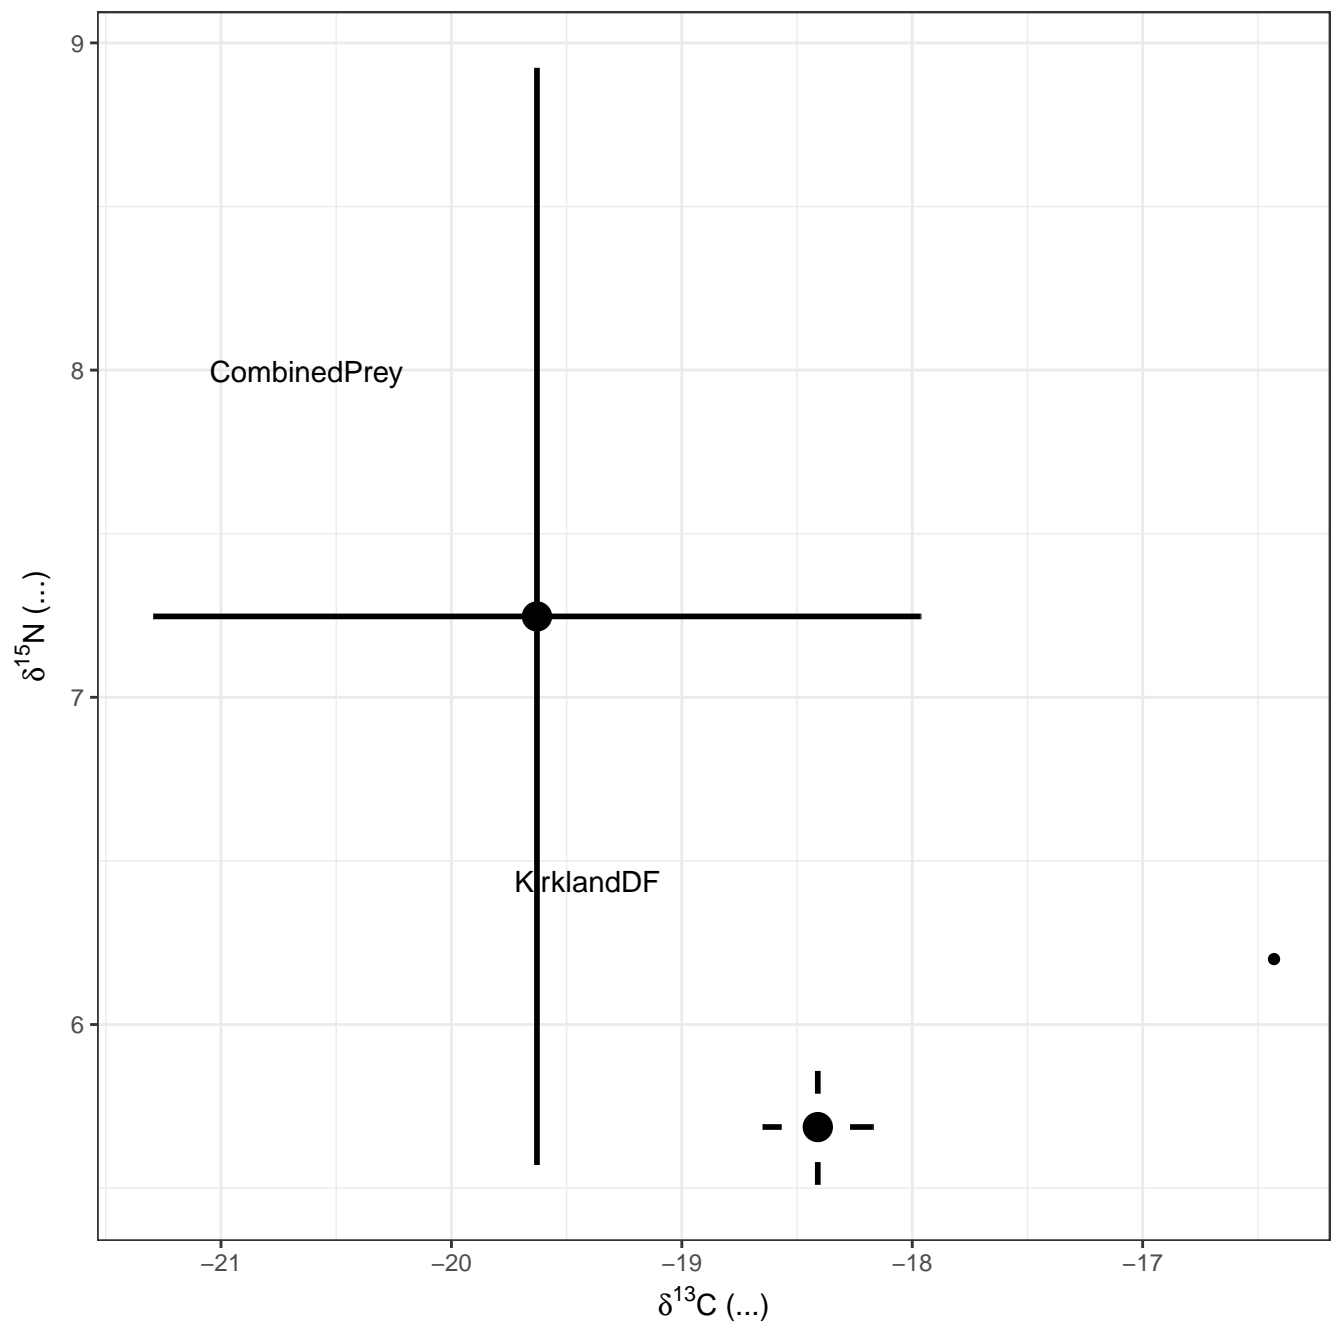

Supplement: Isospace_plots.zip [file Isospace_plots.zip]

# Overall Population

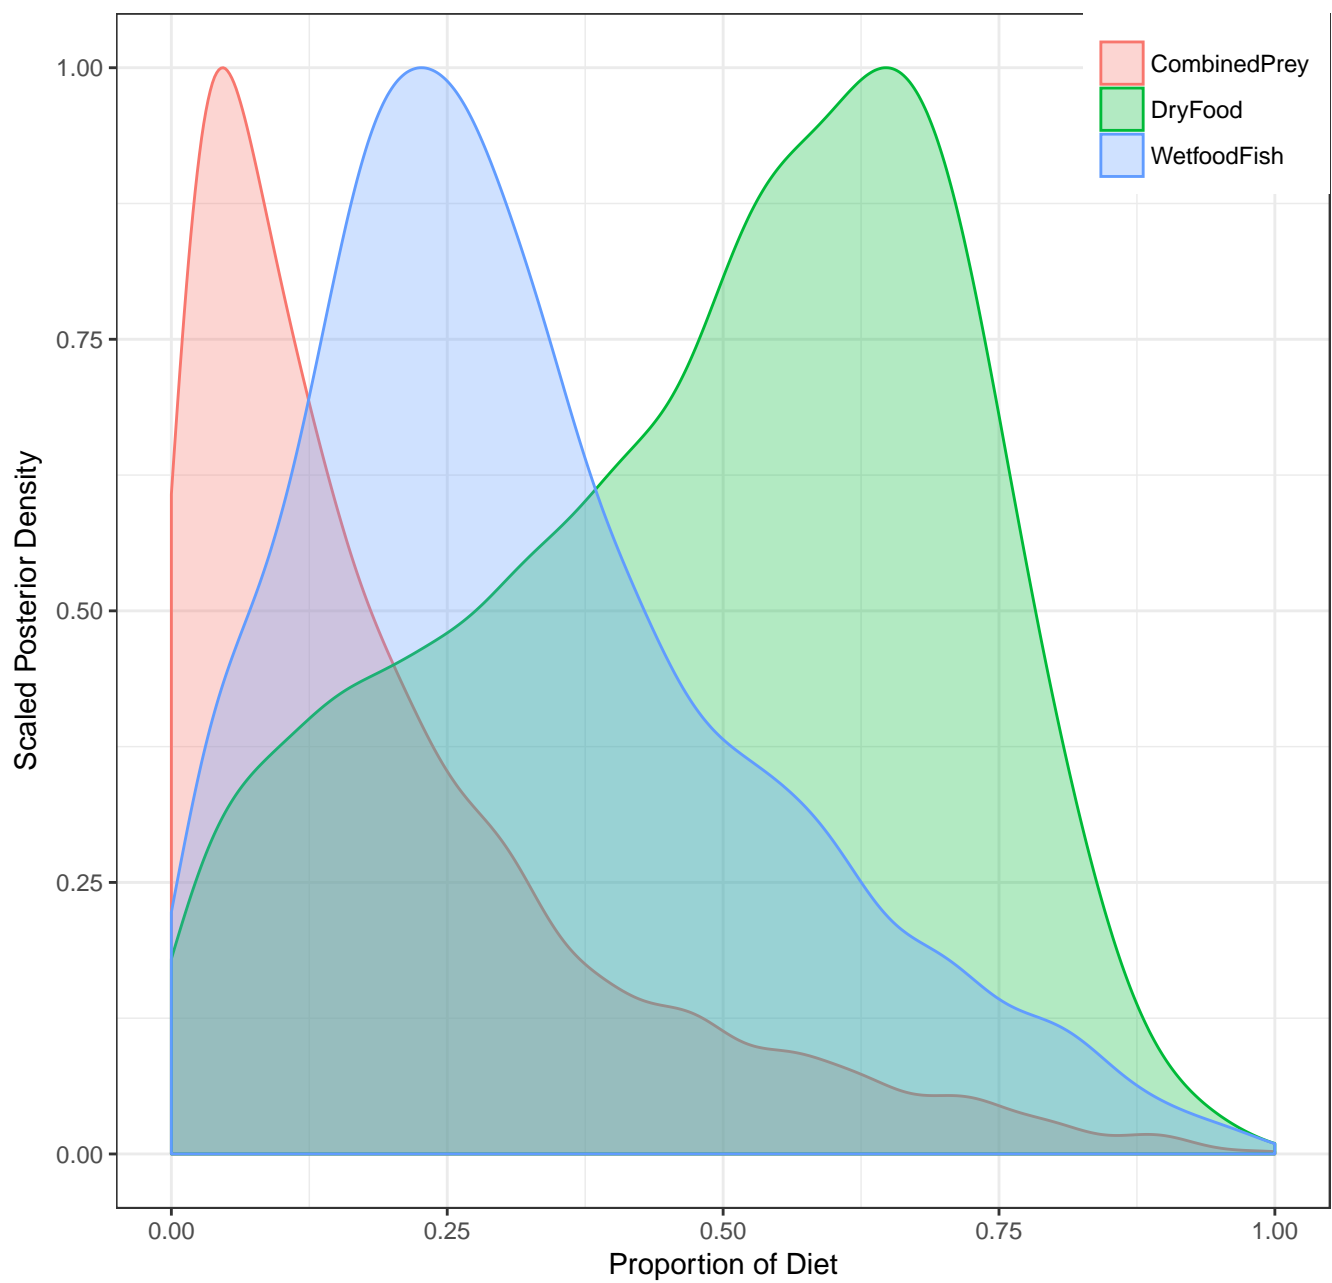

Supplement: Scaled_posterior_density_charts.zip [file Scaled_posterior_density_charts.zip]

# Overall Population

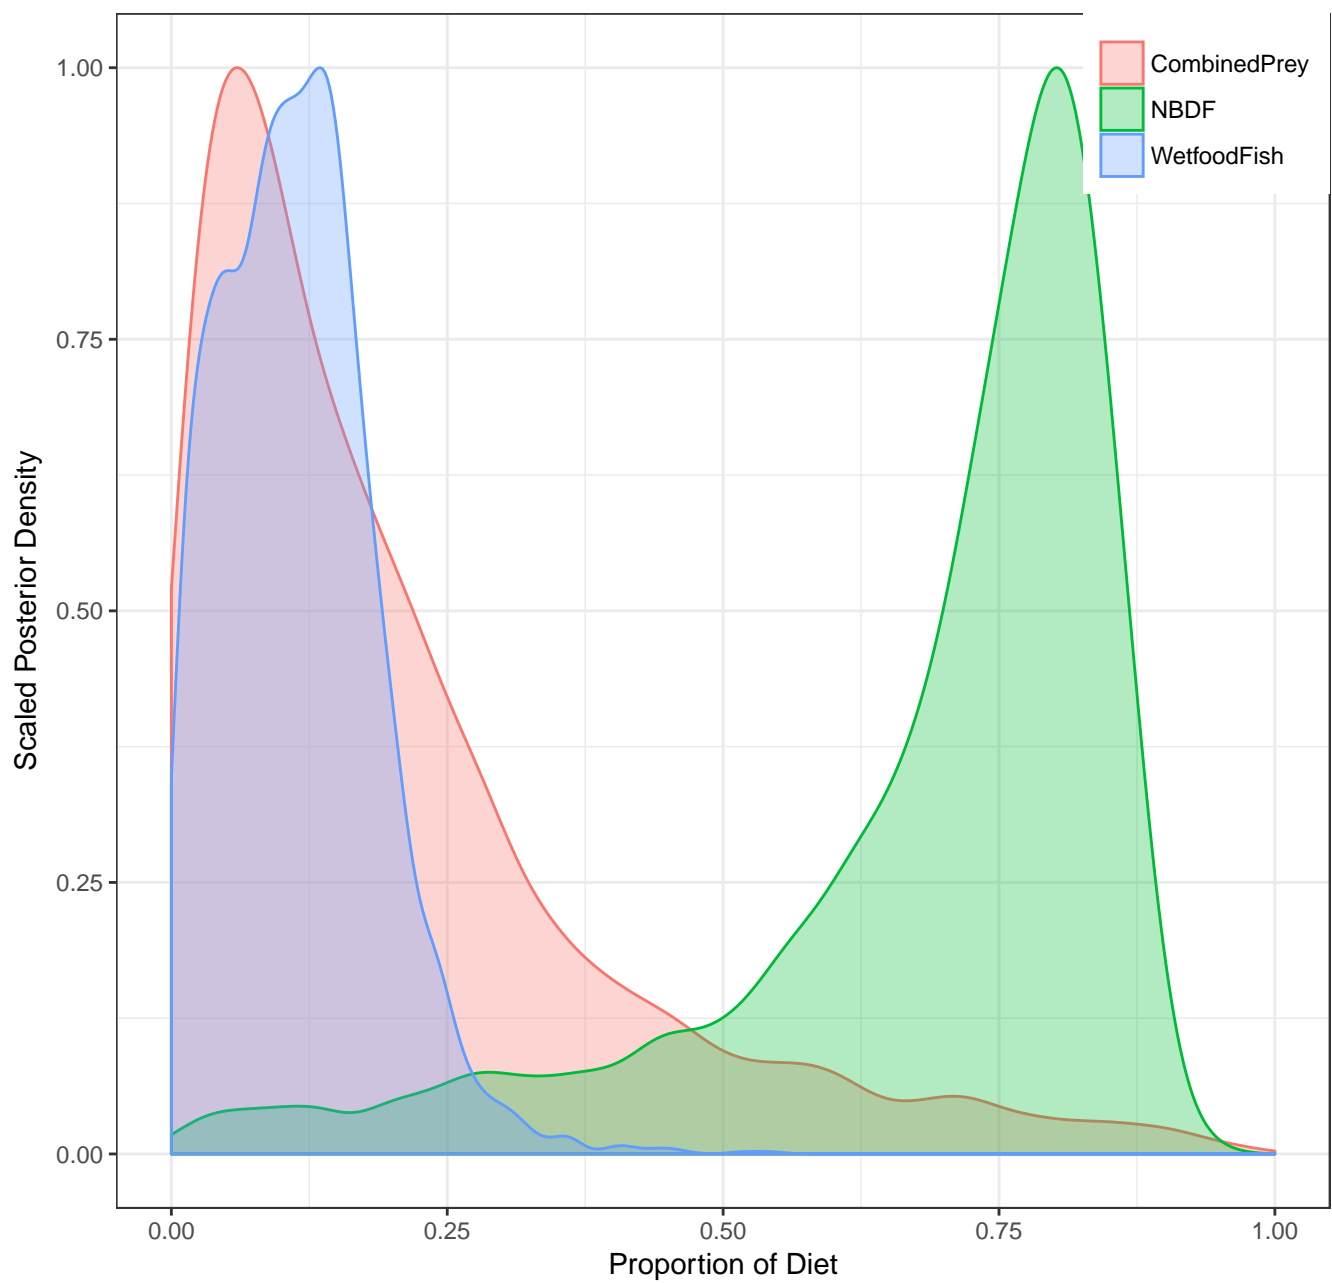

Supplement: Scaled_posterior_density_charts.zip [file Scaled_posterior_density_charts.zip]

# Overall Population

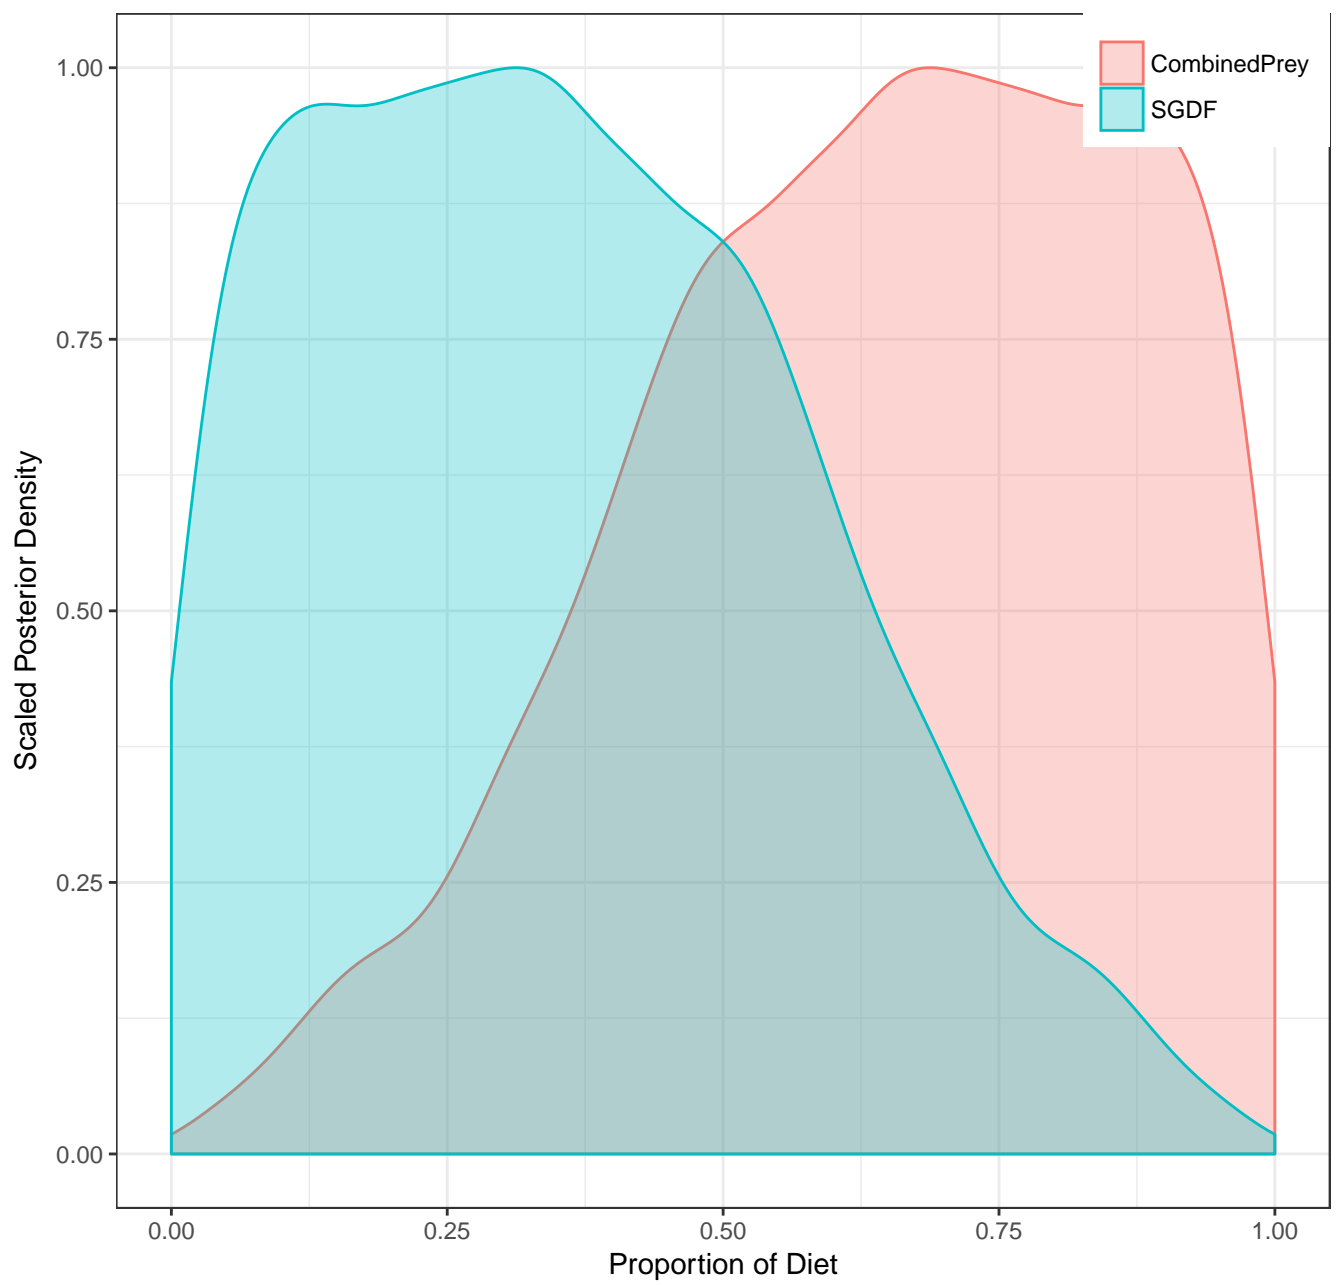

Supplement: Scaled_posterior_density_charts.zip [file Scaled_posterior_density_charts.zip]

# Overall Population

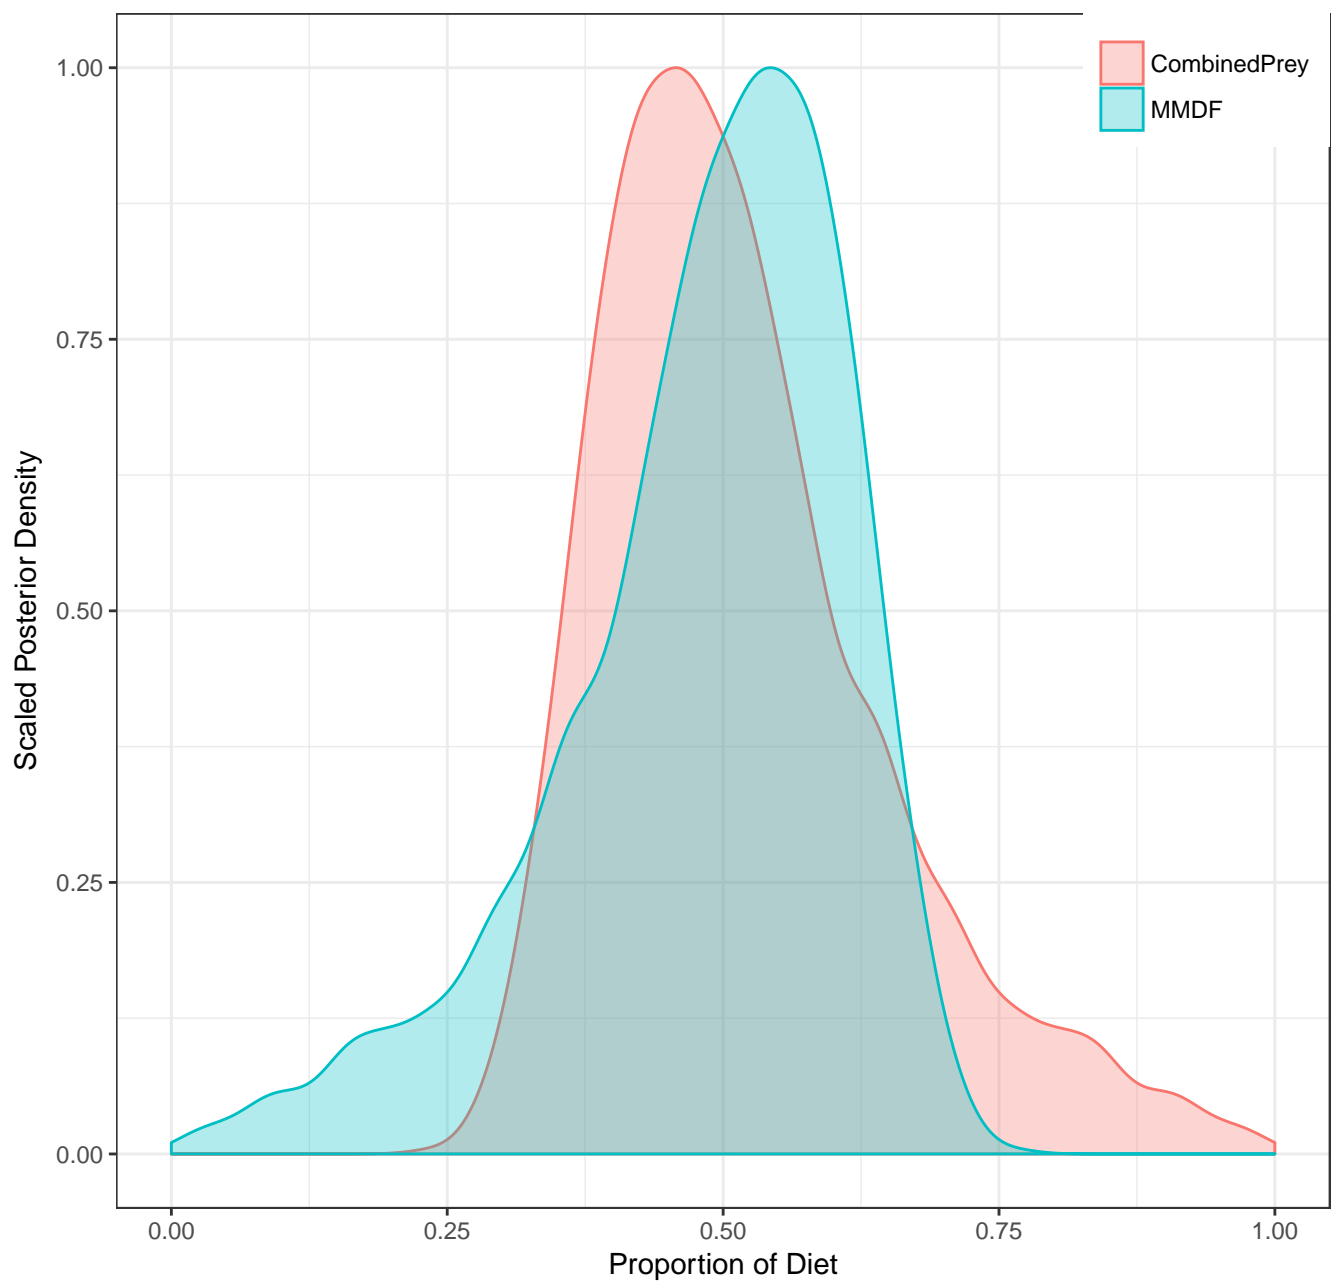

Supplement: Scaled_posterior_density_charts.zip [file Scaled_posterior_density_charts.zip]

# Overall Population

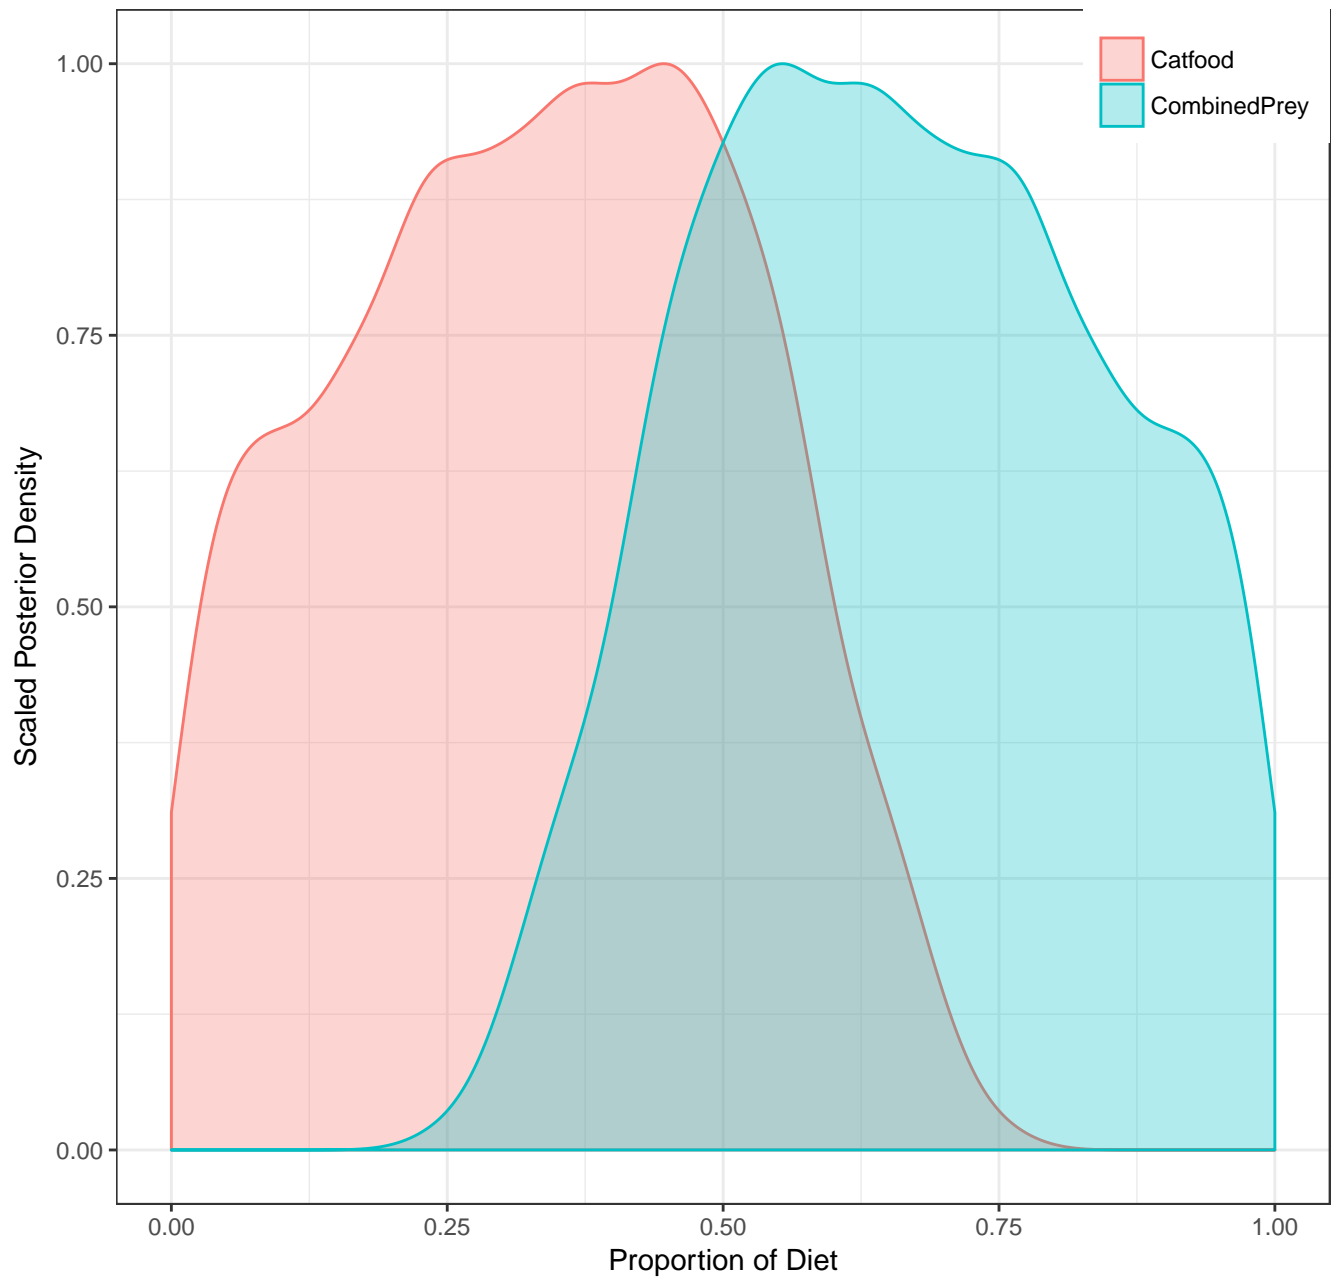

Supplement: Scaled_posterior_density_charts.zip [file Scaled_posterior_density_charts.zip]

# Overall Population

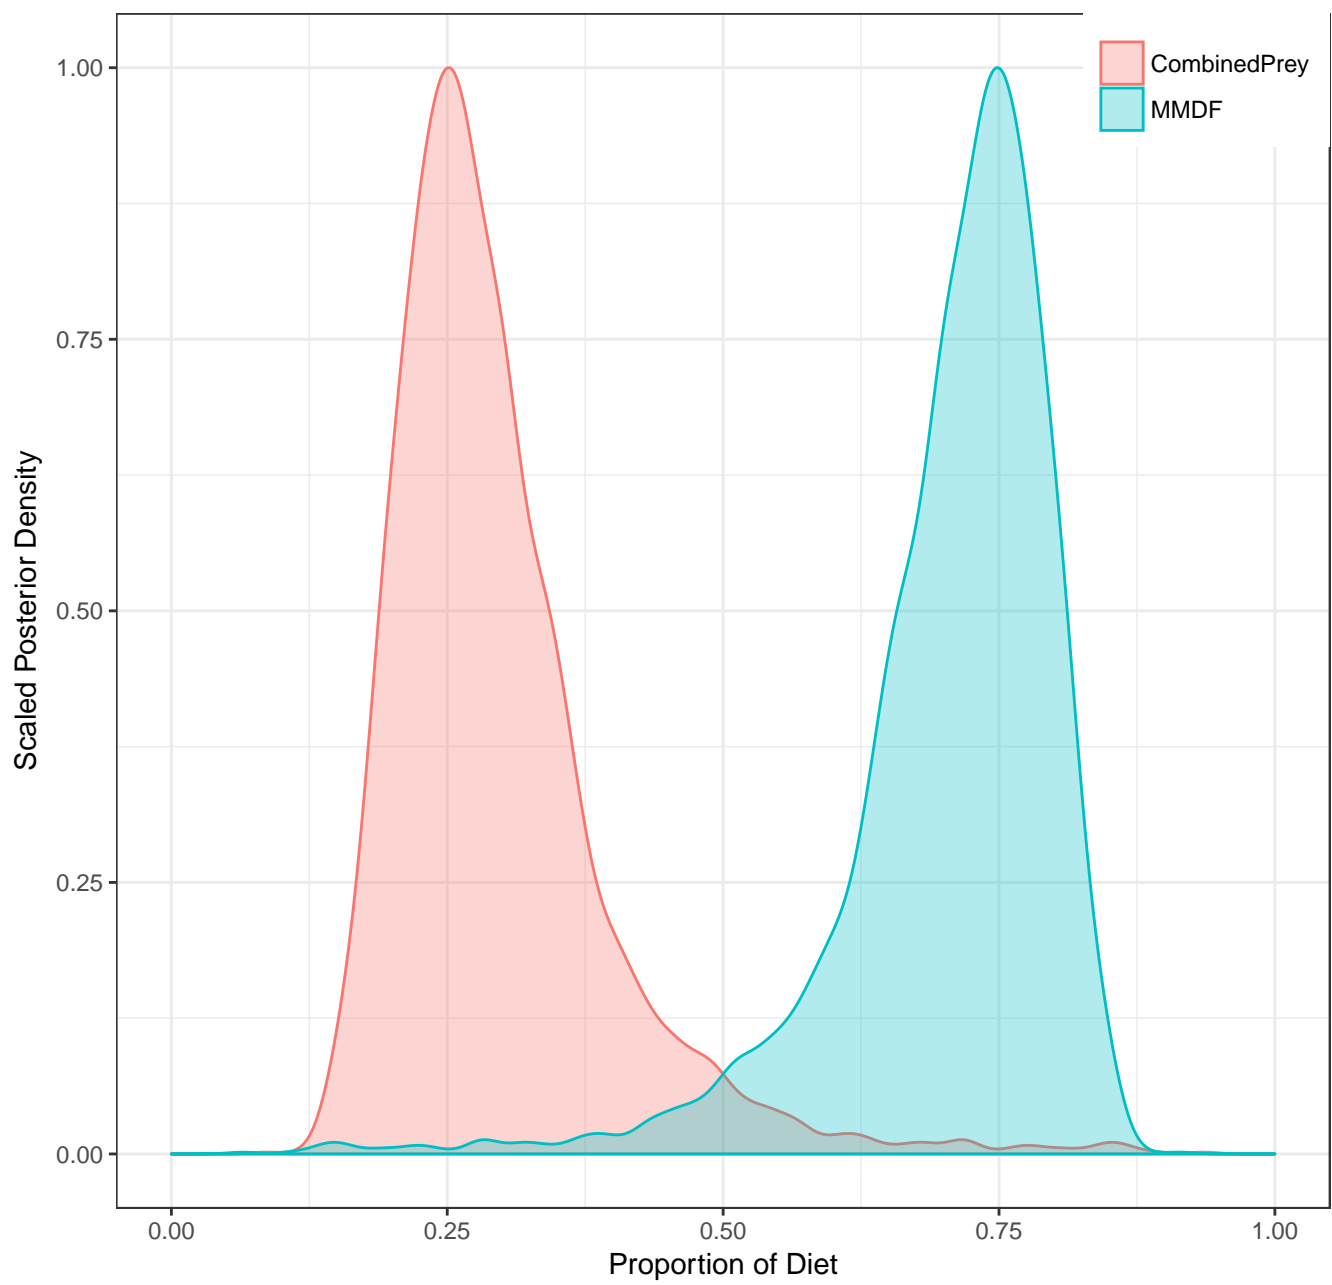

Supplement: Scaled_posterior_density_charts.zip [file Scaled_posterior_density_charts.zip]

# Overall Population

Scaled Posterior Density

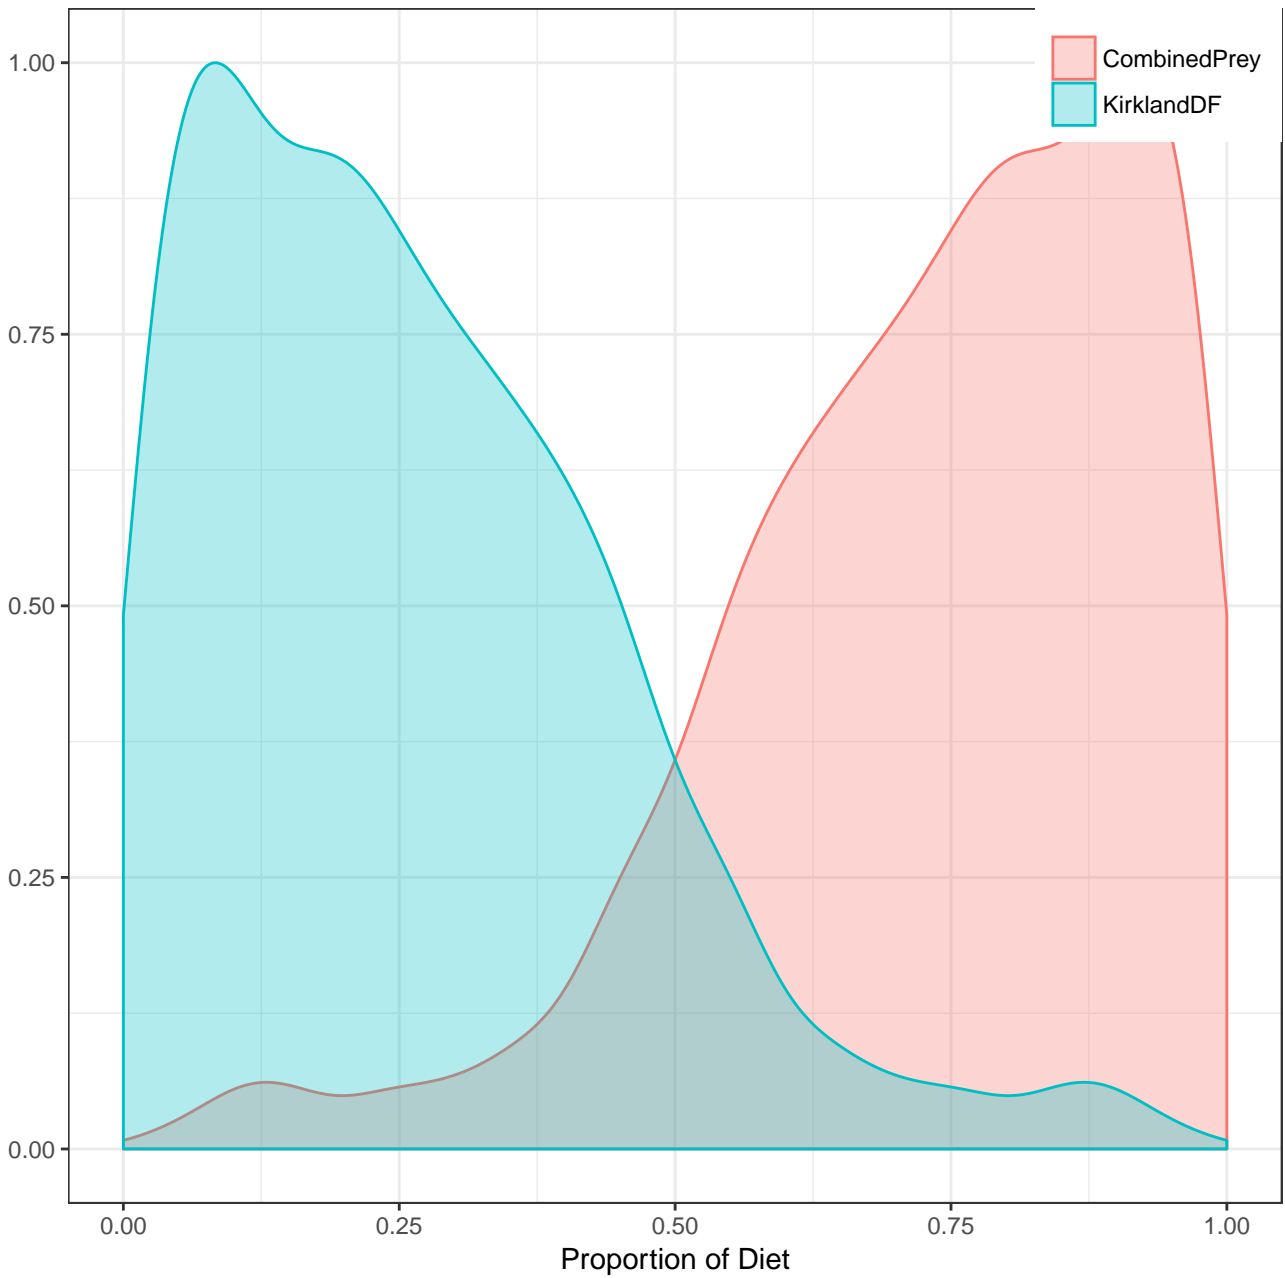

Supplement: Scaled_posterior_density_charts.zip [file Scaled_posterior_density_charts.zip]

# Overall Population

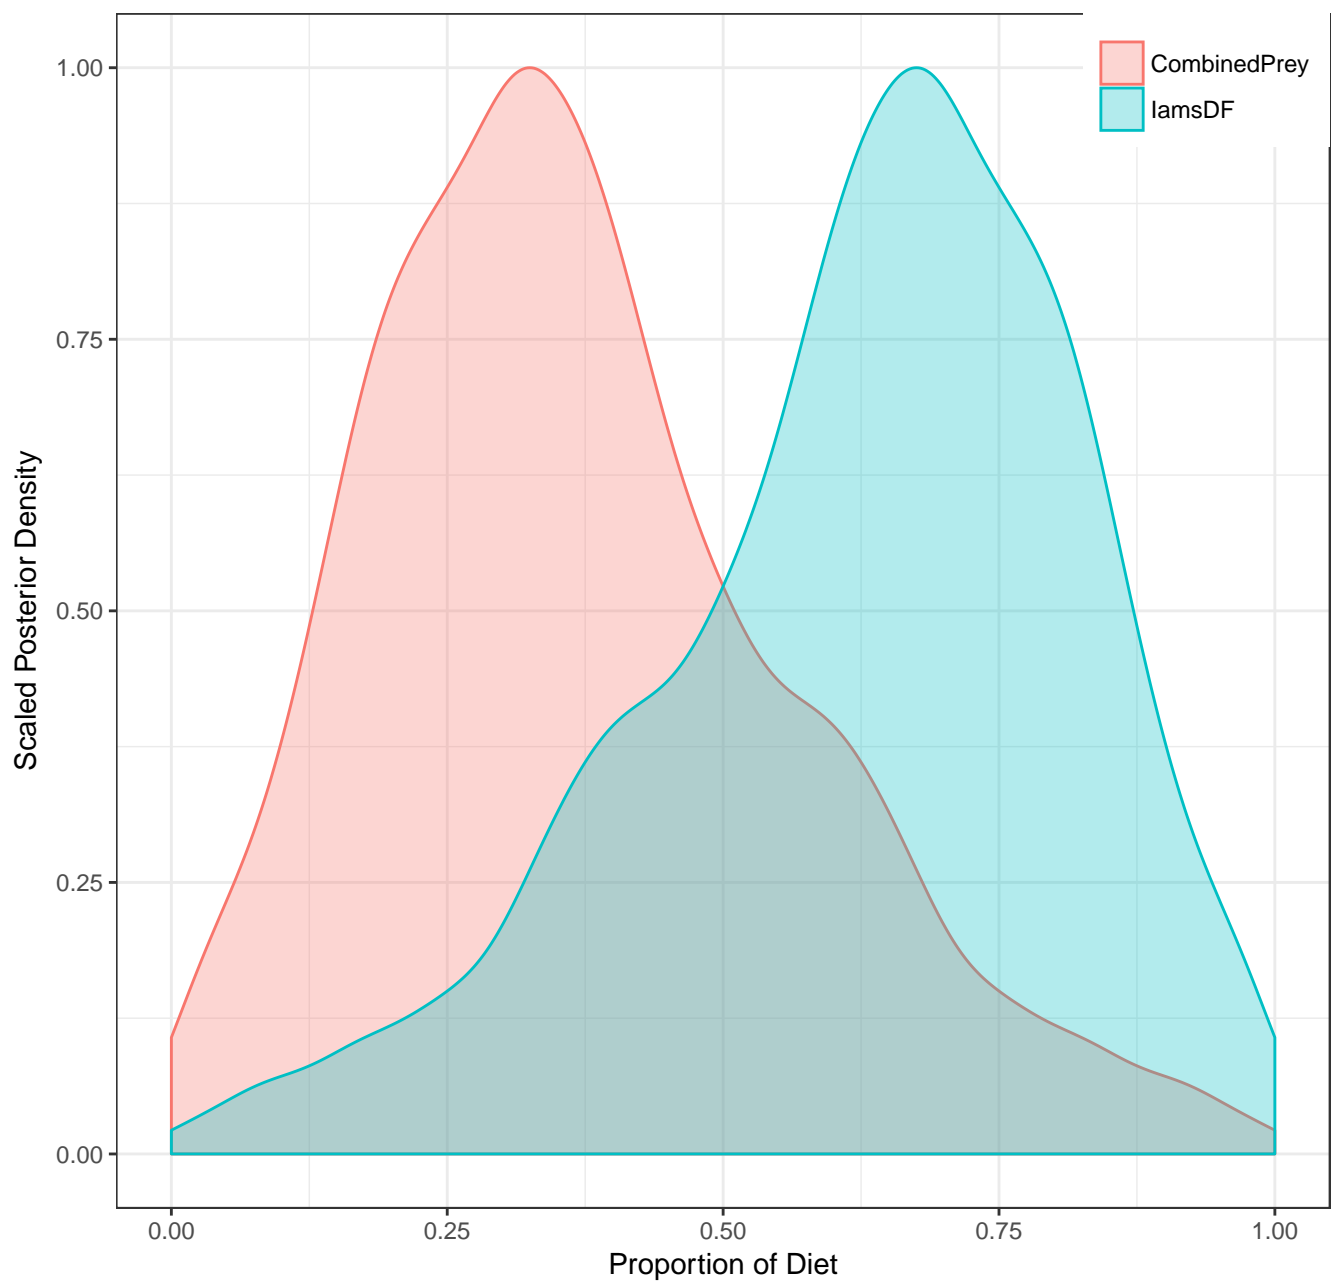

Supplement: Scaled_posterior_density_charts.zip [file Scaled_posterior_density_charts.zip]

# Overall Population

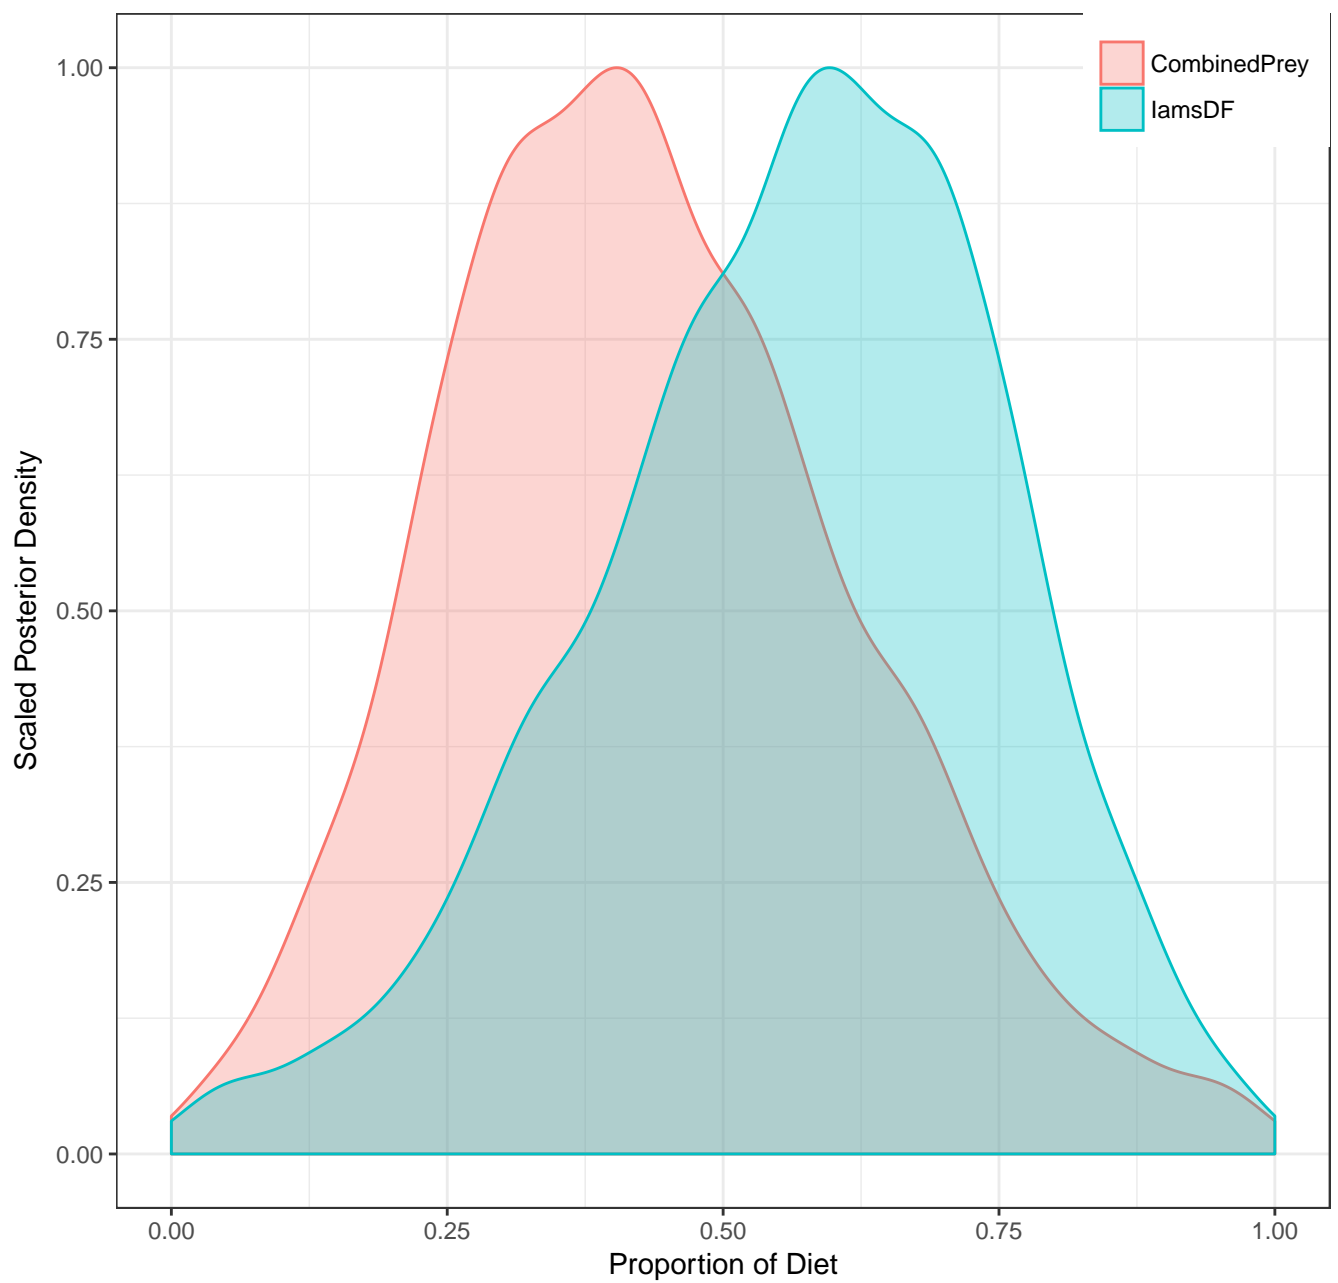

Supplement: Scaled_posterior_density_charts.zip [file Scaled_posterior_density_charts.zip]

# Overall Population

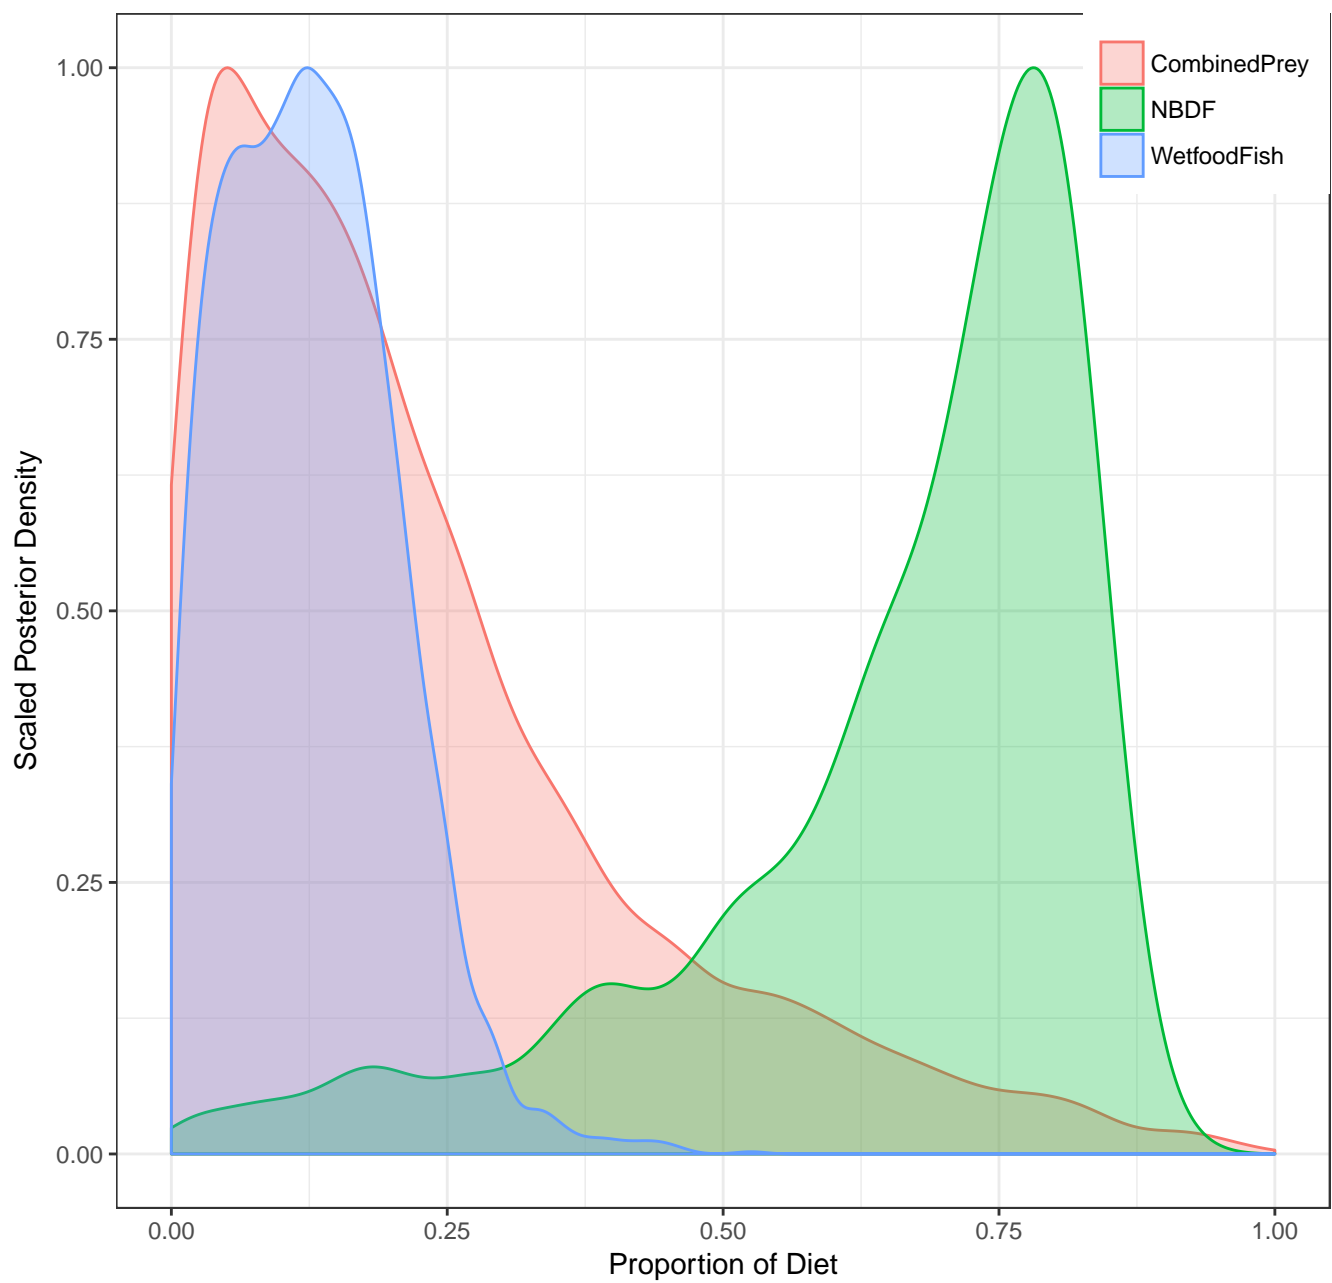

Supplement: Scaled_posterior_density_charts.zip [file Scaled_posterior_density_charts.zip]

# Overall Population

Scaled Posterior Density

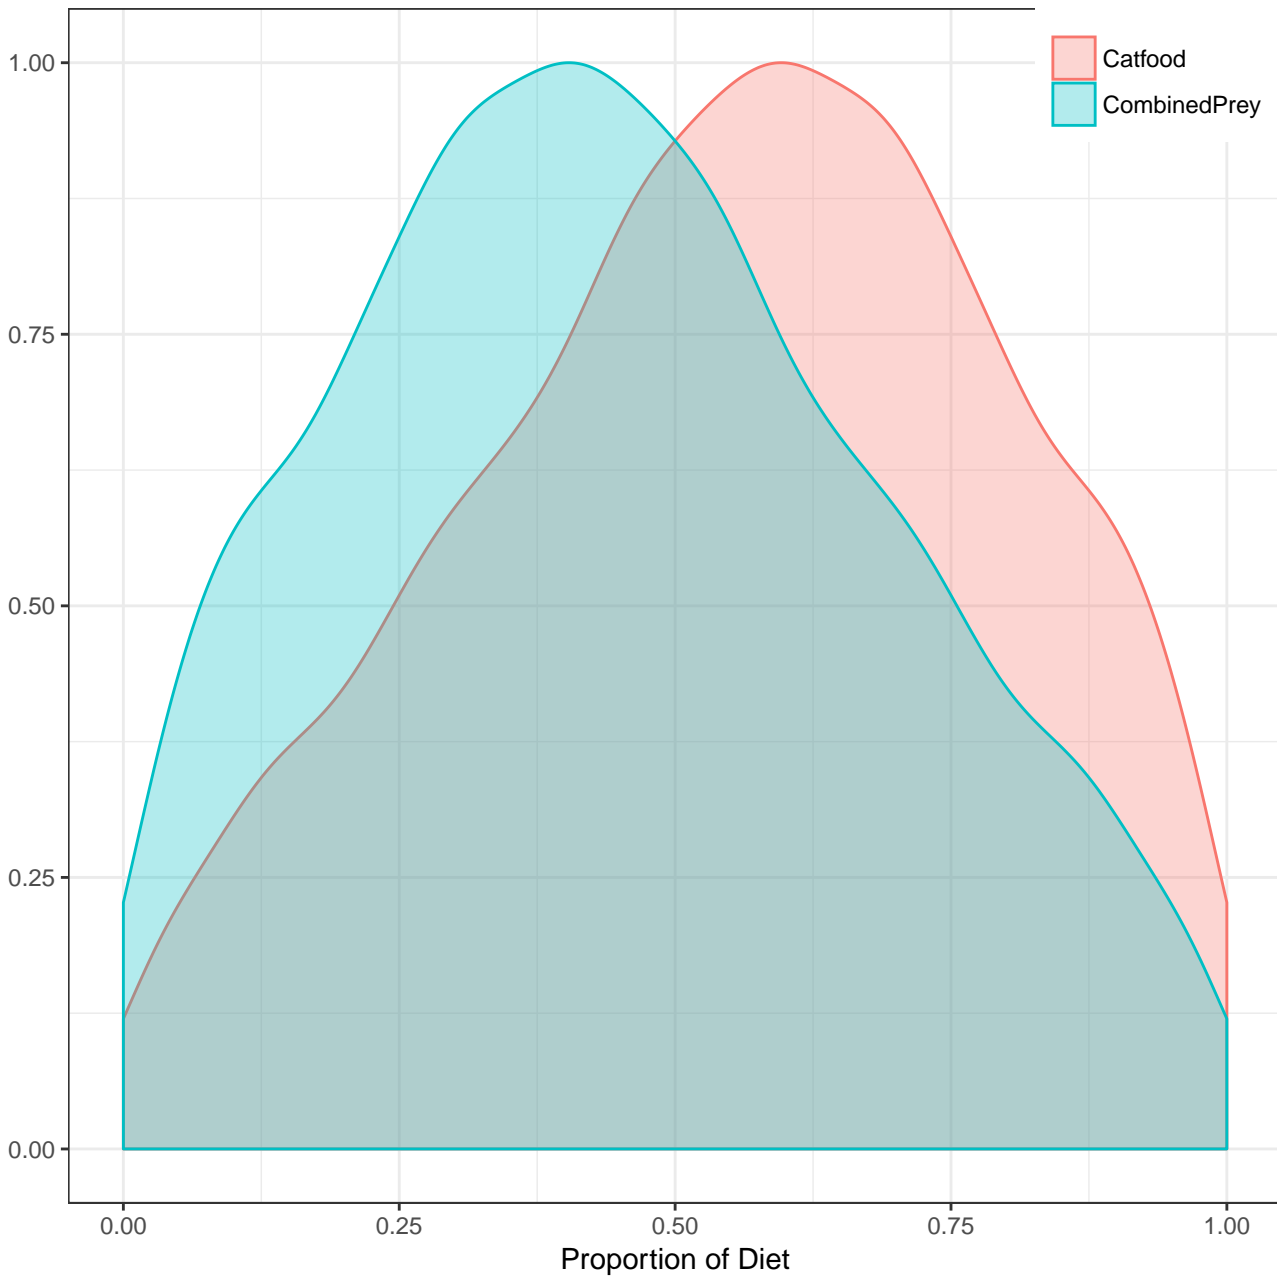

Supplement: Scaled_posterior_density_charts.zip [file Scaled_posterior_density_charts.zip]

# Overall Population

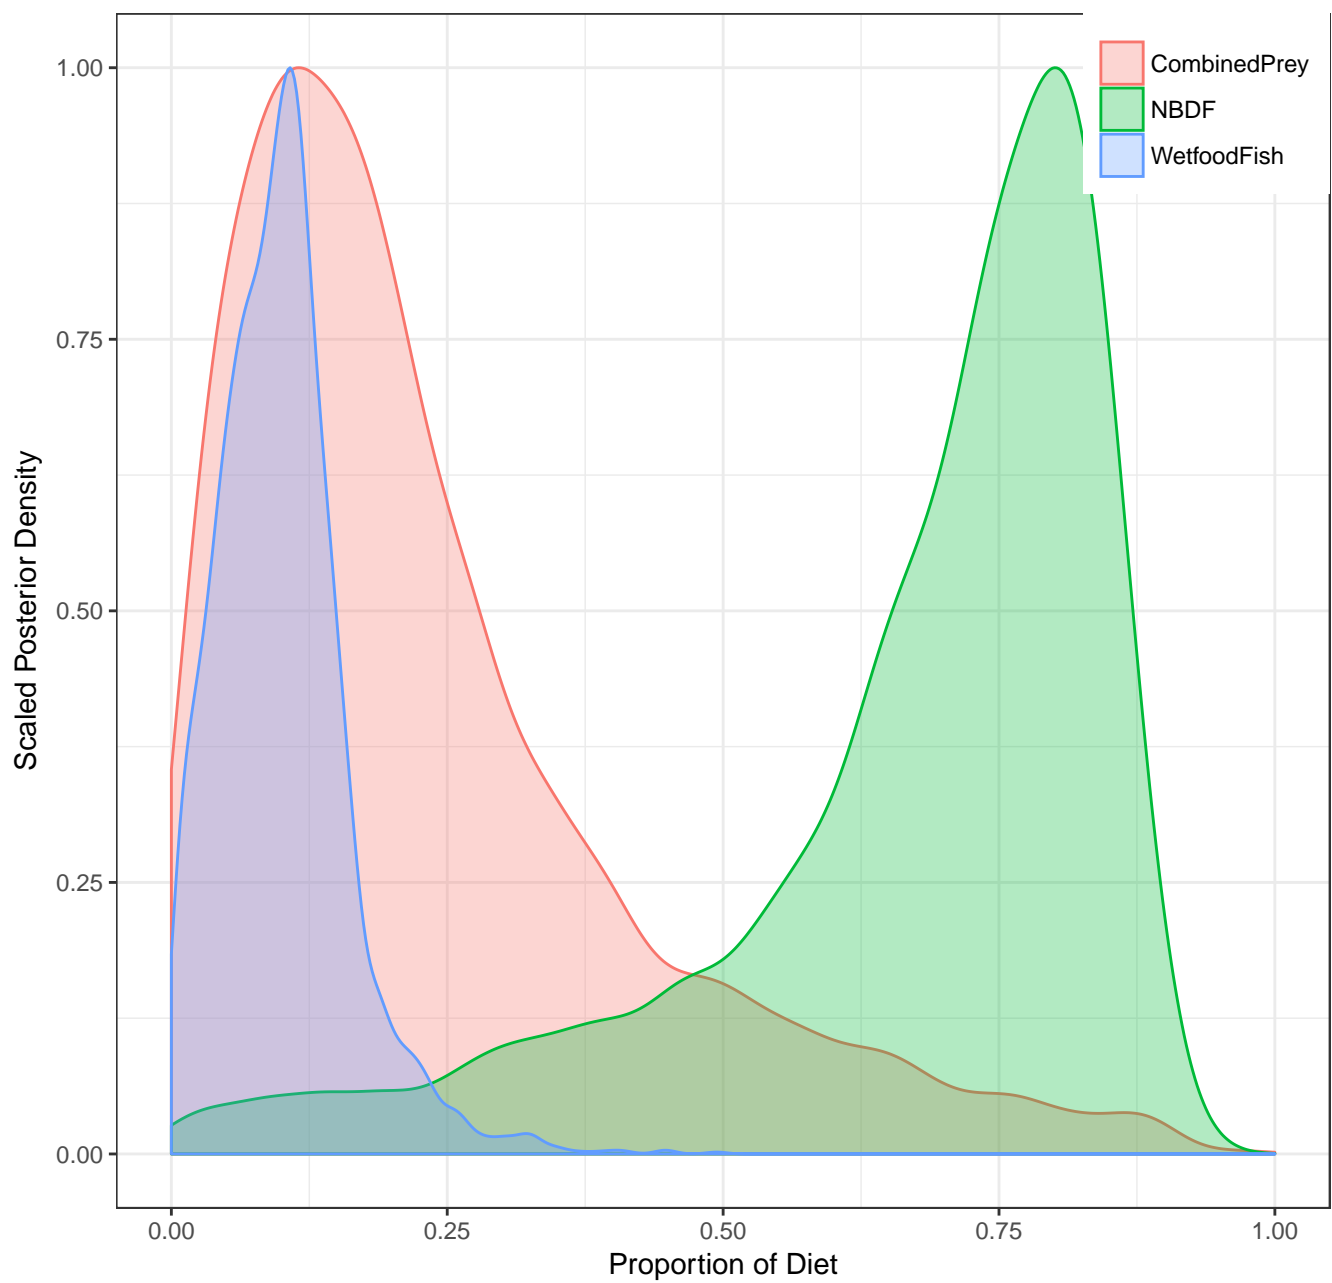

Supplement: Scaled_posterior_density_charts.zip [file Scaled_posterior_density_charts.zip]

# Overall Population

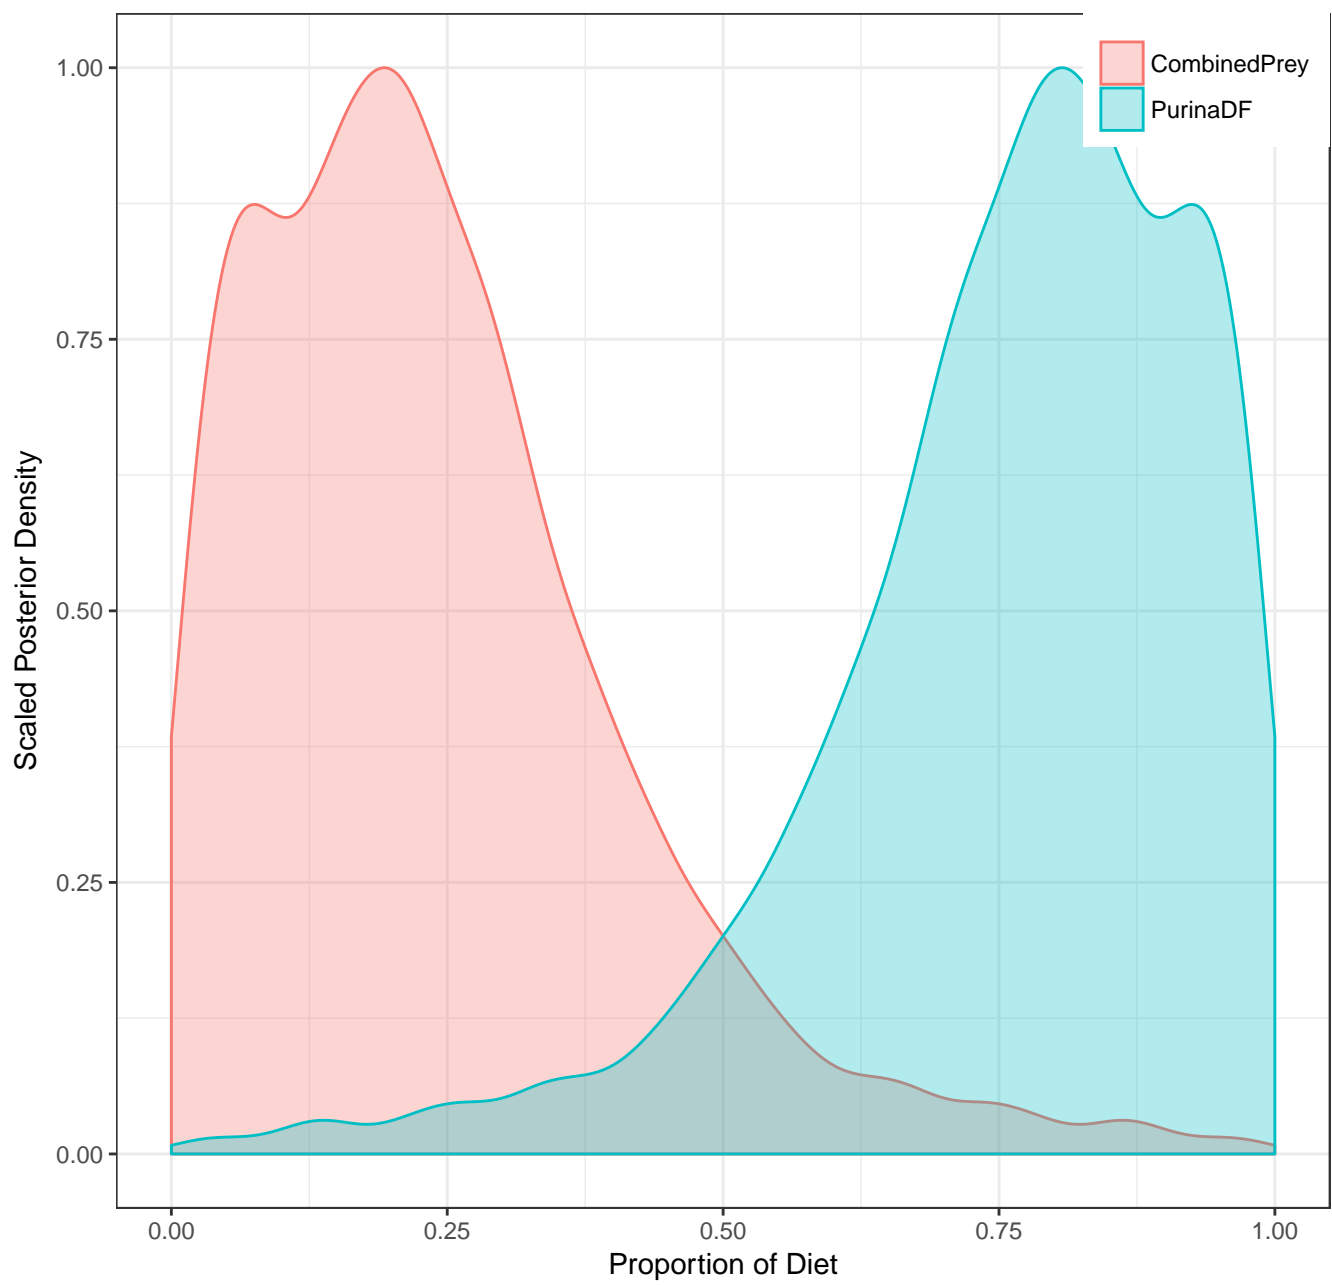

Supplement: Scaled_posterior_density_charts.zip [file Scaled_posterior_density_charts.zip]

# Overall Population

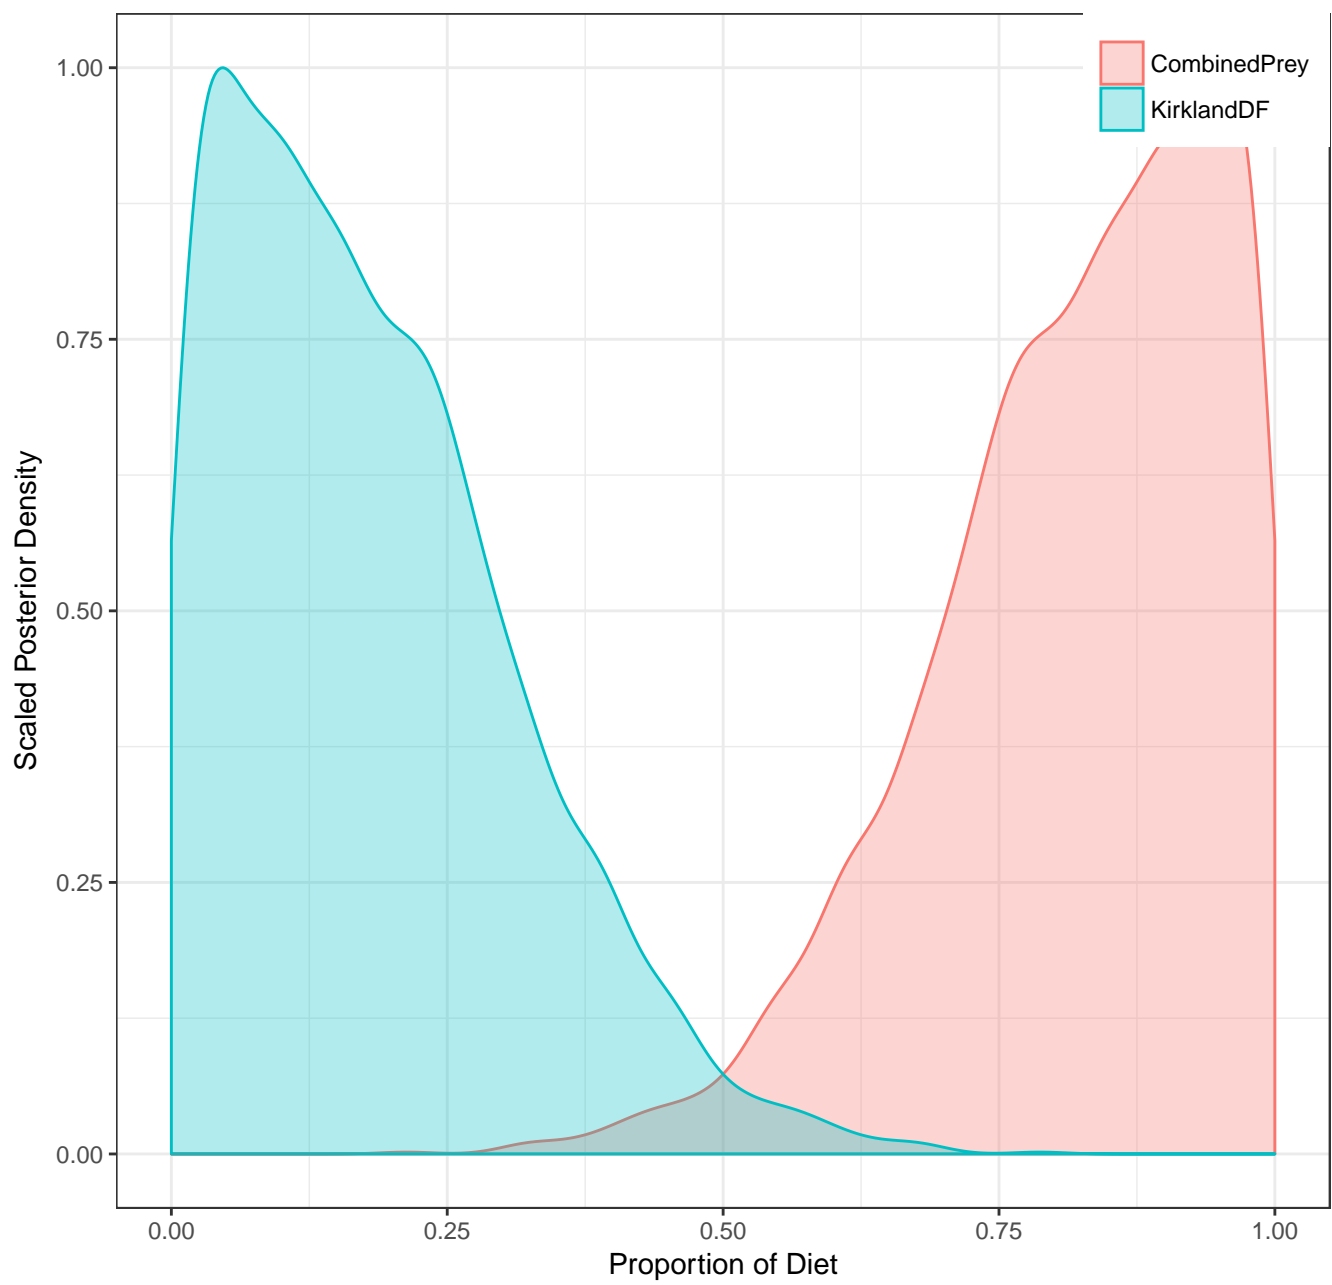

Supplement: Scaled_posterior_density_charts.zip [file Scaled_posterior_density_charts.zip]

# Overall Population

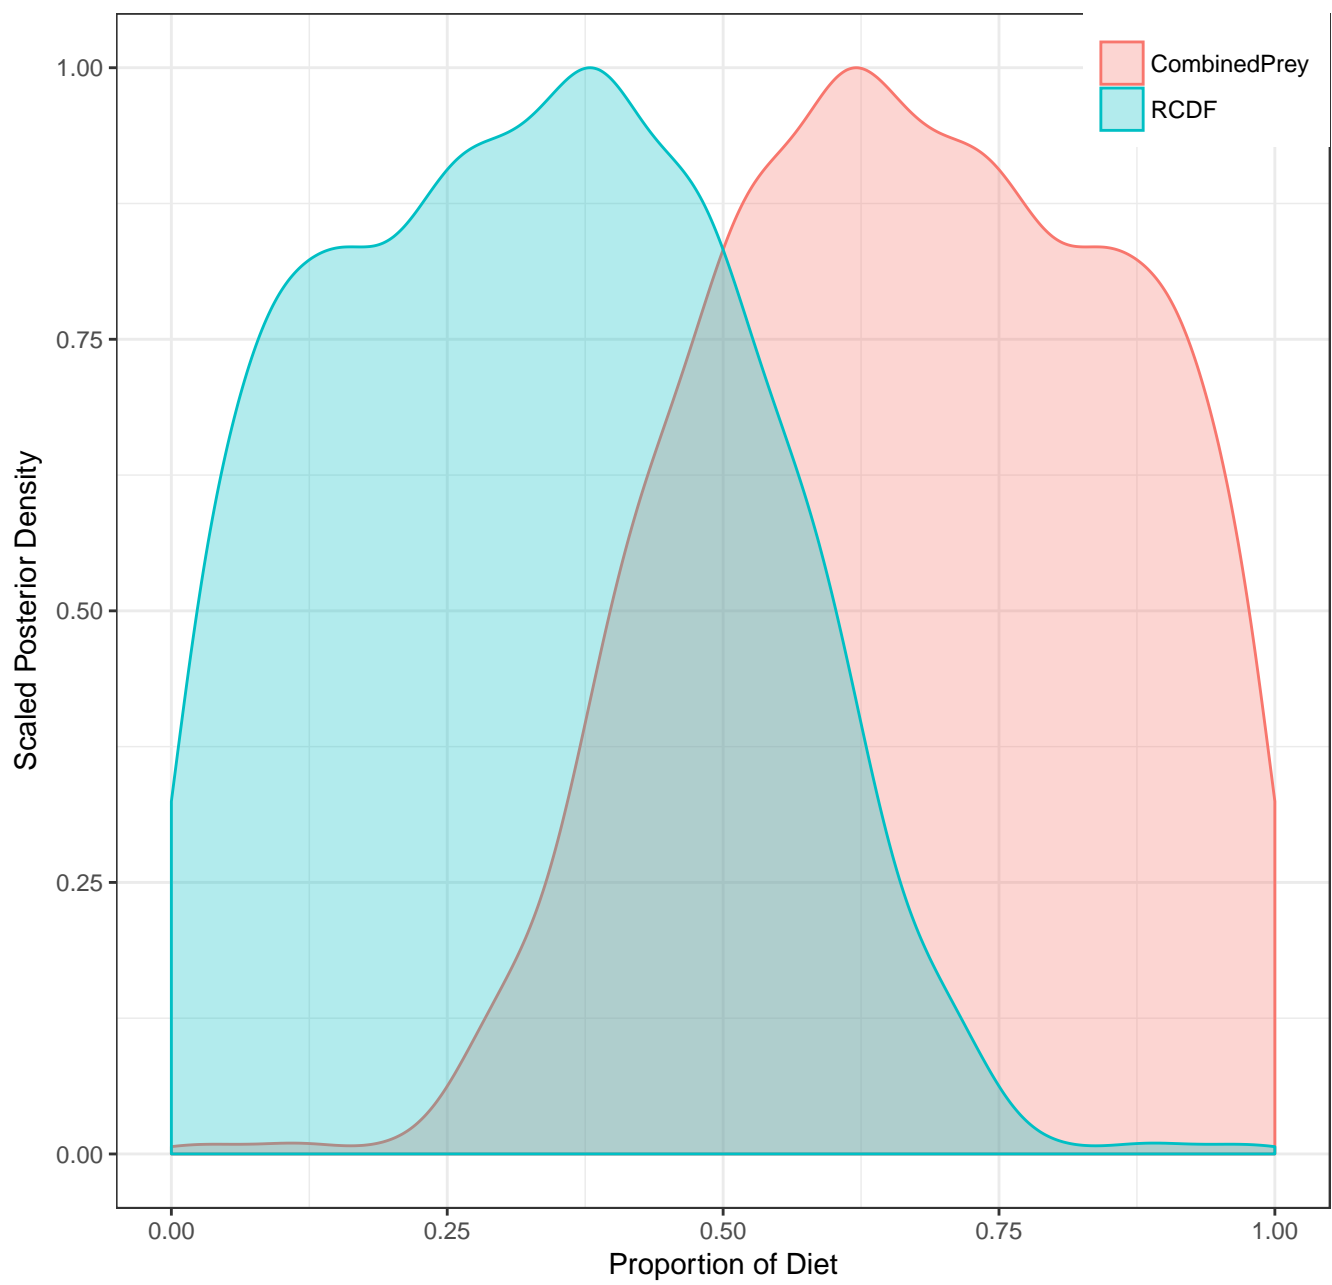

Supplement: Scaled_posterior_density_charts.zip [file Scaled_posterior_density_charts.zip]

Overall Population

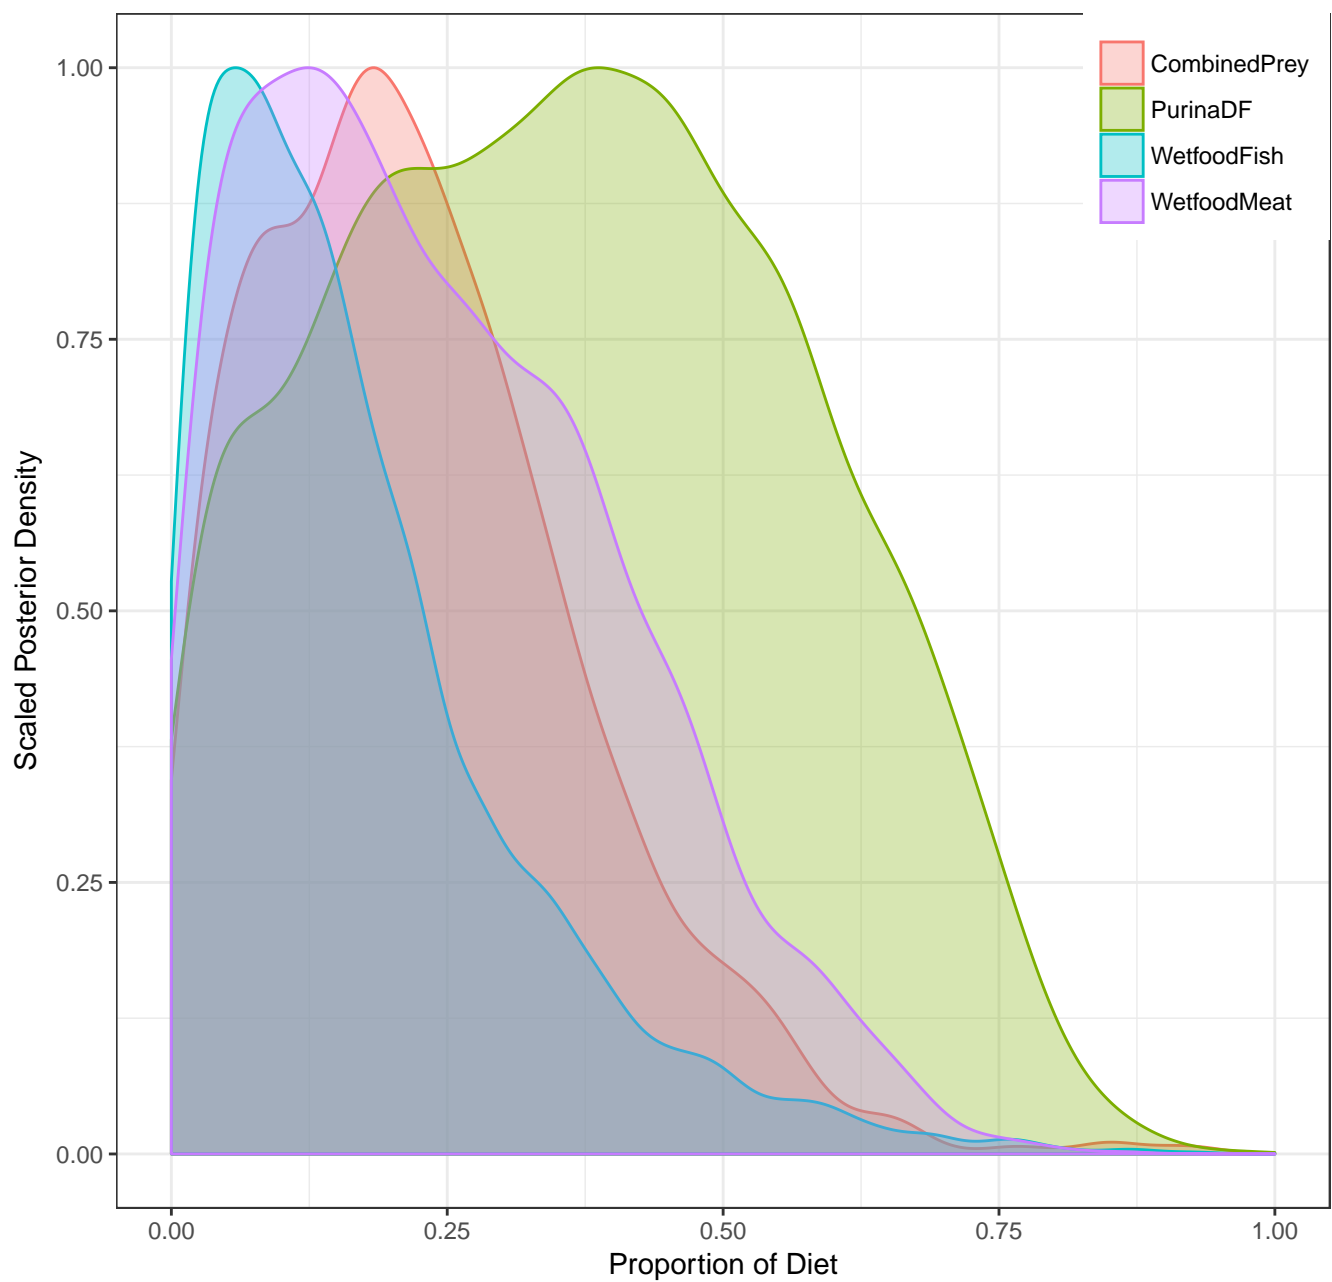

Supplement: Scaled_posterior_density_charts.zip [file Scaled_posterior_density_charts.zip]

# Overall Population

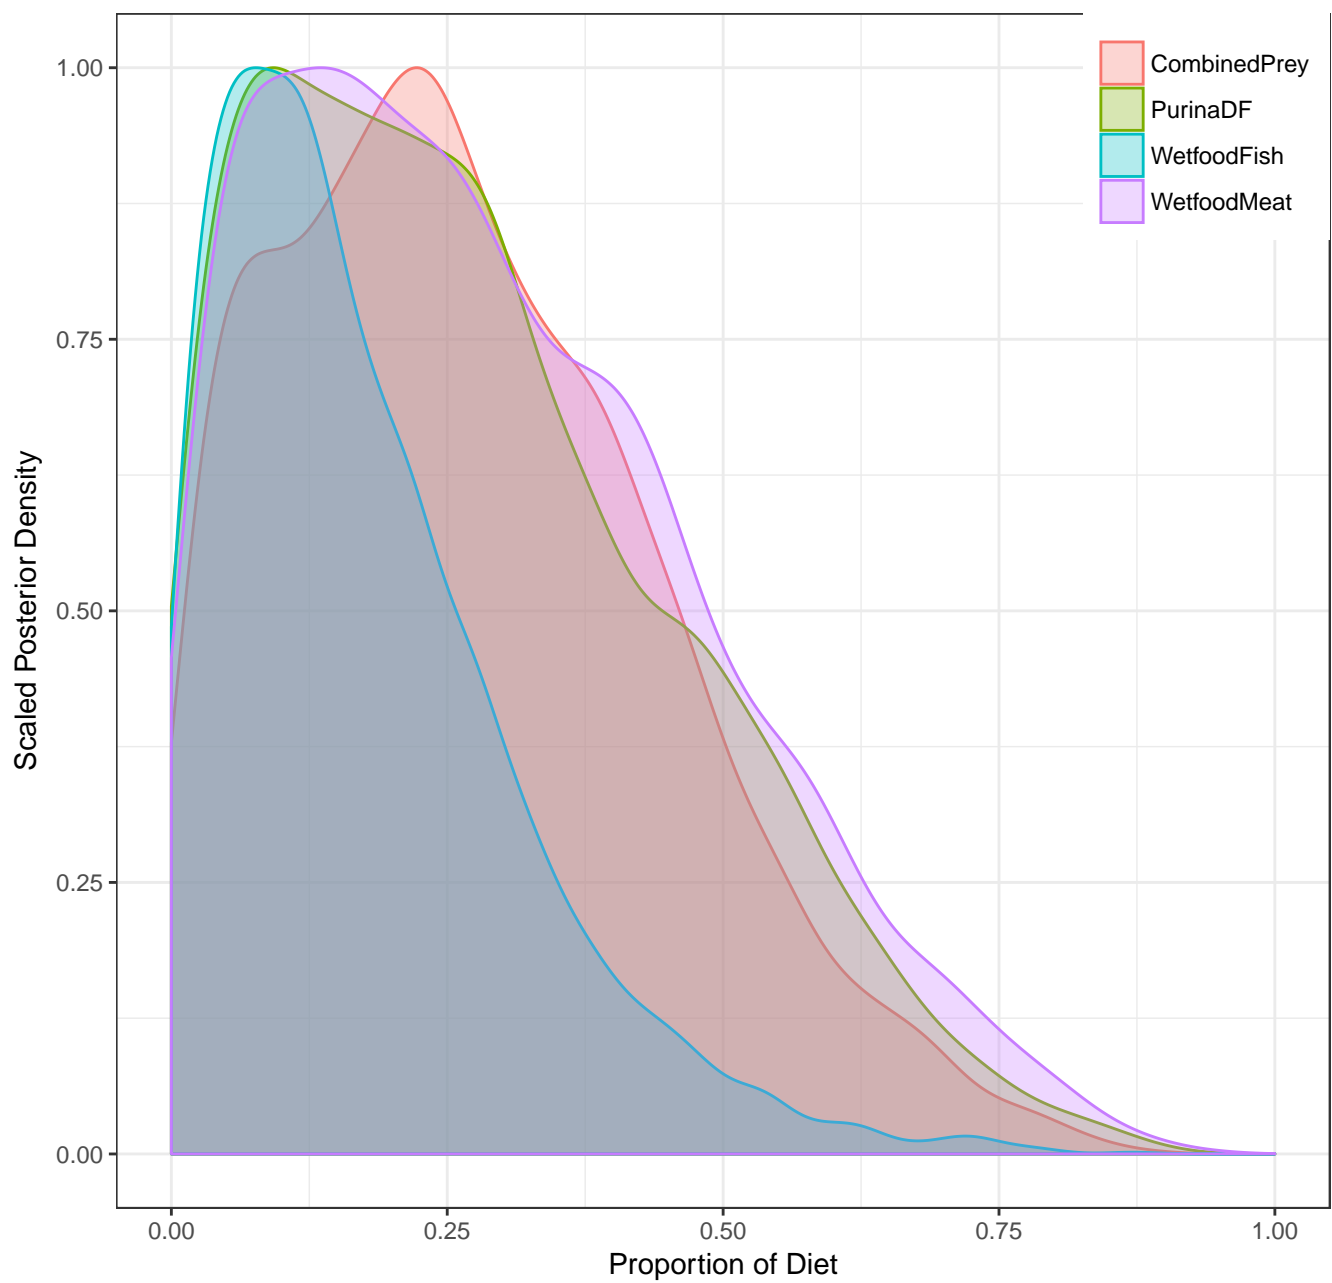

Supplement: Scaled_posterior_density_charts.zip [file Scaled_posterior_density_charts.zip]

Overall Population

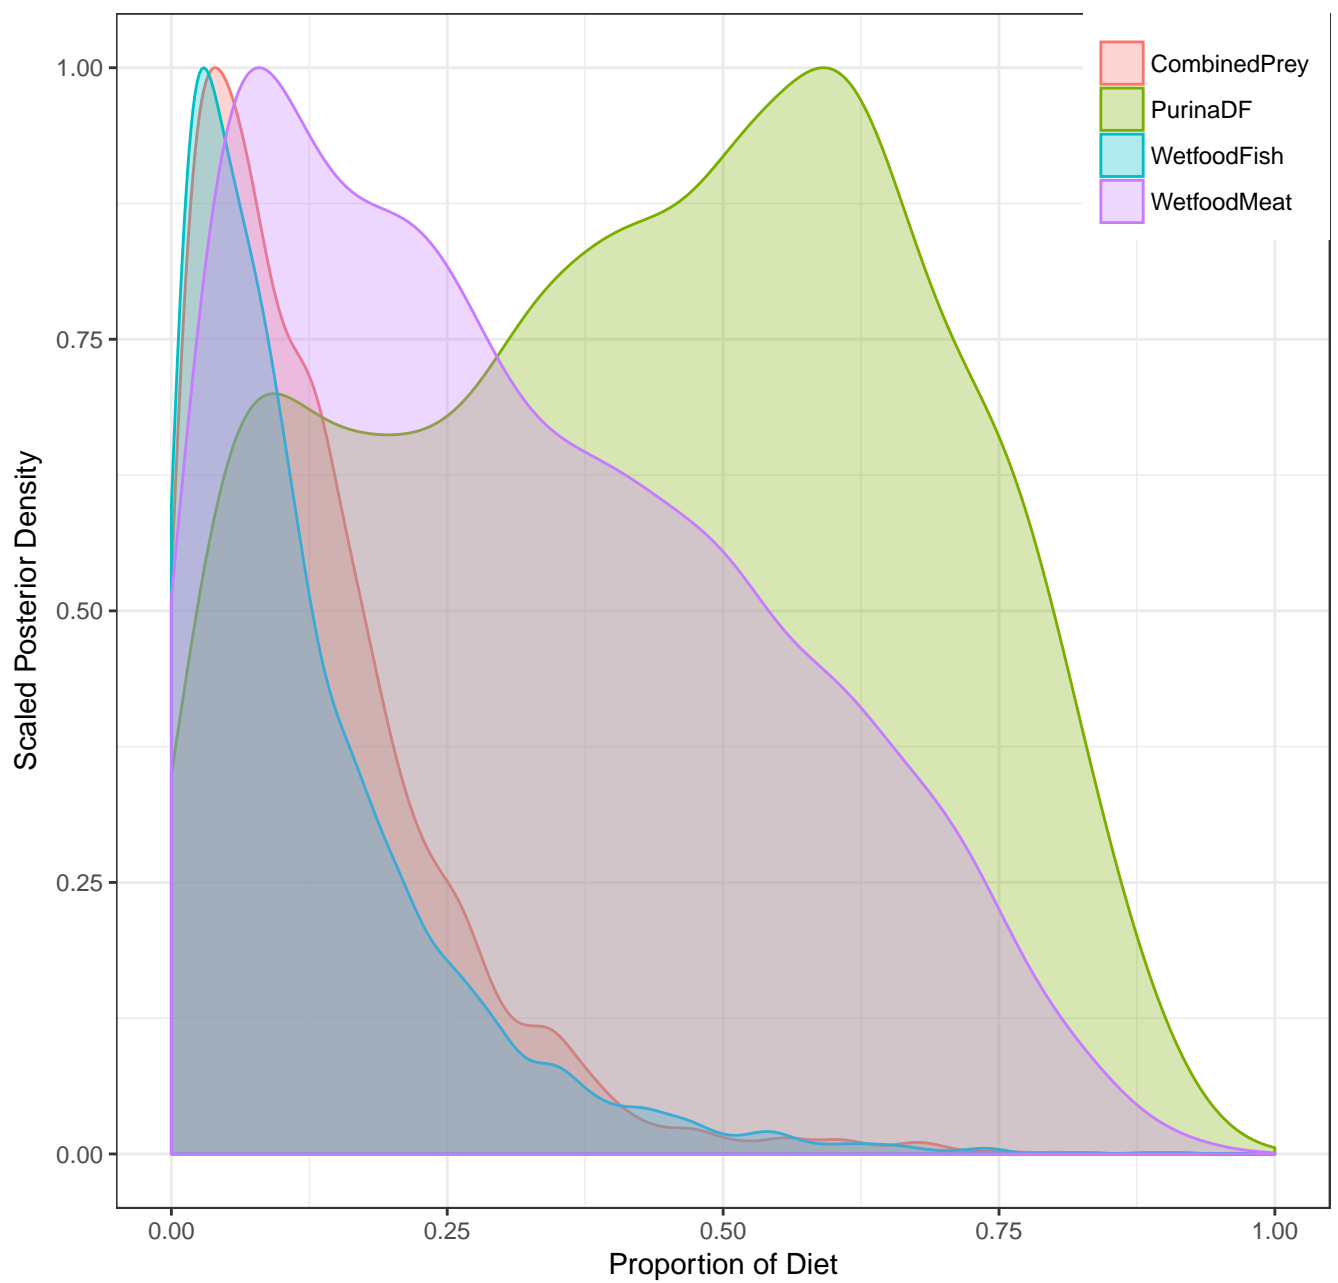

Supplement: Scaled_posterior_density_charts.zip [file Scaled_posterior_density_charts.zip]

# Overall Population

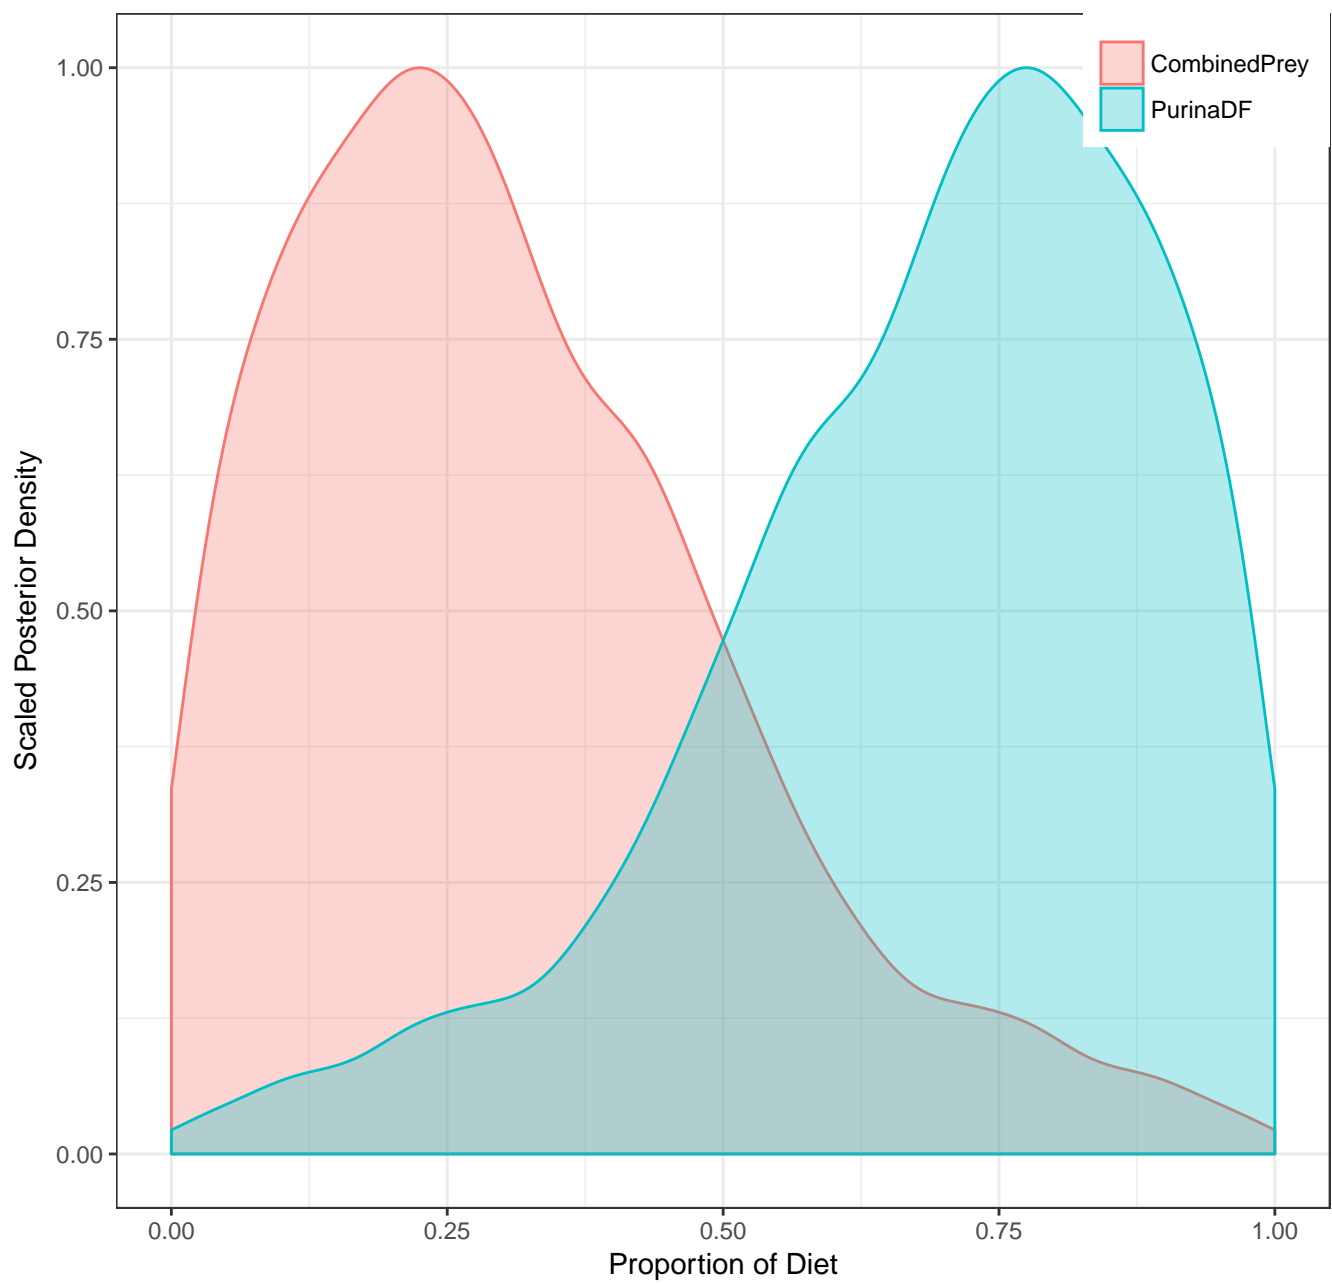

Supplement: Scaled_posterior_density_charts.zip [file Scaled_posterior_density_charts.zip]

# Overall Population

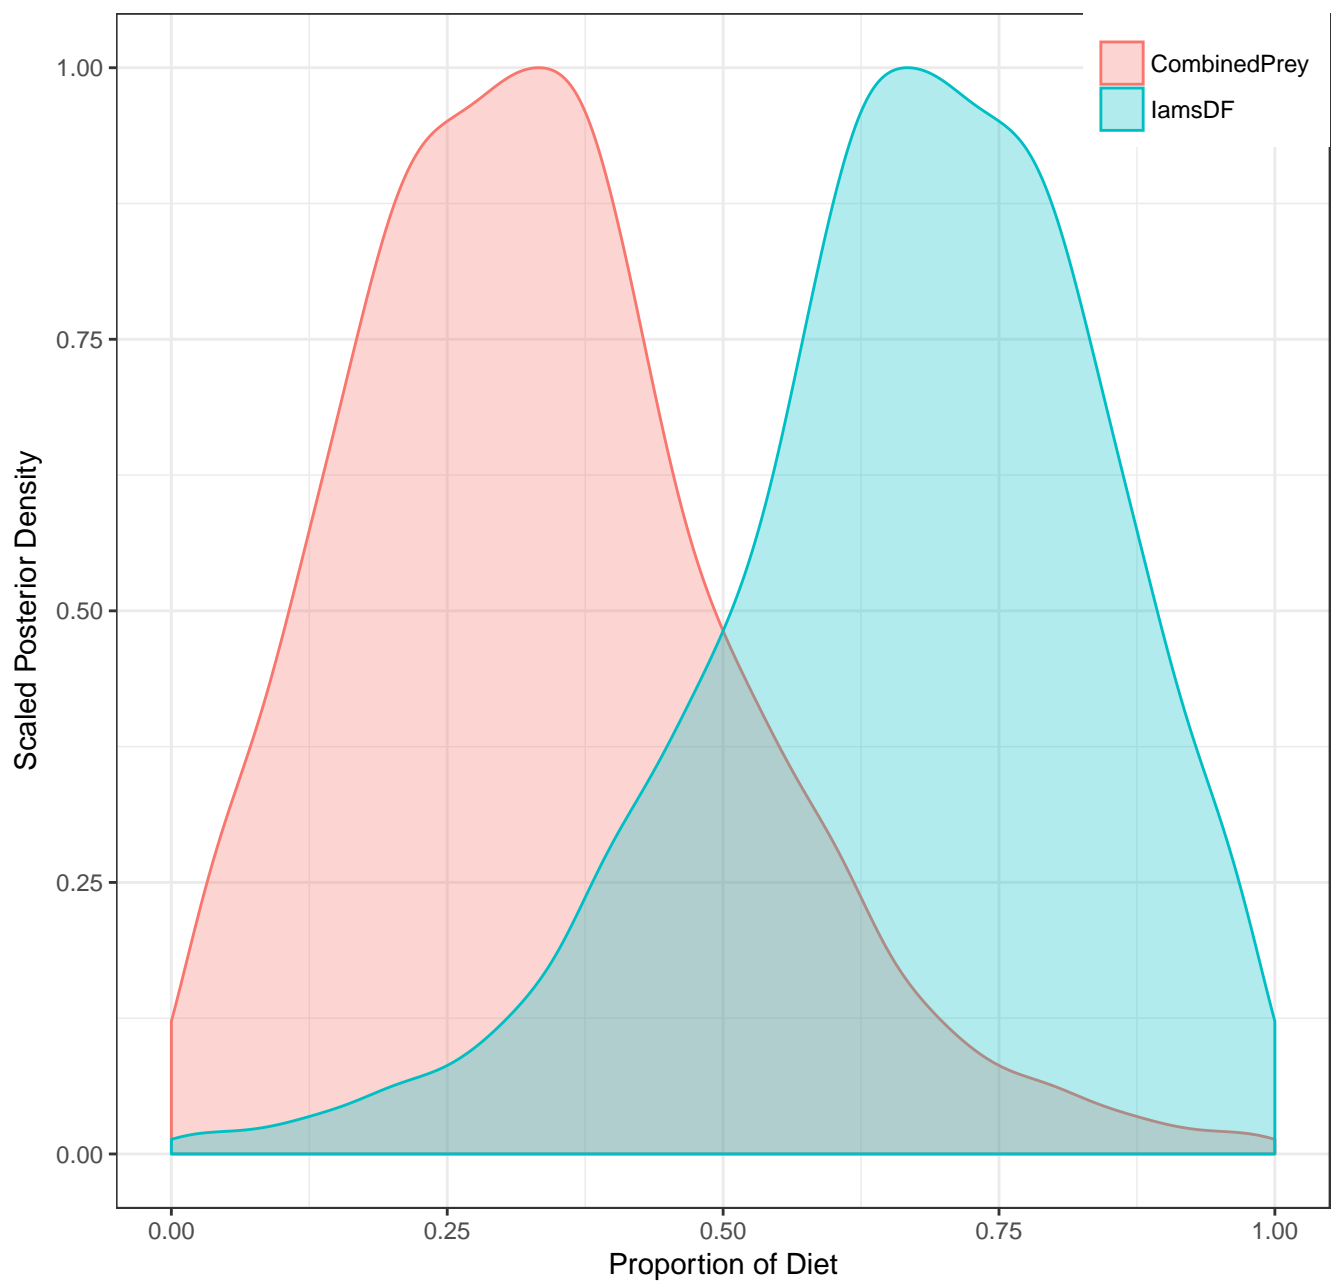

Supplement: Scaled_posterior_density_charts.zip [file Scaled_posterior_density_charts.zip]

# Overall Population

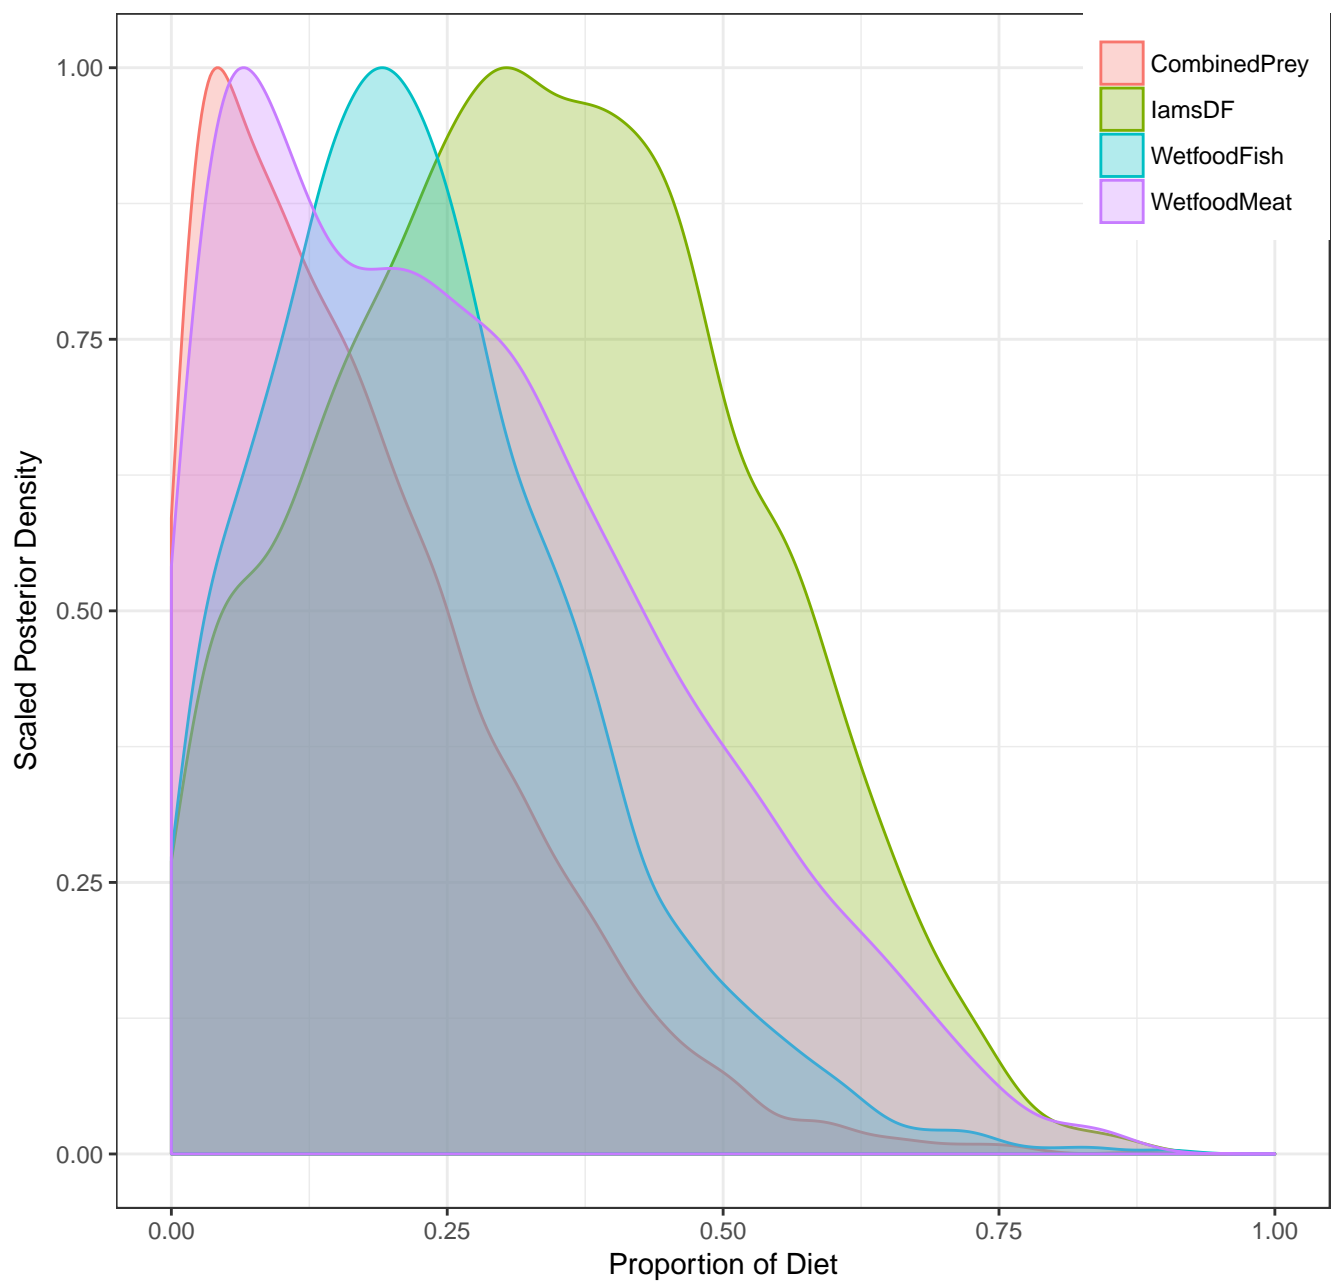

Supplement: Scaled_posterior_density_charts.zip [file Scaled_posterior_density_charts.zip]

# Overall Population

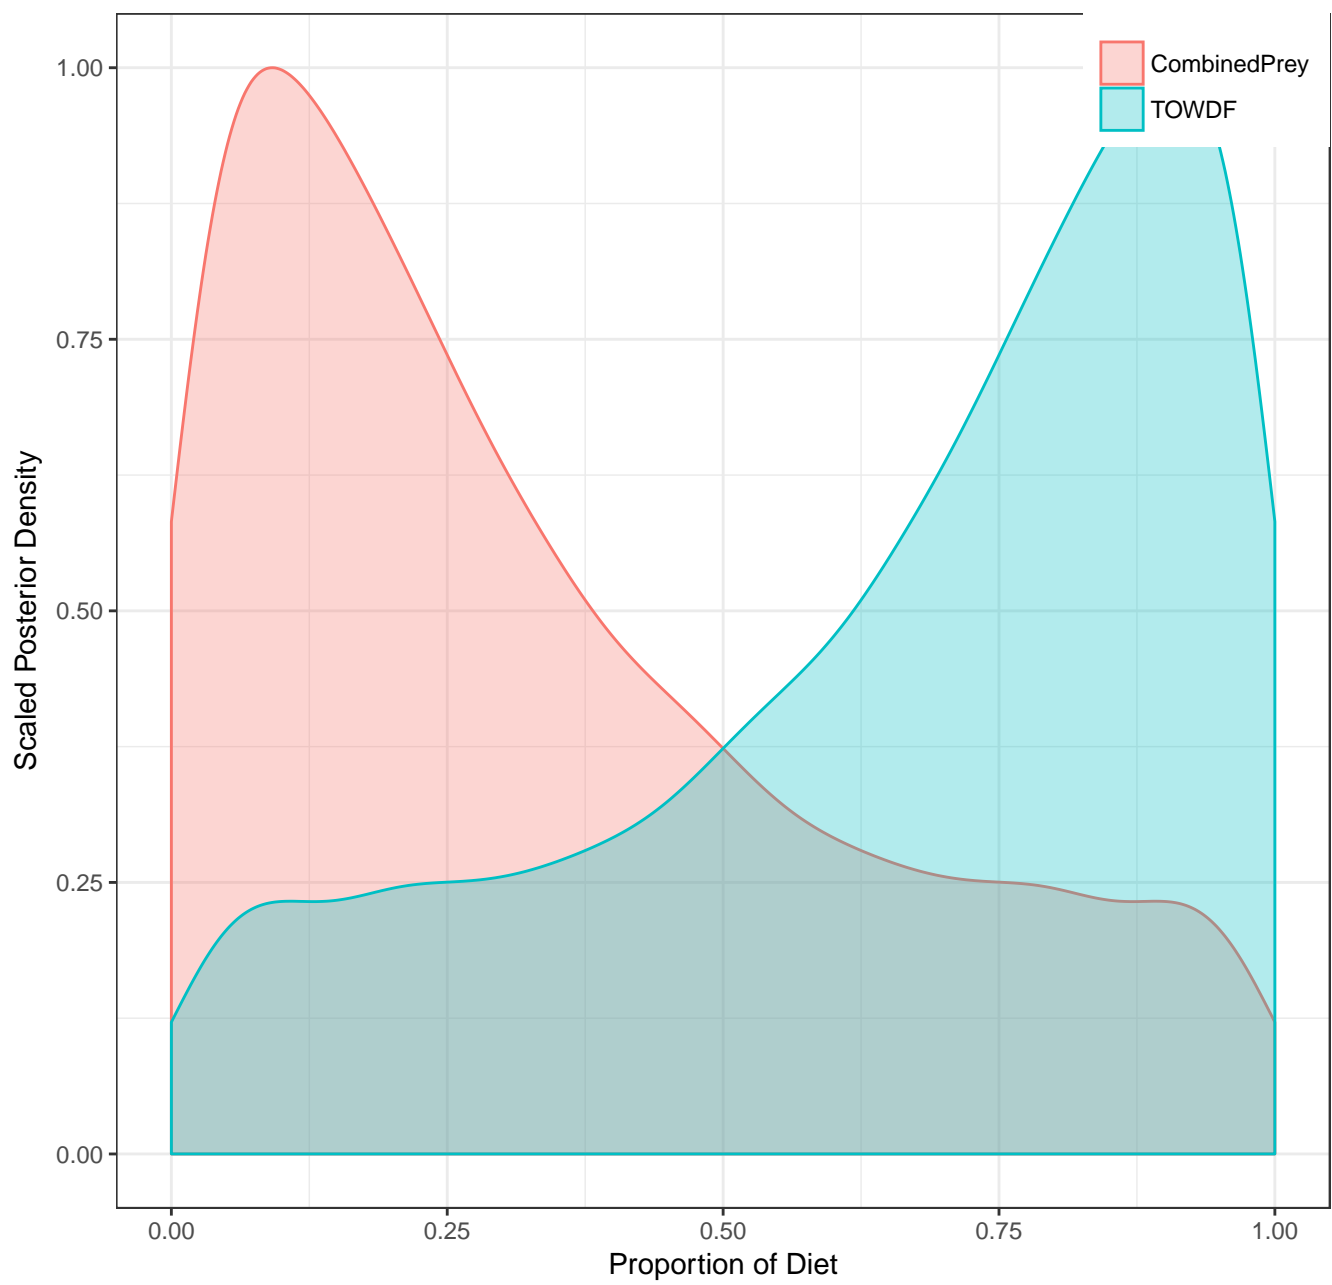

Supplement: Scaled_posterior_density_charts.zip [file Scaled_posterior_density_charts.zip]

# Overall Population

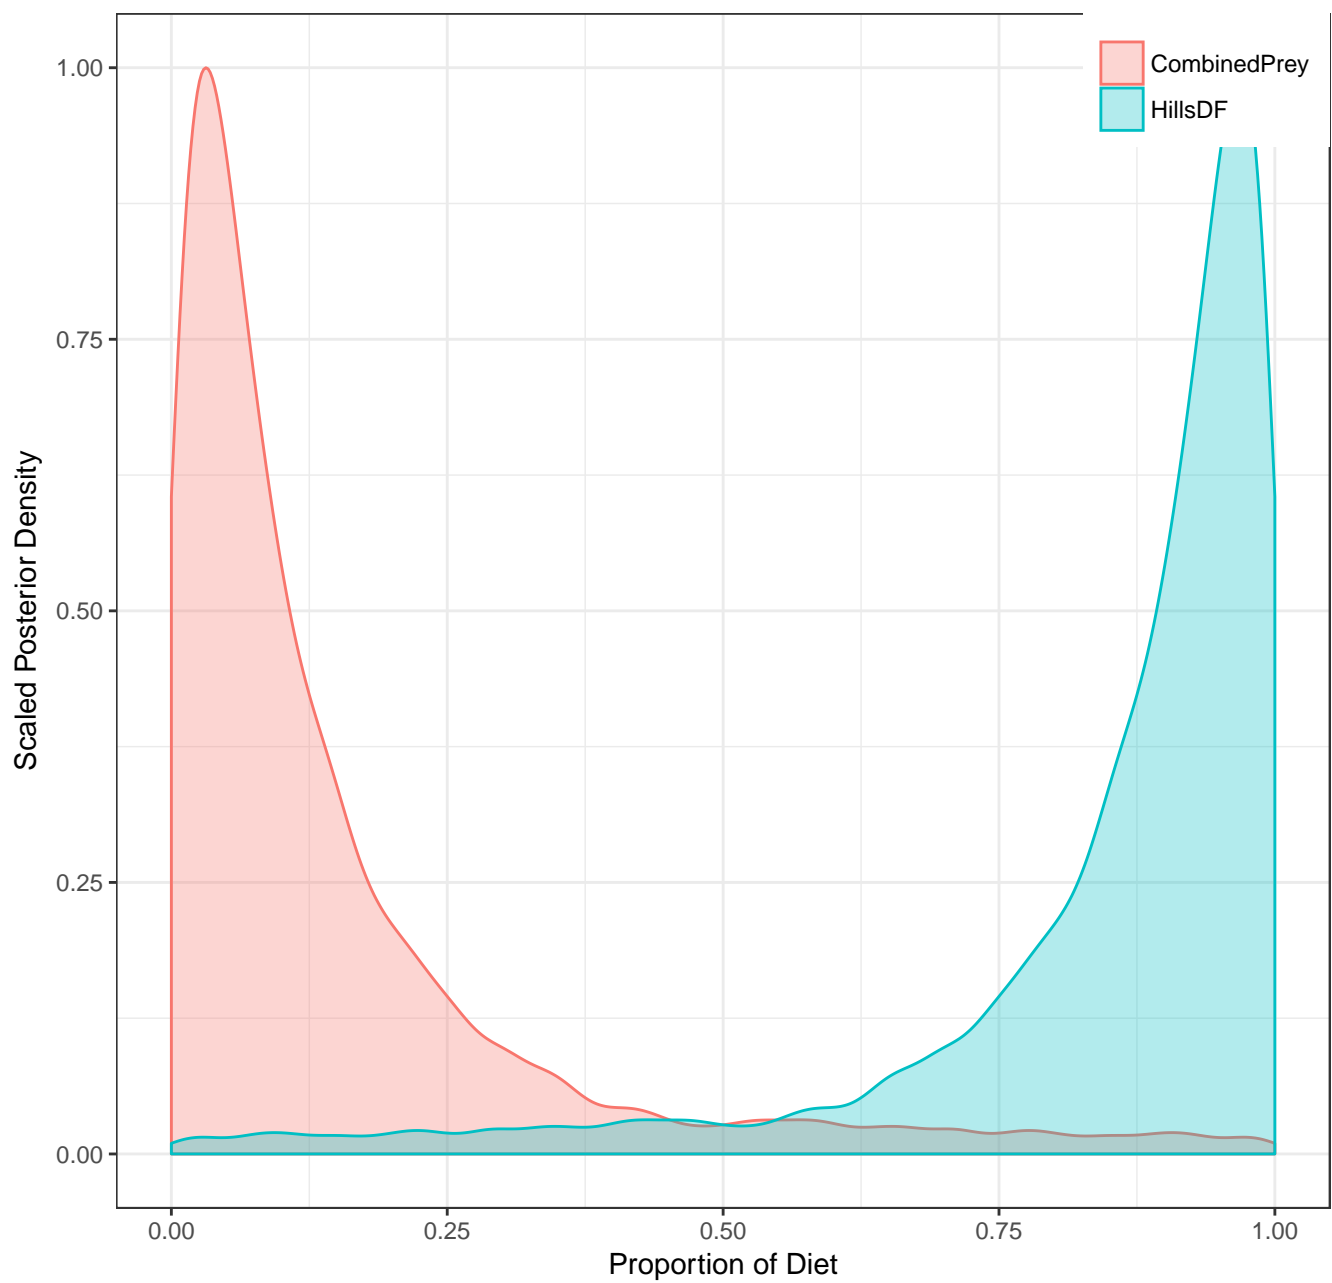

Supplement: Scaled_posterior_density_charts.zip [file Scaled_posterior_density_charts.zip]

Overall Population

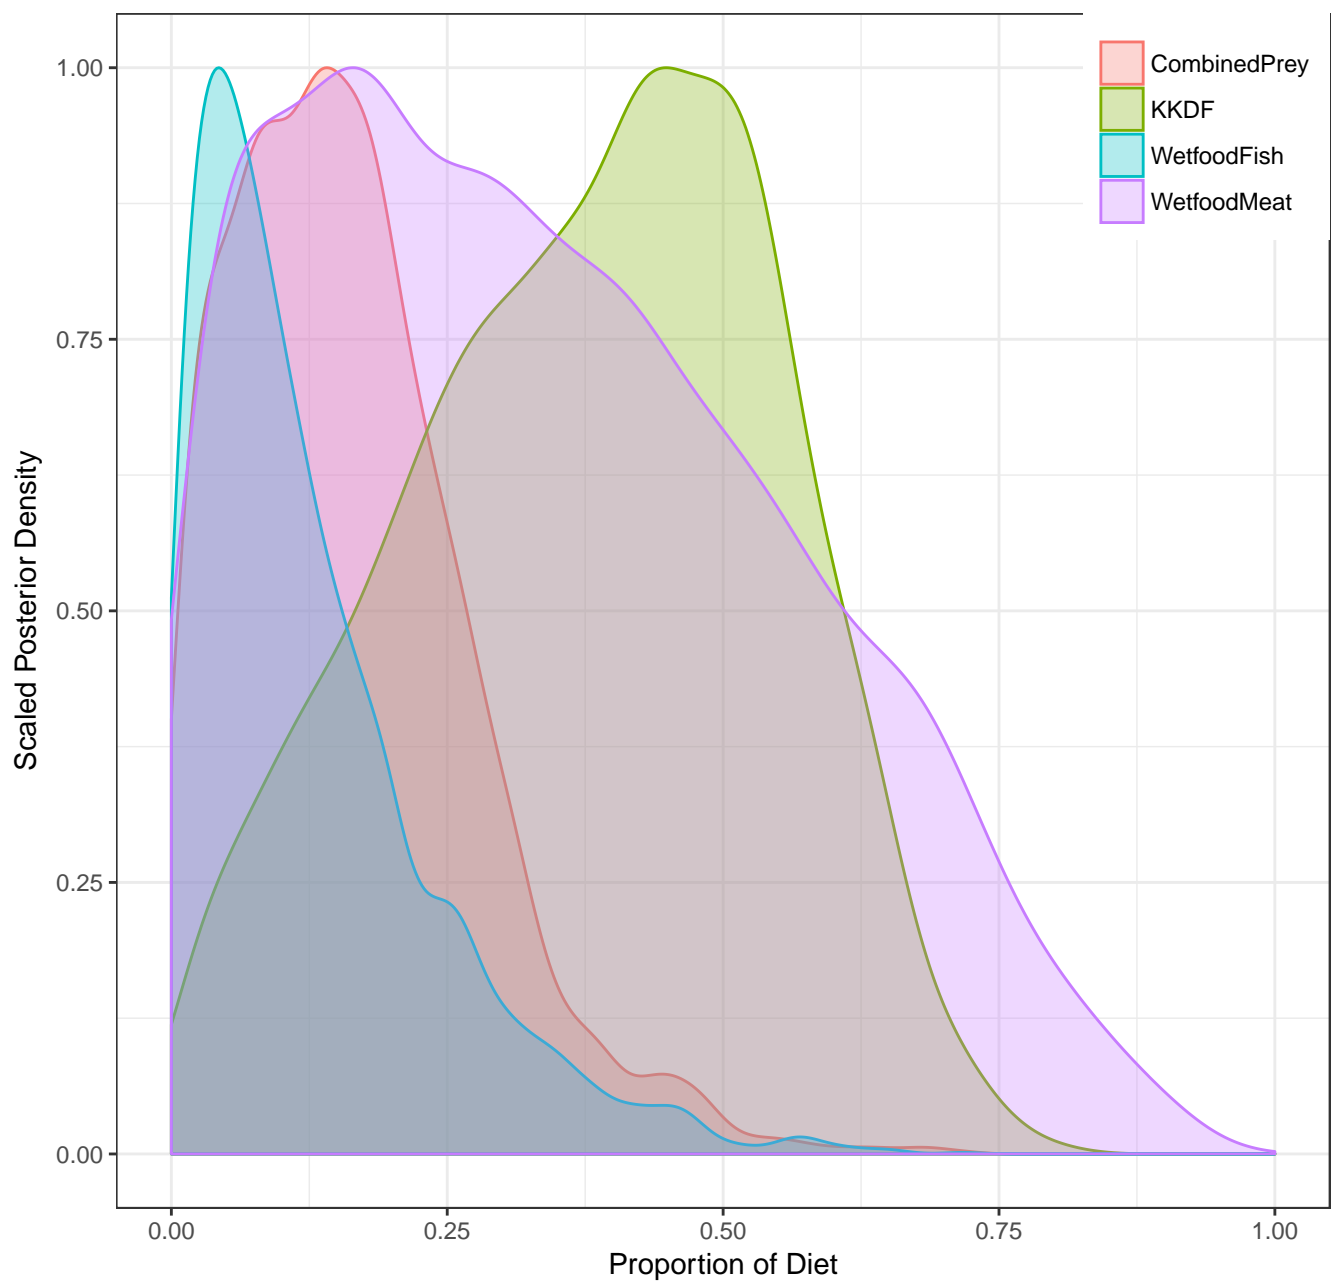

Supplement: Scaled_posterior_density_charts.zip [file Scaled_posterior_density_charts.zip]

# Overall Population

Scaled Posterior Density

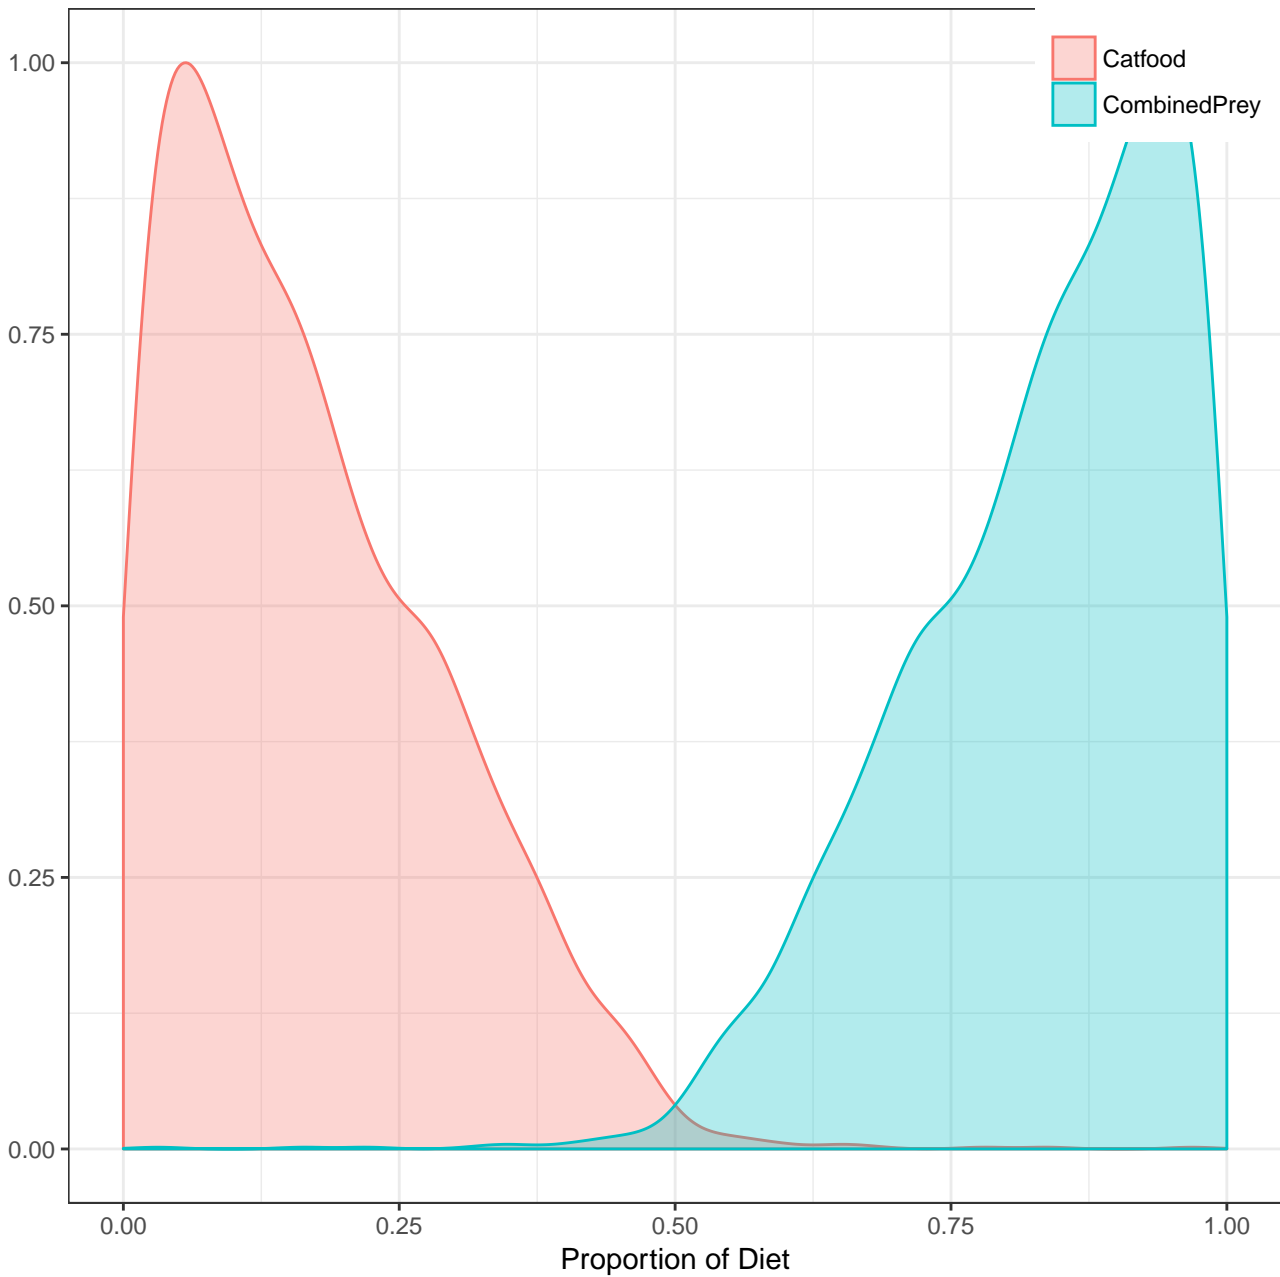

Supplement: Scaled_posterior_density_charts.zip [file Scaled_posterior_density_charts.zip]

# Overall Population

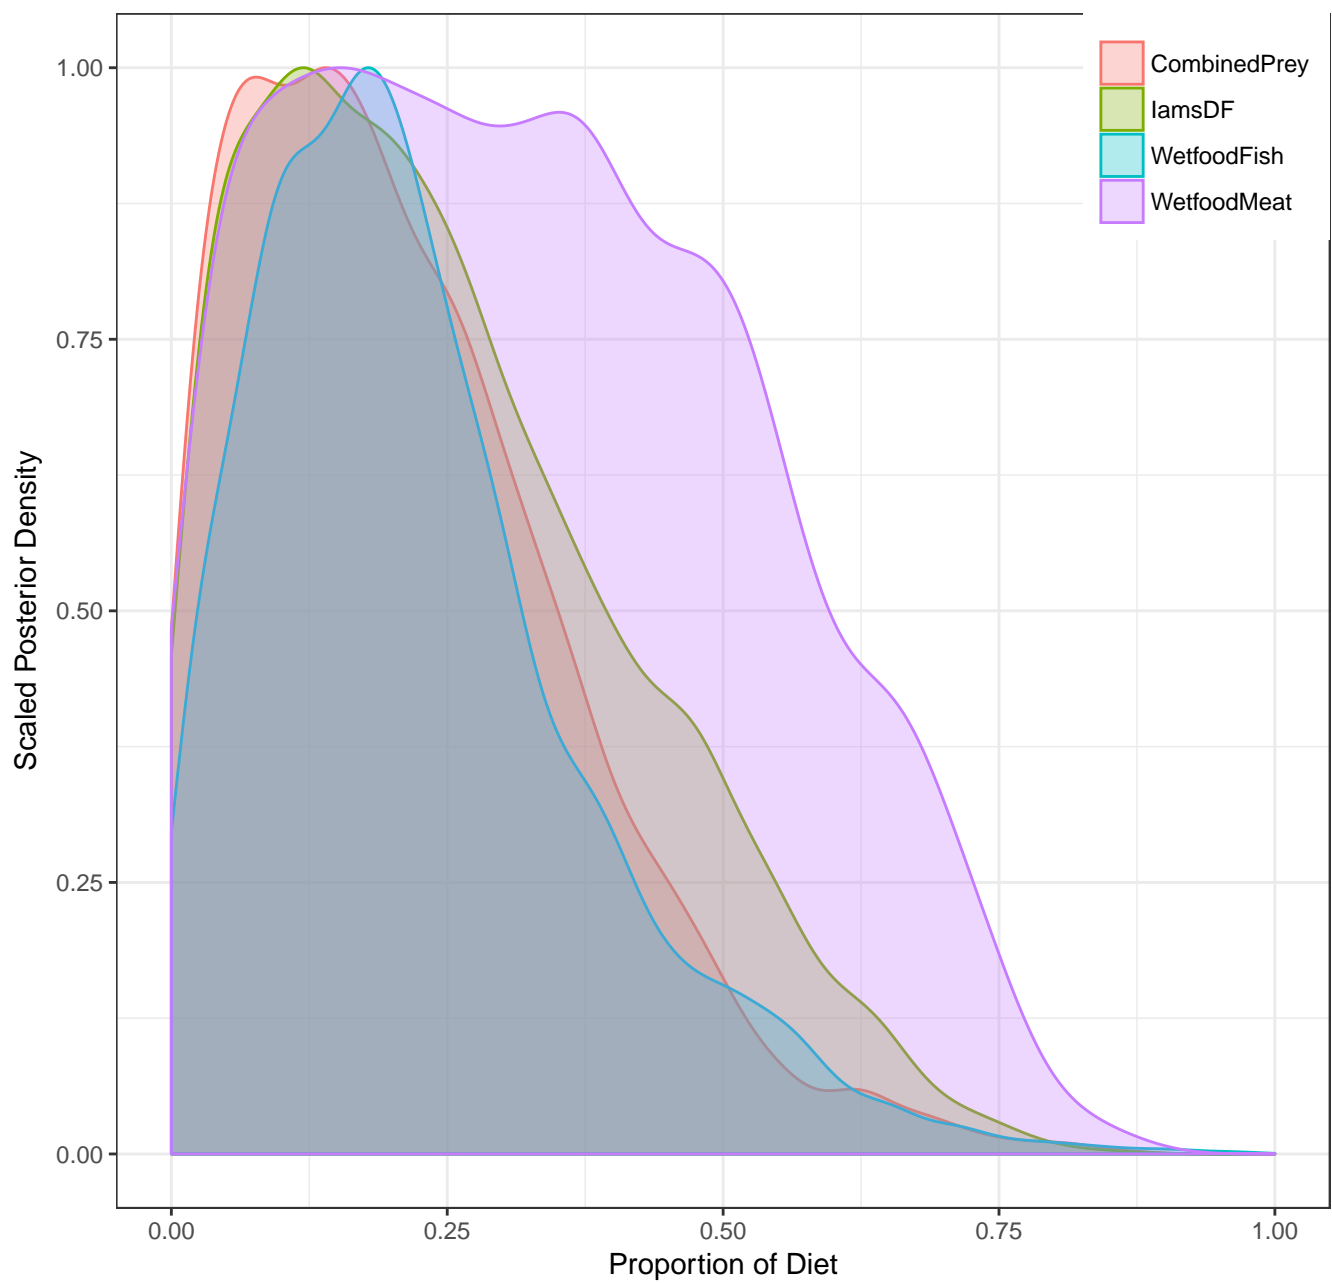

Supplement: Scaled_posterior_density_charts.zip [file Scaled_posterior_density_charts.zip]

# Overall Population

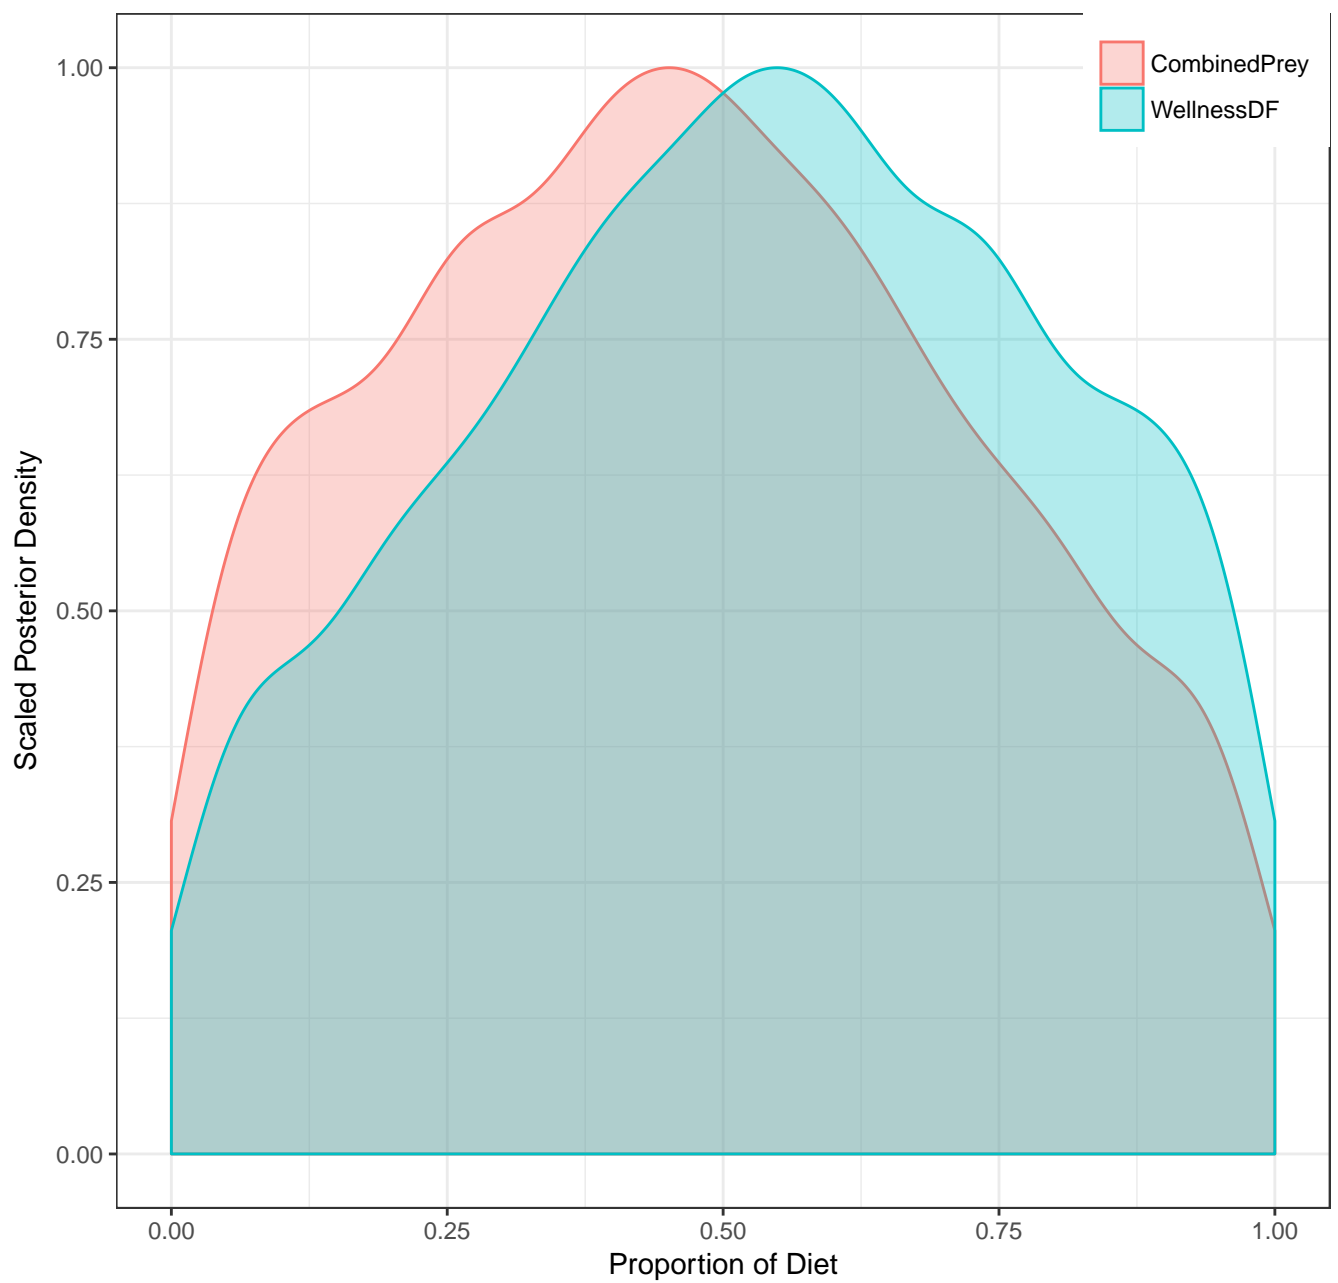

Supplement: Scaled_posterior_density_charts.zip [file Scaled_posterior_density_charts.zip]

# Overall Population

Scaled Posterior Density

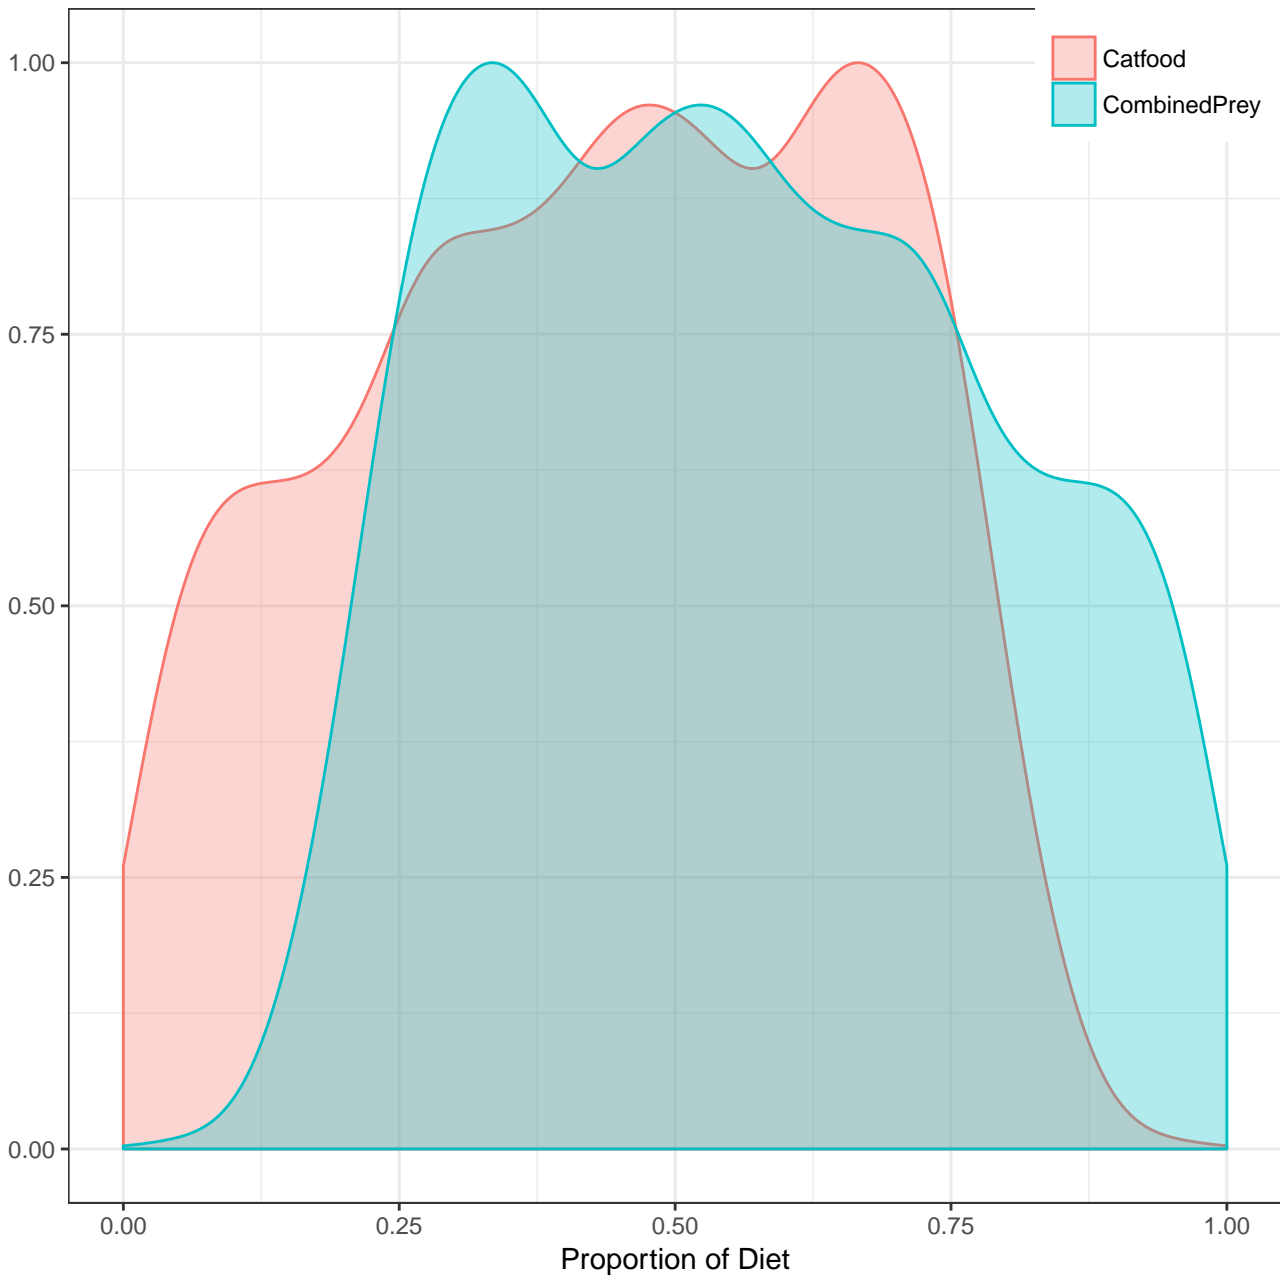

Supplement: Scaled_posterior_density_charts.zip [file Scaled_posterior_density_charts.zip]

Overall Population

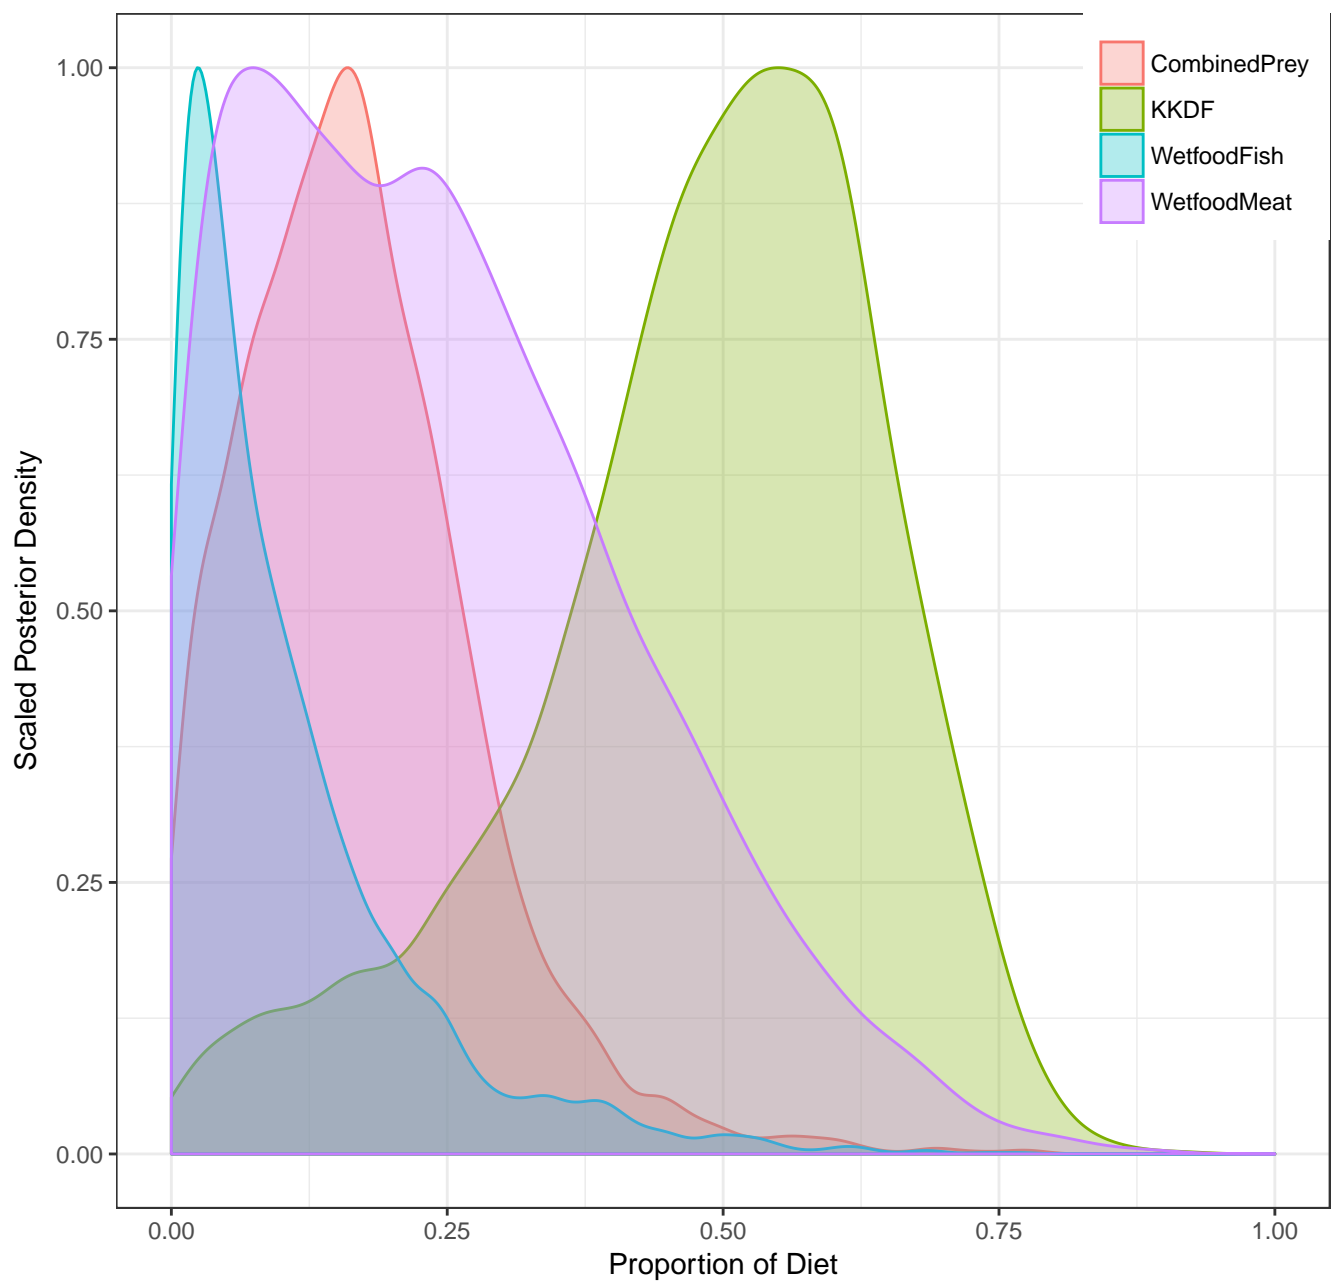

Supplement: Scaled_posterior_density_charts.zip [file Scaled_posterior_density_charts.zip]

# Overall Population

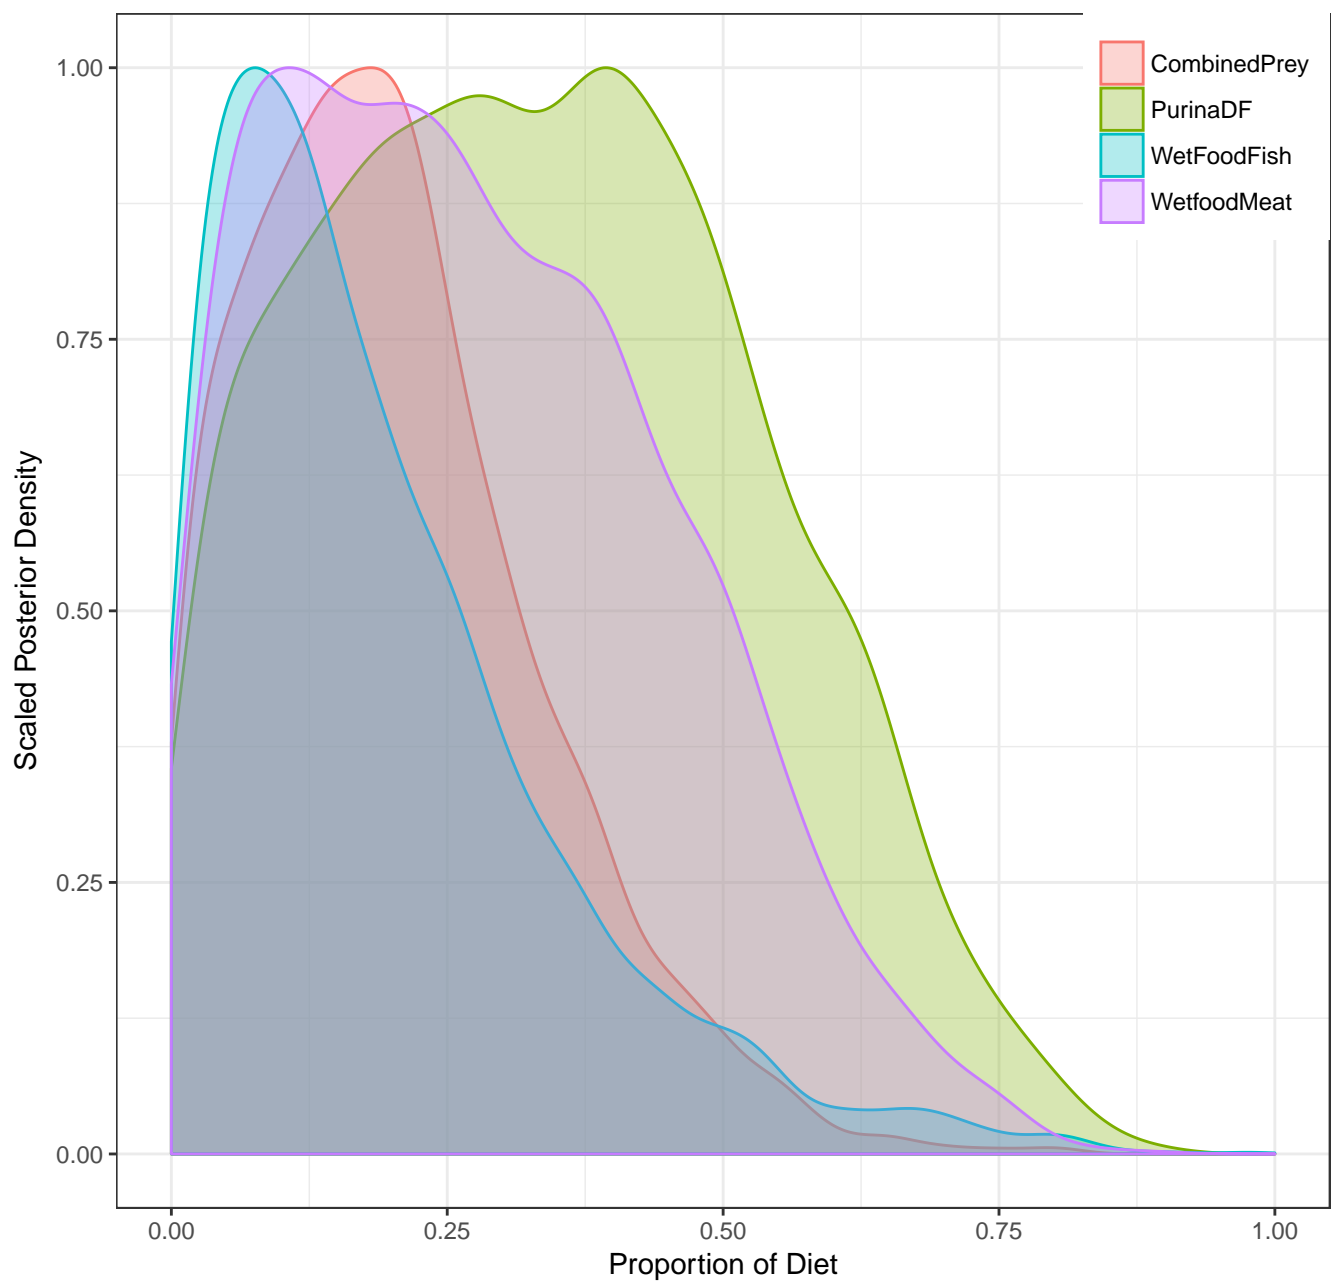

Supplement: Scaled_posterior_density_charts.zip [file Scaled_posterior_density_charts.zip]

# Overall Population

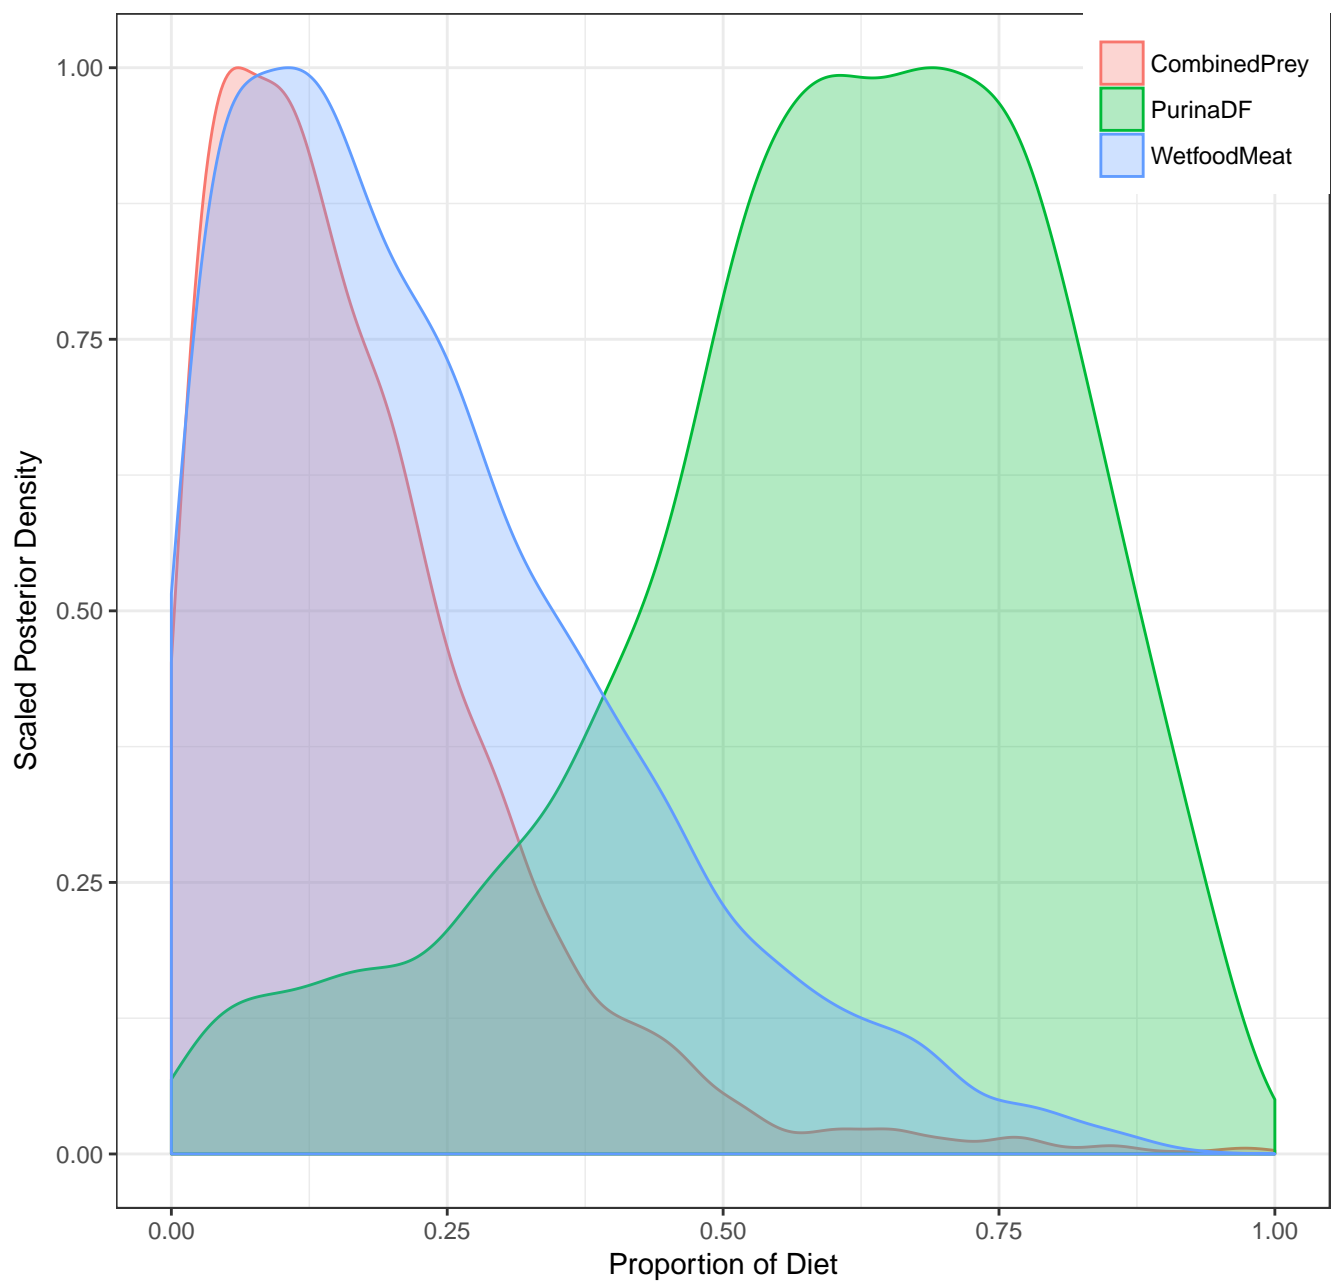

Supplement: Scaled_posterior_density_charts.zip [file Scaled_posterior_density_charts.zip]

# Overall Population

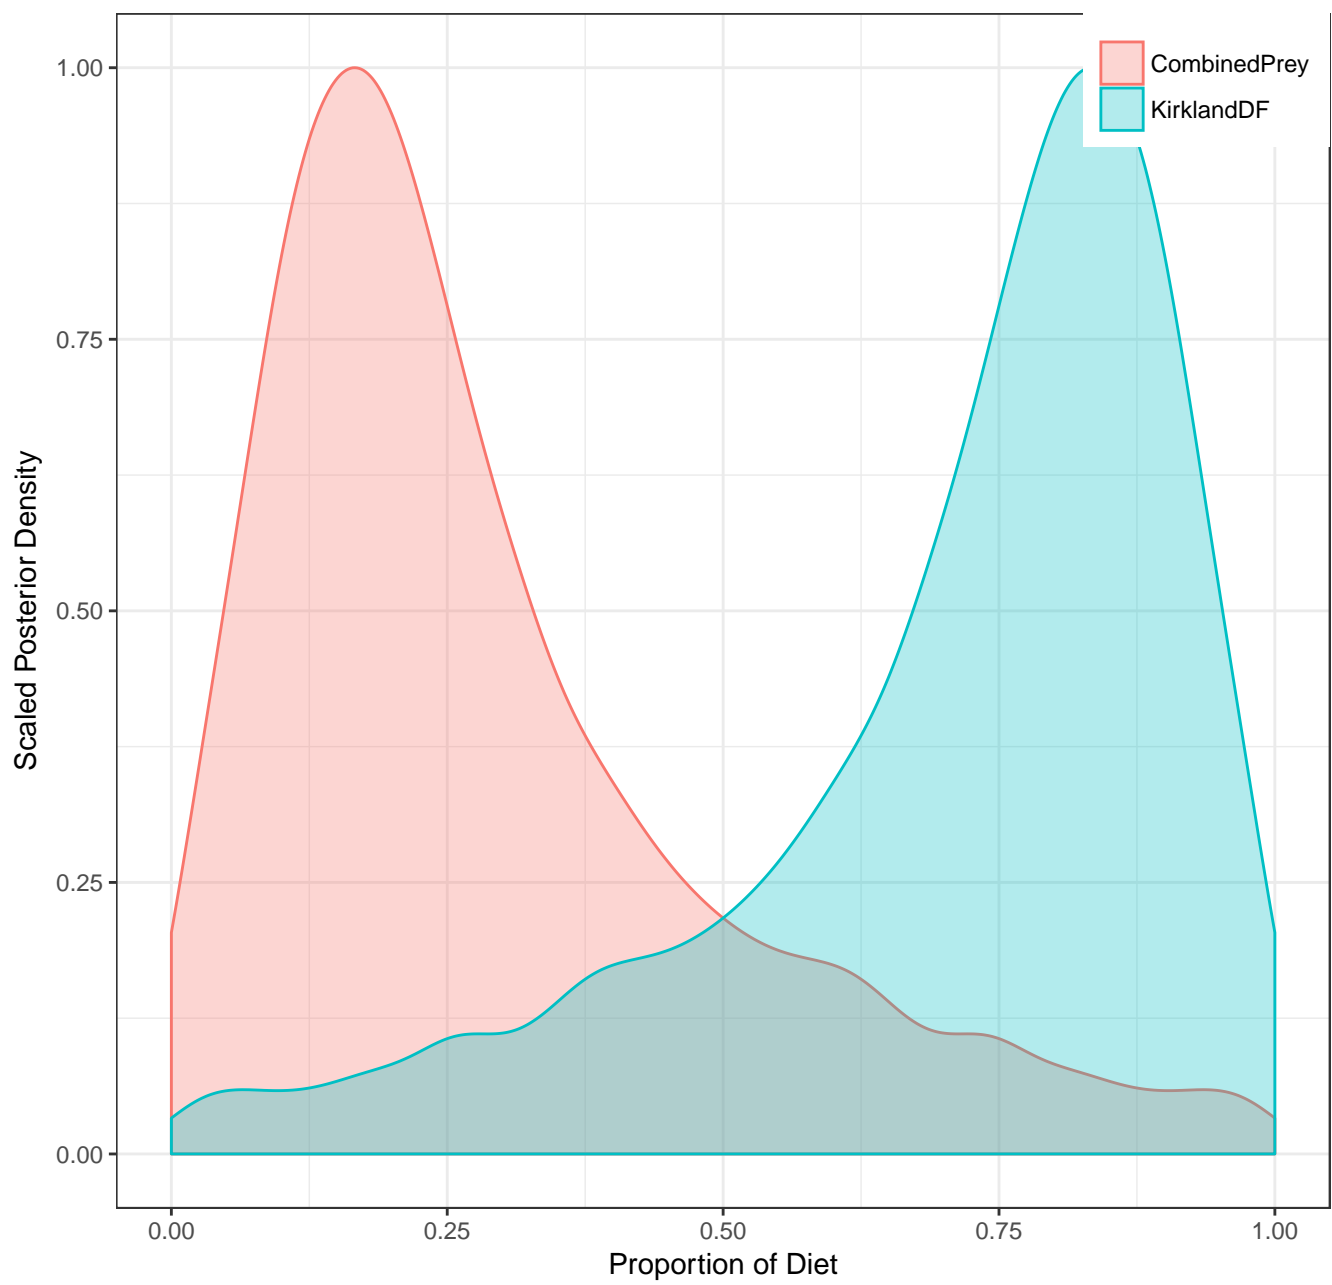

Supplement: Scaled_posterior_density_charts.zip [file Scaled_posterior_density_charts.zip]

# Overall Population

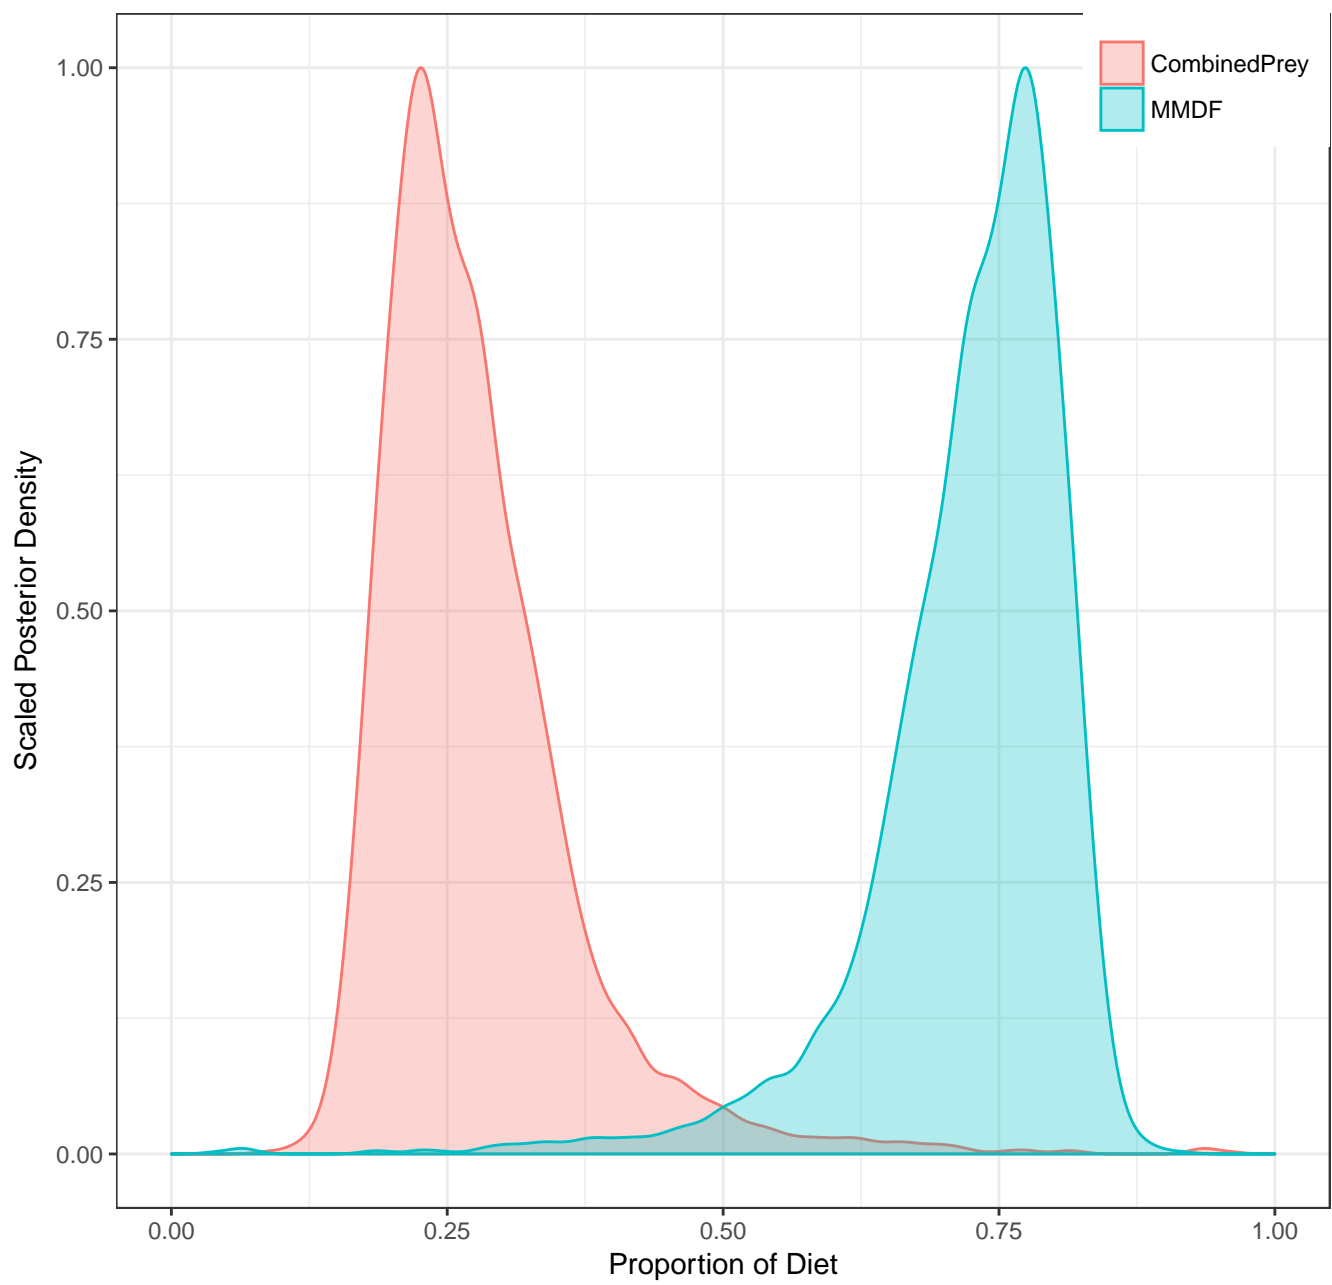

Supplement: Scaled_posterior_density_charts.zip [file Scaled_posterior_density_charts.zip]
